# Supplementary material for: Analysis of the role and mechanism of EGCG in septic cardiomyopathy based on network pharmacology
Source: PeerJ journal article supplement (doi:10.7717/peerj.12994), 2022-03-09
Supplement: Supp_Figs_and_Tables_63721_JT_staff.zip [file Supp_Figs_and_Tables_63721_JT_staff.zip]

## Sheet: Sheet1
Category	Term	Count	%	PValue	Genes	List Total	Pop Hits	Pop Total	Fold Enrichment	Bonferroni	Benjamini	FDR
GOTERM_CC_DIRECT	GO:0005615~extracellular space	69	38.3333	1.79866e-31	APP, FLT1, ITGAM, CXCL8, SERPINE1, HSPB1, PLAT, C4BPA, CXCL1, HMGB1, TNF, ICAM1, PLAU, SMPD1, TIMP2, TNFSF10, TNFSF11, CTSG, TIMP1, IL10, EDN1, MMP7, IL15, HGF, MMP2, MST1, IL13, WNT5A, MMP3, APOA1, MIF, MMP9, TNFRSF1A, EEF1A1, IL1A, MMP13, IL1B, CAT, LTA, IAPP, IL6ST, CFB, GSTP1, PON1, CFI, PDGFB, RETN, EGFR, HSPD1, TTR, CCL2, HMOX1, APOE, APOB, ELANE, AOC1, EGF, IGF1, SELE, SOD3, AGT, IL2, SOD1…	180	1347	18224	5.18624	5.36001e-29	5.36001e-29	4.47867e-29
GOTERM_BP_DIRECT	GO:0043066~negative regulation of apoptotic process	40	22.2222	1.77099e-24	GSTP1, XIAP, HSPB1, FOXO1, RELA, EGFR, HSPD1, AQP1, IKBKB, MAPK8, IRAK1, MYC, CASP3, UCP2, AKT1, TIMP1, IL10, PDGFRB, WNT5A, STAT3, IGF1, MIF, MMP9, SIRT1, IL2, VEGFA, IL4, NFKBIA, IL6, PROC, RPS6KB1, LEP, CAT, BCL2, FAS, RAF1, IL6ST, TP53, BIRC2, BCL2L1	180	455	16792	8.20122	4.72501e-21	4.72324e-21	4.15298e-21
GOTERM_BP_DIRECT	GO:0048661~positive regulation of smooth muscle cell proliferation	20	11.1111	1.7438e-23	PDGFRB, JUN, EDN1, STAT1, IL13, PDGFB, CYBA, IGF1, RETN, PTGS2, TNF, EGFR, MTOR, IL6, IRAK1, RPS6KB1, MYC, AKT1, HMOX1, ELANE	180	60	16792	31.0963	4.65247e-20	2.32536e-20	2.04461e-20
GOTERM_BP_DIRECT	GO:0001666~response to hypoxia	27	15	9.35119e-23	PLAT, HIF1A, HSPD1, EDNRA, PLAU, CASP3, UCP2, CCL2, HMOX1, NOS1, EGR1, NOS2, CAV1, MMP2, CYBA, SOD3, VEGFA, MMP14, CREB1, LEP, CAT, CYP1A1, LTA, RAF1, PPARA, BIRC2, TLR2	180	172	16792	14.6442	2.4949e-19	8.31321e-20	7.30952e-20
GOTERM_MF_DIRECT	GO:0005515~protein binding	155	86.1111	3.27506e-22	APP, NCF1, CD81, ITGA2B, SERPINE1, PLAT, C4BPA, NR3C1, TNF, ICAM1, AQP1, EDNRA, TBK1, LAMP1, PLAU, MYC, GJA4, TNFSF10, AKT1, PDGFRB, G6PD, HGF, PRKCE, WNT5A, CYBB, RPSA, PRKCA, CYBA, MIF, SDHA, EEF1A1, COL4A1, DDIT3, TFAM, MASP2, RAF1, IL6ST, TP53, CFI, PDGFB, TXN, HIF1A, FOXO1, SOCS1, IRAK1, TERT, HMOX1, APOE, APOB, ELANE, ABCA1, DNAJC19, EGR1, JUN, INSR, CAV1, IGF1, SELE, NFKBIA, IL4, IL6, PROC…	180	8785	16881	1.65469	1.77181e-19	1.77508e-19	1.56876e-19
GOTERM_CC_DIRECT	GO:0005576~extracellular region	63	35	3.98895e-22	APP, CXCL8, SERPINE1, PLAT, C4BPA, CXCL1, HMGB1, TNF, PLAU, TIMP2, TNFSF10, TNFSF11, CTSG, TIMP1, IL10, EDN1, HSP90AA1, MMP7, IL15, MMP1, HGF, MMP2, MST1, IL13, WNT5A, MMP3, APOA1, MIF, MMP9, TNFRSF1A, MMP12, IL1A, MMP13, COL4A1, IL1B, IAPP, MASP2, IL6ST, CFB, C1S, PON1, CFI, PDGFB, ACAN, TTR, CCL2, APOE, APOB, ELANE, EGF, GZMA, IGF1, SOD3, AGT, IL2, SOD1, VEGFA, POMC, IL4, GZMM, IL6, PROC, LEP	180	1610	18224	3.96174	1.18871e-19	5.94353e-20	4.96624e-20
GOTERM_BP_DIRECT	GO:0045944~positive regulation of transcription from RNA polymerase II promoter	52	28.8889	4.31235e-22	APP, THRA, CD81, SERPINE1, HMGB1, NR3C1, TNF, IKBKB, TBK1, MYC, TNFSF11, AKT1, NOS1, IL10, EDN1, PARP1, HGF, WNT5A, SIRT1, TNFRSF1A, IL1A, CREB1, IRF4, IL1B, DDIT3, TFAM, PPARG, RAF1, PPARA, TLR4, TP53, TLR2, NR1I2, HIF1A, FOXO1, EGFR, RELA, MAPK3, EGR1, JUN, STAT1, STAT3, IGF1, MAPK14, IL2, VEGFA, NFKBIA, POMC, IL4, IL6, SP1, NFE2L2	180	981	16792	4.94498	1.15054e-18	2.87526e-19	2.52812e-19
GOTERM_BP_DIRECT	GO:0042493~response to drug	31	17.2222	1.1851e-20	PTGS2, RELA, HSPD1, AQP1, ICAM1, MYC, CASP3, SMPD1, TIMP2, BAK1, IL10, ABCA1, ABCC1, JUN, AOC1, HSP90AA1, STAT1, STAT3, CYBB, APOA1, CYBA, SOD1, IL4, IL6, CREB1, RPS6KB1, CAT, CYP1A1, LTA, BCL2, PPARG	180	304	16792	9.51301	3.16184e-17	6.3213e-18	5.5581e-18
GOTERM_MF_DIRECT	GO:0019899~enzyme binding	31	17.2222	1.38541e-19	APP, ATP2A2, PTGS2, HIF1A, EGFR, MAPK8, LAMP1, AKT1, HMOX1, RAC1, PDGFRB, JUN, PARP1, STAT1, PRKCE, CAV1, APOA1, PRKCA, MAPK14, SIRT1, SIRT3, NFKBIA, CD4, CREB1, CYP1A2, CAT, CYP1A1, PPARG, RAF1, TP53, HSPA1B	180	333	16881	8.73058	7.49508e-17	3.75447e-17	3.31806e-17
GOTERM_BP_DIRECT	GO:0007568~aging	24	13.3333	2.06951e-19	IL10, JUN, MMP7, IL15, STAT3, RETN, RELA, AGT, SIRT3, SOD1, CASP7, IL6, CREB1, IRAK1, RPS6KB1, CAT, UCP2, TIMP2, CYP1A1, CCL2, AKT1, BAK1, TIMP1, NFE2L2	180	165	16792	13.5693	5.52145e-16	9.19896e-17	8.08833e-17
GOTERM_MF_DIRECT	GO:0042802~identical protein binding	42	23.3333	1.46413e-18	APP, C1S, ITGA2B, PDGFB, XIAP, HSPB1, TNF, RELA, EGFR, CASP8, TTR, AKT1, MAPK1, BAK1, APOE, JUN, G6PD, HSP90AA1, PARP1, STAT1, HGF, CAV1, STAT3, APOA1, MMP9, SIRT1, SOD1, VEGFA, NFKBIA, DES, CREB1, IRF3, RPS6KB1, BCL2, BAX, FAS, PPARG, IAPP, VIM, RAF1, TP53, BCL2L1	180	749	16881	5.25888	7.92094e-16	2.6452e-16	2.33773e-16
GOTERM_BP_DIRECT	GO:0031663~lipopolysaccharide-mediated signaling pathway	14	7.77778	4.24302e-18	NOS3, PRKCE, MAPK14, TNF, NFKBIA, IRAK1, IRF3, IL1B, CCL2, AKT1, MAPK1, TLR4, TLR2, MAPK3	180	32	16792	40.8139	1.13204e-14	1.61659e-15	1.42141e-15
GOTERM_BP_DIRECT	GO:0071260~cellular response to mechanical stimulus	17	9.44444	2.62389e-17	MMP7, IL13, CYBA, PTGS2, EGFR, AGT, AQP1, TNFRSF1A, MAPK8, CASP8, IL1B, FAS, AKT1, BAK1, RAC1, TLR4, MAPK3	180	71	16792	22.3368	7.00054e-14	8.74739e-15	7.69128e-15
GOTERM_BP_DIRECT	GO:0006954~inflammatory response	30	16.6667	5.61317e-17	CXCL8, CXCL1, HMGB1, ITGAL, PTGS2, TNF, RELA, IKBKB, TBK1, CCL2, AKT1, RAC1, CCR5, IL10, AOC3, IL15, IL13, CYBB, CYBA, MIF, SELE, TNFRSF1A, IL1A, IL6, IL1B, IL2RA, FAS, TLR4, NFE2L2, TLR2	180	379	16792	7.38434	2.96208e-13	1.66337e-14	1.46254e-14
GOTERM_BP_DIRECT	GO:0071456~cellular response to hypoxia	18	10	1.9707e-16	EDN1, PRKCE, MST1, SLC2A4, PTGS2, HIF1A, SIRT1, MTOR, AQP1, ICAM1, VEGFA, IRAK1, TERT, BCL2, AKT1, HMOX1, TP53, NFE2L2	180	96	16792	17.4917	5.92415e-13	5.25586e-14	4.62129e-14
GOTERM_BP_DIRECT	GO:0045893~positive regulation of transcription, DNA-templated	33	18.3333	5.84548e-16	NR1I2, PDGFB, HIF1A, TNF, FOXO1, RELA, IKBKB, IRAK1, MYC, MAPK1, NOS1, MAPK3, IL10, EGR1, JUN, EGF, STAT1, INSR, WNT5A, STAT3, IGF1, AGT, IL4, IL6, CREB1, SP1, IRF4, IL1B, DDIT3, TFAM, PPARG, PPARA, TP53	180	515	16792	5.97773	1.48104e-12	1.41726e-13	1.24615e-13
GOTERM_BP_DIRECT	GO:0032496~response to lipopolysaccharide	21	11.6667	7.40209e-16	JUN, EDN1, IL13, CXCL1, PTGS2, SELE, HSPD1, TNFRSF1A, CASP8, IRAK1, RPS6KB1, CASP3, CYP1A2, CYP1A1, LTA, FAS, CTSG, APOB, TLR4, ELANE, TLR2	180	164	16792	11.9455	2.07345e-12	1.64511e-13	1.44649e-13
GOTERM_BP_DIRECT	GO:0045766~positive regulation of angiogenesis	18	10	4.80515e-15	FLT1, CXCL8, NOS3, HGF, WNT5A, SERPINE1, CYBB, HSPB1, PRKCA, HIF1A, SIRT1, AQP1, VEGFA, IL1A, TERT, IL1B, HMOX1, NFE2L2	180	115	16792	14.6017	1.27369e-11	9.85795e-13	8.66775e-13
GOTERM_CC_DIRECT	GO:0009986~cell surface	31	17.2222	1.28536e-14	APP, ITGAM, ITGA2B, PDGFB, PLAT, HMGB1, ITGAL, TNF, FUT4, EGFR, HSPD1, ICAM1, PLAU, TIMP2, CTSG, CCR5, ELANE, PDGFRB, AOC3, HSP90AA1, MMP7, IL15, WNT5A, APOA1, MIF, TNFRSF1A, VEGFA, RPS6KB1, FAS, TLR4, TLR2	180	542	18224	5.79073	3.83782e-12	1.27679e-12	1.06685e-12
GOTERM_BP_DIRECT	GO:0045429~positive regulation of nitric oxide biosynthetic process	13	7.22222	1.71183e-14	EDN1, HSP90AA1, INSR, PTGS2, TNF, EGFR, MTOR, AGT, ICAM1, IL6, IL1B, AKT1, TLR4	180	43	16792	28.2036	4.5616e-11	3.26104e-12	2.86732e-12
GOTERM_BP_DIRECT	GO:0045471~response to ethanol	17	9.44444	1.93842e-14	G6PD, GSTP1, IL13, STAT3, SLC2A4, IL2, ICAM1, SOD1, IL4, CASP8, RPS6KB1, MYC, LEP, CAT, CCL2, BAK1, BIRC2	180	105	16792	15.1039	5.18363e-11	3.4465e-12	3.03039e-12
GOTERM_BP_DIRECT	GO:0043065~positive regulation of apoptotic process	24	13.3333	1.27558e-13	PDGFRB, GZMA, HMGB1, PTGS2, SIRT1, TNF, FOXO1, HSPD1, SOD1, PTPA, IL6, MAPK8, CREB1, SMPD1, TNFSF10, LTA, FAS, BAX, AKT1, HMOX1, BAK1, RAC1, TP53, BCL2L1	180	300	16792	7.46311	3.40342e-10	2.12623e-11	1.86952e-11
GOTERM_BP_DIRECT	GO:0006915~apoptotic process	31	17.2222	3.37801e-13	NCF1, XIAP, NR3C1, FOXO1, CASP7, CASP8, CASP3, TNFSF10, MAPK1, MAPK3, STAT1, PRKCE, GZMA, GZMB, MAPK14, NFKBIA, IL1A, GZMM, IRF3, RPS6KB1, IL1B, IL2RA, DDIT3, LTA, BCL2, BAX, FAS, IAPP, RAF1, TP53, TLR2	180	567	16792	5.10045	9.01359e-10	5.2995e-11	4.65966e-11
GOTERM_MF_DIRECT	GO:0004252~serine-type endopeptidase activity	22	12.2222	3.58342e-13	MMP7, C1S, MMP1, HGF, GZMA, MMP2, CFI, MST1, MMP3, GZMB, PLAT, MMP9, MMP12, MMP14, GZMM, MMP13, PROC, PLAU, CTSG, MASP2, ELANE, CFB	180	255	16881	8.09111	1.93884e-10	4.85554e-11	4.29115e-11
GOTERM_BP_DIRECT	GO:0010628~positive regulation of gene expression	22	12.2222	6.71173e-13	CAV1, MST1, STAT3, NR1I2, PDGFB, MAPK14, HIF1A, TNF, MTOR, VEGFA, IL1A, IL6, MAPK8, MYC, IL1B, VIM, APOB, TP53, TLR4, HSPA1B, NFE2L2, TLR2	180	262	16792	7.83342	1.79057e-09	9.94454e-11	8.74389e-11
GOTERM_BP_DIRECT	GO:0071222~cellular response to lipopolysaccharide	16	8.88889	1.05321e-12	IL10, ABCA1, CXCL8, NOS2, GSTP1, WNT5A, SERPINE1, MAPK14, TNF, RELA, ICAM1, IL6, MAPK8, CCL2, CCR5, TLR4	180	113	16792	13.209	2.80982e-09	1.47837e-10	1.29988e-10
GOTERM_BP_DIRECT	GO:0042542~response to hydrogen peroxide	12	6.66667	4.87829e-12	PDGFRB, JUN, GPX1, STAT1, CASP3, CAT, BCL2, HMOX1, BAK1, SIRT1, HSPD1, SOD1	180	51	16792	21.9503	1.30154e-08	6.5052e-10	5.71979e-10
GOTERM_BP_DIRECT	GO:0032868~response to insulin	13	7.22222	5.35209e-12	IL10, EGR1, RETN, SIRT1, MTOR, RELA, IL6, RPS6KB1, LEP, CAT, TNFSF10, PPARA, TLR2	180	67	16792	18.1008	1.42793e-08	6.79716e-10	5.97651e-10
GOTERM_MF_DIRECT	GO:0005125~cytokine activity	18	10	5.50625e-12	IL10, EDN1, IL15, IL13, WNT5A, HMGB1, MIF, TNF, IL2, VEGFA, IL4, IL1A, IL6, IL1B, TNFSF10, LTA, TNFSF11, TIMP1	180	176	16881	9.59148	2.97889e-09	5.96878e-10	5.27499e-10
GOTERM_CC_DIRECT	GO:0070062~extracellular exosome	65	36.1111	1.59504e-11	APP, ITGAM, CD81, SERPINE1, ITGA2B, HSPB1, PLAT, SLC2A4, ITGAL, ICAM1, AQP1, LAMP1, PLAU, SMPD1, TIMP2, TNFSF10, CTSG, TIMP1, RAC1, PDGFRB, ABCC1, G6PD, HSP90AA1, GPX1, MMP7, MST1, WNT5A, APOA1, PRKCA, RPSA, MIF, MMP9, EEF1A1, IL1B, CAT, MASP2, DSG3, IL6ST, CFB, C1S, GSTP1, PON1, CFI, RETN, TXN, HSPD1, PTPA, TTR, MAPK1, APOE, APOB, ELANE, DECR1, MAPK3, AOC1, EGF, INSR, MAPK14, SOD3, AGT, SOD1, DE…	180	2811	18224	2.34112	4.75324e-09	1.18831e-09	9.92914e-10
GOTERM_CC_DIRECT	GO:0045121~membrane raft	18	10	2.11932e-11	ABCA1, APP, CAV1, SLC2A4, SELE, TNF, EGFR, HSPD1, ICAM1, TNFRSF1A, IKBKB, CD4, CASP8, CASP3, FAS, NOS1, BIRC2, TLR2	180	206	18224	8.8466	6.31556e-09	1.26311e-09	1.05542e-09
GOTERM_MF_DIRECT	GO:0046982~protein heterodimerization activity	26	14.4444	2.44859e-11	ITGAM, TYRP1, PDGFB, ITGAL, HIF1A, RELA, EGFR, PTPA, IKBKB, TTR, IRAK1, BAK1, AOC3, JUN, HGF, CAV1, CYBB, CYBA, VEGFA, DDIT3, BCL2, BAX, RAF1, TP53, BCL2L1, TLR2	180	465	16881	5.2438	1.32468e-08	2.21189e-09	1.95479e-09
GOTERM_BP_DIRECT	GO:0022617~extracellular matrix disassembly	13	7.22222	2.54799e-11	MMP7, MMP1, MMP2, MMP3, MMP9, MMP12, ACAN, MMP14, MMP13, TIMP2, CTSG, TIMP1, ELANE	180	76	16792	15.9573	6.79805e-08	2.95925e-09	2.60197e-09
GOTERM_BP_DIRECT	GO:0071407~cellular response to organic cyclic compound	12	6.66667	2.66299e-11	NFKBIA, CASP8, RPS6KB1, STAT1, IL1B, CASP3, STAT3, CYP1A1, CCL2, AKT1, CYBA, TNF	180	59	16792	18.974	7.10486e-08	2.95925e-09	2.60197e-09
GOTERM_BP_DIRECT	GO:0043406~positive regulation of MAP kinase activity	12	6.66667	2.66299e-11	PDGFRB, EDN1, FLT1, IRAK1, EGF, PDGFB, TNFSF11, MIF, TNF, EGFR, ELANE, VEGFA	180	59	16792	18.974	7.10486e-08	2.95925e-09	2.60197e-09
GOTERM_BP_DIRECT	GO:0046677~response to antibiotic	10	5.55556	3.29915e-11	AOC3, IL6, HSP90AA1, AOC1, CASP8, CASP3, CYP1A1, CCL2, TP53, SOD1	180	32	16792	29.1528	8.80213e-08	3.51954e-09	3.09461e-09
GOTERM_MF_DIRECT	GO:0042803~protein homodimerization activity	32	17.7778	3.40107e-11	PON1, TYRP1, ODC1, PDGFB, PTGS2, RELA, PTPA, IKBKB, IRAK1, TERT, HMOX1, BAK1, APOE, AOC3, JUN, AOC1, G6PD, HSP90AA1, NOS2, STAT1, GZMA, SOD1, VEGFA, CD4, IRF3, SP1, DDIT3, CAT, BCL2, BAX, IL6ST, BCL2L1	180	730	16881	4.11105	1.83998e-08	2.6334e-09	2.32731e-09
GOTERM_CC_DIRECT	GO:0005829~cytosol	71	39.4444	3.63424e-11	APP, THRA, NCF1, HSPB1, SLC2A4, IKBKB, CASP7, TBK1, CASP8, LAMP1, MYC, CASP3, AKT1, NOS1, RAC1, G6PD, HSP90AA1, GPX1, PRKCE, APOA1, PRKCA, RPSA, EEF1A1, IL1A, IRF3, IRF4, IL1B, DDIT3, CAT, TFAM, PPARG, DSG3, RAF1, TP53, BIRC2, GSTP1, ODC1, XIAP, TXN, HIF1A, FOXO1, RELA, HSPD1, MAPK8, SOCS1, IRAK1, HMOX1, MAPK1, BAK1, APOB, PDLIM5, MAPK3, JUN, NOS2, NOS3, STAT1, STAT3, GZMB, MAPK14, MTOR, SOD1, NF…	180	3315	18224	2.16843	1.083e-08	1.805e-09	1.50821e-09
GOTERM_BP_DIRECT	GO:1902042~negative regulation of extrinsic apoptotic signaling pathway via death domain receptors	10	5.55556	4.49502e-11	CASP8, GPX1, NOS3, HGF, SERPINE1, TNFSF10, FAS, HMOX1, RAF1, ICAM1	180	33	16792	28.2694	1.19927e-07	4.61085e-09	4.05416e-09
GOTERM_BP_DIRECT	GO:0097192~extrinsic apoptotic signaling pathway in absence of ligand	10	5.55556	6.05754e-11	IL4, IL1A, IL1B, CASP3, BCL2, FAS, BAX, BAK1, IL2, BCL2L1	180	34	16792	27.4379	1.61615e-07	5.9835e-09	5.26109e-09
GOTERM_CC_DIRECT	GO:0031012~extracellular matrix	20	11.1111	1.06411e-10	HSP90AA1, MMP7, MMP1, MMP2, SERPINE1, PDGFB, HSPB1, PLAT, SOD3, HSPD1, SOD1, ACAN, MMP14, MMP13, COL4A1, TIMP2, CTSG, VIM, RAC1, APOE	180	296	18224	6.84084	3.17103e-08	4.53005e-09	3.78518e-09
GOTERM_BP_DIRECT	GO:0000187~activation of MAPK activity	14	7.77778	1.1223e-10	CD81, EGF, HGF, INSR, WNT5A, IGF1, MAPK14, TNF, SOD1, IRAK1, IL1B, MAPK1, TLR4, MAPK3	180	107	16792	12.206	2.99429e-07	1.06899e-08	9.39926e-09
GOTERM_BP_DIRECT	GO:0006955~immune response	24	13.3333	1.32872e-10	IL10, CXCL8, IL15, GZMA, IL13, CXCL1, TNF, IL2, TNFRSF1A, IL4, IL1A, IL6, CD4, IL1B, IL2RA, TNFSF10, LTA, FAS, CCL2, TNFSF11, CTSG, CCR5, TLR4, TLR2	180	421	16792	5.31813	3.54503e-07	1.22197e-08	1.07443e-08
GOTERM_BP_DIRECT	GO:0051092~positive regulation of NF-kappaB transcription factor activity	15	8.33333	1.48994e-10	WNT5A, TNF, RELA, AGT, ICAM1, NFKBIA, IKBKB, IL6, IRAK1, IL1B, CAT, TNFSF11, TLR4, HSPA1B, TLR2	180	133	16792	10.5213	3.97516e-07	1.32456e-08	1.16464e-08
GOTERM_BP_DIRECT	GO:0008284~positive regulation of cell proliferation	25	13.8889	1.70684e-10	FLT1, CD81, ODC1, PDGFB, RELA, EGFR, MYC, MAPK1, TIMP1, PDGFRB, EDN1, IL15, EGF, HGF, INSR, STAT3, IGF1, SIRT1, IL2, VEGFA, IL6, LEP, BCL2, IL6ST, BCL2L1	180	466	16792	5.00477	4.55384e-07	1.46843e-08	1.29114e-08
GOTERM_BP_DIRECT	GO:0001525~angiogenesis	18	10	2.5778e-10	JUN, FLT1, CXCL8, NOS3, EGF, CAV1, MMP2, SERPINE1, PRKCA, PTGS2, MAPK14, HIF1A, SIRT1, VEGFA, MMP14, LEP, CCL2, HMOX1	180	223	16792	7.53004	6.87756e-07	2.14843e-08	1.88904e-08
GOTERM_BP_DIRECT	GO:0007165~signal transduction	39	21.6667	3.7683e-10	CXCL8, NR1I2, CXCL1, TXN, NR3C1, ITGAL, HIF1A, EGFR, EDNRA, IRAK1, PLAU, SMPD1, TNFSF10, CCL2, AKT1, MAPK1, PDGFRB, HSP90AA1, IL15, EGF, PRKCE, IL13, STAT3, IGF1, MAPK14, MTOR, TNFRSF1A, POMC, CD4, CREB1, RPS6KB1, IL1B, LEP, LTA, FAS, PPARG, IAPP, RAF1, TLR2	180	1161	16792	3.13374	1.00538e-06	3.04547e-08	2.67778e-08
GOTERM_BP_DIRECT	GO:0032869~cellular response to insulin stimulus	12	6.66667	5.38613e-10	PARP1, STAT1, SP1, MYC, GSTP1, INSR, UCP2, CCL2, AKT1, PPARG, SLC2A4, FOXO1	180	77	16792	14.5385	1.43702e-06	4.22494e-08	3.71484e-08
GOTERM_BP_DIRECT	GO:0050731~positive regulation of peptidyl-tyrosine phosphorylation	12	6.66667	1.07794e-09	IL6, CD4, CD81, HGF, PDGFB, IGF1, MIF, TP53, AGT, MTOR, ICAM1, VEGFA	180	82	16792	13.652	2.87595e-06	8.21393e-08	7.22222e-08
GOTERM_BP_DIRECT	GO:0009408~response to heat	10	5.55556	1.70408e-09	IL6, HSP90AA1, RPS6KB1, NOS3, CCL2, AKT1, IGF1, NOS1, HSPD1, SOD1	180	48	16792	19.4352	4.54649e-06	1.26244e-07	1.11002e-07
GOTERM_BP_DIRECT	GO:0001938~positive regulation of endothelial cell proliferation	11	6.11111	2.90762e-09	JUN, WNT5A, PDGFB, CCL2, AKT1, PRKCA, CYBA, HIF1A, SIRT1, MTOR, VEGFA	180	69	16792	14.8721	7.7575e-06	2.09584e-07	1.8428e-07
GOTERM_CC_DIRECT	GO:0009897~external side of plasma membrane	16	8.88889	3.04379e-09	ABCA1, IL13, ITGA2B, SLC2A4, TNF, ICAM1, IL4, IL6, CD4, SELL, LAMP1, IL2RA, FAS, CCR5, IL6ST, TLR4	180	213	18224	7.60522	9.07049e-07	1.13381e-07	9.4738e-08
GOTERM_BP_DIRECT	GO:0033138~positive regulation of peptidyl-serine phosphorylation	11	6.11111	3.36121e-09	IL6, TBK1, CAV1, WNT5A, BCL2, AKT1, MIF, TXN, RAF1, TNF, VEGFA	180	70	16792	14.6597	8.96768e-06	2.35904e-07	2.07422e-07
GOTERM_BP_DIRECT	GO:0006508~proteolysis	24	13.3333	3.72726e-09	MMP7, C1S, MMP1, HGF, MMP2, CFI, MST1, MMP3, PLAT, MMP9, MMP12, ACAN, MMP14, CASP7, GZMM, MMP13, CASP8, PROC, PLAU, CASP3, CTSG, MASP2, ELANE, CFB	180	500	16792	4.47787	9.94429e-06	2.54887e-07	2.24114e-07
GOTERM_BP_DIRECT	GO:0048146~positive regulation of fibroblast proliferation	10	5.55556	5.11506e-09	PDGFRB, JUN, MYC, WNT5A, PDGFB, IGF1, MIF, EGFR, AGT, AQP1	180	54	16792	17.2757	1.36469e-05	3.33137e-07	2.92916e-07
GOTERM_BP_DIRECT	GO:0050729~positive regulation of inflammatory response	11	6.11111	5.12135e-09	IL15, WNT5A, SERPINE1, CCL2, TLR4, EGFR, IL2, AGT, HSPD1, TLR2, TNFRSF1A	180	73	16792	14.0572	1.36637e-05	3.33137e-07	2.92916e-07
GOTERM_CC_DIRECT	GO:0005739~mitochondrion	38	21.1111	6.32731e-09	GSTP1, TXN, FOXO1, HSPD1, MAPK8, CASP8, MYC, AKT1, MAPK1, BAK1, NOS1, COA6, DECR1, MAPK3, DNAJC19, GPX1, PARP1, PRKCE, MMP2, CYBB, GZMB, PRKCA, CYBA, MAPK14, SDHA, SIRT1, TNFRSF1A, SIRT3, SOD1, RPS6KB1, CAT, CYP1A1, BCL2, BAX, TFAM, TP53, HSPA1B, BCL2L1	180	1331	18224	2.89053	1.88554e-06	2.09504e-07	1.75056e-07
GOTERM_BP_DIRECT	GO:0000302~response to reactive oxygen species	9	5	6.61459e-09	GPX1, GSTP1, CAT, CYBB, CYBA, APOE, TXN, SOD3, SOD1	180	39	16792	21.5282	1.76476e-05	4.20027e-07	3.69315e-07
GOTERM_BP_DIRECT	GO:0045840~positive regulation of mitotic nuclear division	8	4.44444	7.71e-09	PDGFRB, IL1A, EDN1, EGF, IL1B, INSR, PDGFB, IGF1	180	26	16792	28.7043	2.05701e-05	4.78199e-07	4.20464e-07
GOTERM_BP_DIRECT	GO:0045454~cell redox homeostasis	11	6.11111	8.71605e-09	IL6, GPX1, NCF1, NOS2, NOS3, DDIT3, CYBB, CYBA, NOS1, TXN, NFE2L2	180	77	16792	13.327	2.32542e-05	5.28312e-07	4.64526e-07
GOTERM_MF_DIRECT	GO:0008134~transcription factor binding	18	10	9.51333e-09	JUN, PARP1, THRA, STAT3, HMGB1, HIF1A, SIRT1, RELA, NFKBIA, SP1, IRF4, MYC, DDIT3, BCL2, MAPK1, PPARG, PPARA, TP53	180	284	16881	5.94401	5.1467e-06	6.44528e-07	5.69611e-07
GOTERM_BP_DIRECT	GO:0043123~positive regulation of I-kappaB kinase/NF-kappaB signaling	14	7.77778	1.79503e-08	PRKCE, TNF, RELA, TNFRSF1A, IKBKB, IL1A, CASP8, TBK1, IRAK1, IRF3, TNFSF10, TNFSF11, HMOX1, BIRC2	180	161	16792	8.11208	4.78902e-05	1.06385e-06	9.3541e-07
GOTERM_BP_DIRECT	GO:0032755~positive regulation of interleukin-6 production	9	5	2.19462e-08	IL1A, IL6, IL1B, WNT5A, CYBA, TNF, TLR4, HSPD1, TLR2	180	45	16792	18.6578	5.85508e-05	1.2724e-06	1.11878e-06
GOTERM_BP_DIRECT	GO:0071356~cellular response to tumor necrosis factor	12	6.66667	2.53611e-08	IKBKB, IL6, EDN1, CXCL8, CCL2, CYBA, SLC2A4, APOB, SIRT1, RELA, ICAM1, NFE2L2	180	110	16792	10.177	6.76612e-05	1.43911e-06	1.26536e-06
GOTERM_BP_DIRECT	GO:0006928~movement of cell or subcellular component	11	6.11111	2.5903e-08	CXCL8, STAT3, IL13, HSPB1, VIM, IGF1, RAC1, TXN, ITGAL, MAPK14, PTGS2	180	86	16792	11.9323	6.91067e-05	1.43923e-06	1.26547e-06
GOTERM_BP_DIRECT	GO:0008217~regulation of blood pressure	10	5.55556	2.78067e-08	POMC, EDN1, EDNRA, NOS3, LEP, HMOX1, PPARG, PTGS2, AGT, SOD1	180	65	16792	14.3521	7.41855e-05	1.48321e-06	1.30413e-06
GOTERM_BP_DIRECT	GO:0051384~response to glucocorticoid	10	5.55556	2.78067e-08	IL10, IL6, RPS6KB1, CASP3, BCL2, FAS, HMGB1, PTGS2, TNF, HSPD1	180	65	16792	14.3521	7.41855e-05	1.48321e-06	1.30413e-06
GOTERM_CC_DIRECT	GO:0005737~cytoplasm	87	48.3333	2.81495e-08	APP, NCF1, HSPB1, PLAT, NR3C1, AQP1, IKBKB, CASP7, TBK1, CASP8, LAMP1, CASP3, TNFSF11, AKT1, NOS1, RAC1, CCR5, IL10, PDGFRB, G6PD, EDN1, HSP90AA1, GPX1, IL15, PRKCE, IL13, PRKCA, RPSA, MIF, SIRT1, EEF1A1, MMP14, IRF3, IRF4, DDIT3, RAF1, TLR4, TP53, BIRC2, TLR2, GSTP1, ODC1, PDGFB, XIAP, TXN, PTGS2, HIF1A, FOXO1, EGFR, RELA, HSPD1, PTPA, SOCS1, TTR, IRAK1, MAPK1, APOE, APOB, PDLIM5, ELANE, DECR1, …	180	5222	18224	1.68676	8.38851e-06	8.38854e-07	7.00922e-07
GOTERM_BP_DIRECT	GO:0043200~response to amino acid	8	4.44444	2.94663e-08	IL6, EDN1, CASP3, GSTP1, CCL2, RELA, MTOR, ICAM1	180	31	16792	24.0746	7.86131e-05	1.51128e-06	1.32882e-06
GOTERM_BP_DIRECT	GO:0010332~response to gamma radiation	8	4.44444	2.94663e-08	GPX1, PARP1, MYC, BCL2, BAX, CCL2, BAK1, TP53	180	31	16792	24.0746	7.86131e-05	1.51128e-06	1.32882e-06
GOTERM_BP_DIRECT	GO:0045080~positive regulation of chemokine biosynthetic process	6	3.33333	3.14133e-08	IL4, EGR1, IL1B, WNT5A, HMOX1, TNF	180	10	16792	55.9733	8.38072e-05	1.58074e-06	1.38989e-06
GOTERM_BP_DIRECT	GO:0043536~positive regulation of blood vessel endothelial cell migration	7	3.88889	3.26247e-08	PDGFB, HSPB1, AKT1, PRKCA, MAPK14, NFE2L2, VEGFA	180	19	16792	34.3696	8.70388e-05	1.6113e-06	1.41676e-06
GOTERM_BP_DIRECT	GO:0032355~response to estradiol	11	6.11111	4.49065e-08	PDGFRB, CD4, CASP8, LEP, MYC, CASP3, GSTP1, STAT3, CYP1A2, CAT, PTGS2	180	91	16792	11.2767	0.000119803	2.17756e-06	1.91465e-06
GOTERM_BP_DIRECT	GO:0014911~positive regulation of smooth muscle cell migration	7	3.88889	4.61957e-08	PDGFRB, RPS6KB1, MYC, PDGFB, BCL2, IGF1, RETN	180	20	16792	32.6511	0.000123242	2.20007e-06	1.93444e-06
GOTERM_BP_DIRECT	GO:0070374~positive regulation of ERK1 and ERK2 cascade	14	7.77778	4.85762e-08	PDGFRB, JUN, PDGFB, PRKCA, HMGB1, MIF, TNF, EGFR, ICAM1, VEGFA, IL6, CCL2, TLR4, MAPK3	180	175	16792	7.46311	0.000129593	2.27285e-06	1.99844e-06
GOTERM_BP_DIRECT	GO:0048010~vascular endothelial growth factor receptor signaling pathway	10	5.55556	6.94507e-08	HSP90AA1, FLT1, NCF1, CYBB, HSPB1, CCL2, CYBA, RAC1, MAPK14, VEGFA	180	72	16792	12.9568	0.000185277	3.19353e-06	2.80796e-06
GOTERM_BP_DIRECT	GO:0008283~cell proliferation	19	10.5556	7.65621e-08	CD81, STAT3, CXCL1, IGF1, MIF, TXN, EGFR, IL1A, EDNRA, MYC, IL2RA, CYP1A1, BCL2, AKT1, BAK1, RAC1, RAF1, TP53, BCL2L1	180	366	16792	4.84287	0.000204247	3.46087e-06	3.04302e-06
GOTERM_CC_DIRECT	GO:0005886~plasma membrane	73	40.5556	8.76528e-08	APP, FLT1, ITGAM, CD81, SERPINE1, ITGA2B, HSPB1, C4BPA, HMGB1, SLC2A4, ITGAL, TNF, ICAM1, AQP1, EDNRA, LAMP1, PLAU, CASP3, SMPD1, TNFSF11, AKT1, CTSG, RAC1, CCR5, COA6, PDGFRB, ABCC1, HSP90AA1, PRKCE, MMP2, WNT5A, CYBB, APOA1, PRKCA, RPSA, CYBA, TNFRSF1A, MMP14, CAT, LTA, DSG3, RAF1, IL6ST, TLR4, CFB, TLR2, GSTP1, EGFR, HSPD1, IRAK1, TERT, HMOX1, APOE, APOB, ABCA1, AOC3, AOC1, EGF, NOS3, INSR, CA…	180	4121	18224	1.79346	2.61202e-05	2.37459e-06	1.98414e-06
GOTERM_BP_DIRECT	GO:2001240~negative regulation of extrinsic apoptotic signaling pathway in absence of ligand	8	4.44444	1.09314e-07	IL1A, TERT, IL1B, BCL2, AKT1, TNF, HSPA1B, BCL2L1	180	37	16792	20.1706	0.000291608	4.85901e-06	4.27236e-06
GOTERM_BP_DIRECT	GO:0002576~platelet degranulation	11	6.11111	1.47654e-07	APP, EGF, HGF, ITGA2B, SERPINE1, PDGFB, APOA1, TIMP1, IGF1, SOD1, VEGFA	180	103	16792	9.96289	0.000393862	6.45561e-06	5.67619e-06
GOTERM_BP_DIRECT	GO:0070371~ERK1 and ERK2 cascade	7	3.88889	1.54835e-07	EGF, TNFSF11, MAPK1, APOA1, IGF1, AGT, MAPK3	180	24	16792	27.2093	0.000413014	6.66039e-06	5.85625e-06
GOTERM_MF_DIRECT	GO:0008083~growth factor activity	13	7.22222	1.57713e-07	IL10, EGF, HGF, PDGFB, CXCL1, IGF1, IL2, AGT, VEGFA, IL4, IL6, LEP, TIMP1	180	162	16881	7.52582	8.53188e-05	9.4978e-06	8.39381e-06
GOTERM_BP_DIRECT	GO:1901215~negative regulation of neuron death	8	4.44444	1.9269e-07	IL6, CREB1, STAT3, IL13, AKT1, APOE, PPARA, SIRT1	180	40	16792	18.6578	0.000513964	8.1572e-06	7.17234e-06
GOTERM_BP_DIRECT	GO:0043410~positive regulation of MAPK cascade	10	5.55556	1.96085e-07	IL6, FLT1, LEP, INSR, PRKCE, PDGFB, TIMP2, FAS, IGF1, HMGB1	180	81	16792	11.5171	0.000523018	8.17123e-06	7.18468e-06
GOTERM_BP_DIRECT	GO:0007569~cell aging	7	3.88889	2.01934e-07	BCL2, MIF, SIRT1, TP53, MTOR, ICAM1, SOD1	180	25	16792	26.1209	0.000538616	8.28553e-06	7.28517e-06
GOTERM_CC_DIRECT	GO:0005901~caveola	9	5	2.31964e-07	NOS3, CAV1, INSR, HMOX1, MAPK1, NOS1, PTGS2, SELE, MAPK3	180	65	18224	14.0185	6.91228e-05	5.76043e-06	4.81325e-06
GOTERM_BP_DIRECT	GO:0050999~regulation of nitric-oxide synthase activity	7	3.88889	2.60202e-07	HSP90AA1, NOS3, LEP, IL1B, CAV1, AKT1, EGFR	180	26	16792	25.1162	0.000693978	1.03576e-05	9.10706e-06
GOTERM_BP_DIRECT	GO:0032757~positive regulation of interleukin-8 production	7	3.88889	2.60202e-07	DDIT3, IL1B, SERPINE1, TNF, TLR4, HSPA1B, TLR2	180	26	16792	25.1162	0.000693978	1.03576e-05	9.10706e-06
GOTERM_BP_DIRECT	GO:0001541~ovarian follicle development	8	4.44444	2.73871e-07	MMP14, MYC, BCL2, BAX, BCL2L1, ICAM1, SOD1, VEGFA	180	42	16792	17.7693	0.000730422	1.07414e-05	9.44453e-06
GOTERM_BP_DIRECT	GO:0009636~response to toxic substance	10	5.55556	2.98365e-07	PDGFRB, RPS6KB1, GSTP1, PON1, BCL2, FAS, BAX, MAPK1, TLR2, MAPK3	180	85	16792	10.9752	0.000795721	1.15325e-05	1.01401e-05
GOTERM_MF_DIRECT	GO:0051721~protein phosphatase 2A binding	7	3.88889	3.21561e-07	PTPA, RPS6KB1, STAT1, BCL2, AKT1, TP53, FOXO1	180	27	16881	24.3142	0.000173949	1.74286e-05	1.54028e-05
GOTERM_BP_DIRECT	GO:0014823~response to activity	8	4.44444	3.24201e-07	IL10, EDN1, CREB1, LEP, CAT, CCL2, CYBA, HSPD1	180	43	16792	17.3561	0.000864594	1.23521e-05	1.08607e-05
GOTERM_BP_DIRECT	GO:1904707~positive regulation of vascular smooth muscle cell proliferation	6	3.33333	3.58474e-07	IL10, TERT, MMP2, PDGFB, MMP9, AGT	180	15	16792	37.3156	0.00095595	1.34655e-05	1.18397e-05
GOTERM_BP_DIRECT	GO:0030574~collagen catabolic process	9	5	3.79307e-07	MMP12, MMP14, MMP13, MMP7, COL4A1, MMP1, MMP2, MMP3, MMP9	180	64	16792	13.1188	0.00101148	1.40501e-05	1.23538e-05
GOTERM_BP_DIRECT	GO:2000352~negative regulation of endothelial cell apoptotic process	7	3.88889	4.18316e-07	IL10, IL4, TERT, IL13, SERPINE1, ICAM1, NFE2L2	180	28	16792	23.3222	0.00111545	1.50419e-05	1.32258e-05
GOTERM_BP_DIRECT	GO:0043388~positive regulation of DNA binding	7	3.88889	4.18316e-07	IRF4, EGF, MYC, IGF1, HMGB1, TXN, MMP9	180	28	16792	23.3222	0.00111545	1.50419e-05	1.32258e-05
GOTERM_BP_DIRECT	GO:0014068~positive regulation of phosphatidylinositol 3-kinase signaling	9	5	4.2864e-07	PDGFRB, FLT1, LEP, HGF, CAT, PDGFB, IGF1, SIRT1, AGT	180	65	16792	12.9169	0.00114296	1.50419e-05	1.32258e-05
GOTERM_BP_DIRECT	GO:0043627~response to estrogen	9	5	4.2864e-07	PDGFRB, MMP14, HSP90AA1, CAV1, HMOX1, MAPK1, APOA1, PPARG, HSPD1	180	65	16792	12.9169	0.00114296	1.50419e-05	1.32258e-05
GOTERM_BP_DIRECT	GO:0035994~response to muscle stretch	6	3.33333	5.16921e-07	NFKBIA, EDN1, JUN, RAF1, MAPK14, RELA	180	16	16792	34.9833	0.0013782	1.76747e-05	1.55408e-05
GOTERM_BP_DIRECT	GO:0010613~positive regulation of cardiac muscle hypertrophy	6	3.33333	5.16921e-07	EDN1, PARP1, PRKCA, IGF1, IL6ST, AGT	180	16	16792	34.9833	0.0013782	1.76747e-05	1.55408e-05
GOTERM_BP_DIRECT	GO:0008630~intrinsic apoptotic signaling pathway in response to DNA damage	8	4.44444	6.10429e-07	BCL2, BAX, HMOX1, BAK1, SIRT1, TNF, BCL2L1, TNFRSF1A	180	47	16792	15.879	0.0016273	2.03664e-05	1.79075e-05
GOTERM_BP_DIRECT	GO:0008203~cholesterol metabolic process	9	5	6.10916e-07	ABCA1, IL4, APP, LEP, PON1, CAT, APOA1, APOE, APOB	180	68	16792	12.3471	0.0016286	2.03664e-05	1.79075e-05
GOTERM_BP_DIRECT	GO:2000379~positive regulation of reactive oxygen species metabolic process	7	3.88889	6.47742e-07	PDGFRB, LEP, PDGFB, MAPK14, TP53, AGT, NFE2L2	180	30	16792	21.7674	0.00172668	2.13275e-05	1.87525e-05
GOTERM_BP_DIRECT	GO:0030335~positive regulation of cell migration	13	7.22222	6.613e-07	PDGFRB, EDN1, FLT1, HGF, INSR, PDGFB, PRKCA, IGF1, EGFR, VEGFA, MMP14, PLAU, MAPK1	180	184	16792	6.59106	0.00176279	2.15084e-05	1.89116e-05
GOTERM_BP_DIRECT	GO:0050900~leukocyte migration	11	6.11111	7.24674e-07	ITGAM, PROC, SELL, MMP1, CAV1, MIF, APOB, ITGAL, SELE, MMP9, ICAM1	180	122	16792	8.41129	0.00193156	2.32856e-05	2.04742e-05
GOTERM_CC_DIRECT	GO:0048471~perinuclear region of cytoplasm	22	12.2222	8.32245e-07	ABCA1, APP, HSP90AA1, NOS2, STAT1, PRKCE, CAV1, ODC1, CYBB, ATP2A2, PRKCA, SLC2A4, SELE, EGFR, LAMP1, RPS6KB1, CCL2, HMOX1, PPARG, NOS1, TLR4, HSPA1B	180	621	18224	3.58676	0.000247978	1.90776e-05	1.59407e-05
GOTERM_BP_DIRECT	GO:0000165~MAPK cascade	15	8.33333	8.55638e-07	PDGFRB, EGF, CAV1, PDGFB, TNF, EGFR, IL2, MYC, IL1B, IL2RA, CCL2, MAPK1, RAF1, CCR5, MAPK3	180	262	16792	5.34097	0.00228024	2.71665e-05	2.38866e-05
GOTERM_BP_DIRECT	GO:0018105~peptidyl-serine phosphorylation	11	6.11111	9.0731e-07	MAPK8, TBK1, PRKCE, PDGFB, BCL2, MAPK1, AKT1, PRKCA, MAPK14, MTOR, MAPK3	180	125	16792	8.20942	0.00241778	2.84682e-05	2.50311e-05
GOTERM_BP_DIRECT	GO:0001934~positive regulation of protein phosphorylation	11	6.11111	1.05033e-06	IL1B, INSR, AKT1, RAC1, SIRT1, TNF, MMP9, EGFR, MTOR, MAPK3, VEGFA	180	127	16792	8.08014	0.00279836	3.25724e-05	2.86398e-05
GOTERM_CC_DIRECT	GO:0031093~platelet alpha granule lumen	8	4.44444	1.06942e-06	APP, EGF, HGF, SERPINE1, PDGFB, TIMP1, IGF1, VEGFA	180	55	18224	14.7265	0.000318636	2.27633e-05	1.90203e-05
GOTERM_MF_DIRECT	GO:0005102~receptor binding	17	9.44444	1.15448e-06	PDGFRB, ABCA1, APP, NOS2, CAV1, SERPINE1, CXCL1, PLAT, MIF, POMC, PTPA, CAT, TNFSF10, LTA, CCL2, IAPP, HSPA1B	180	353	16881	4.51648	0.000624381	5.68846e-05	5.02725e-05
GOTERM_BP_DIRECT	GO:0007584~response to nutrient	9	5	1.17969e-06	ABCA1, IL4, RPS6KB1, STAT1, LTA, CYBB, APOA1, PPARG, MTOR	180	74	16792	11.3459	0.00314247	3.61637e-05	3.17974e-05
GOTERM_BP_DIRECT	GO:0034097~response to cytokine	8	4.44444	1.24157e-06	IL4, JUN, STAT1, BCL2, TIMP2, TIMP1, IL6ST, BCL2L1	180	52	16792	14.3521	0.00330702	3.7628e-05	3.3085e-05
GOTERM_BP_DIRECT	GO:0032930~positive regulation of superoxide anion generation	5	2.77778	1.50904e-06	GSTP1, CYBA, EGFR, AGT, SOD1	180	9	16792	51.8272	0.00401804	4.4718e-05	3.93189e-05
GOTERM_BP_DIRECT	GO:0050665~hydrogen peroxide biosynthetic process	5	2.77778	1.50904e-06	CYP1A2, CYP1A1, CYBB, CYBA, SOD1	180	9	16792	51.8272	0.00401804	4.4718e-05	3.93189e-05
GOTERM_CC_DIRECT	GO:0005925~focal adhesion	17	9.44444	1.63933e-06	PDGFRB, FLT1, CD81, CAV1, ITGA2B, HSPB1, CYBA, EGFR, ICAM1, MMP14, PLAU, CAT, MAPK1, VIM, RAC1, HSPA1B, MAPK3	180	391	18224	4.40193	0.0004884	3.25679e-05	2.72128e-05
GOTERM_BP_DIRECT	GO:1902895~positive regulation of pri-miRNA transcription from RNA polymerase II promoter	6	3.33333	1.77237e-06	JUN, TERT, STAT3, PDGFB, HIF1A, RELA	180	20	16792	27.9867	0.00471751	5.19439e-05	4.56725e-05
GOTERM_BP_DIRECT	GO:0050728~negative regulation of inflammatory response	9	5	1.95165e-06	PROC, IL2RA, HGF, APOA1, APOE, PPARA, IL2, ELANE, TNFRSF1A	180	79	16792	10.6278	0.00519348	5.65767e-05	4.97459e-05
GOTERM_MF_DIRECT	GO:0005507~copper ion binding	8	4.44444	2.00567e-06	AOC3, IL1A, AOC1, TYRP1, TP53, SOD3, COA6, SOD1	180	56	16881	13.3976	0.00108448	9.05895e-05	8.00597e-05
GOTERM_BP_DIRECT	GO:0010629~negative regulation of gene expression	11	6.11111	2.10136e-06	TBK1, CREB1, TERT, NOS2, PDGFB, AKT1, BAK1, MIF, SIRT1, TNF, AGT	180	137	16792	7.49035	0.00559075	6.02616e-05	5.29859e-05
GOTERM_BP_DIRECT	GO:0042060~wound healing	9	5	2.14896e-06	PDGFRB, IL6, CASP3, WNT5A, TIMP1, RAF1, PPARA, EGFR, MTOR	180	80	16792	10.495	0.00571703	6.0971e-05	5.36097e-05
GOTERM_BP_DIRECT	GO:0046902~regulation of mitochondrial membrane permeability	5	2.77778	2.49413e-06	STAT3, BCL2, BAK1, TP53, BCL2L1	180	10	16792	46.6444	0.00663225	7.00194e-05	6.15656e-05
GOTERM_CC_DIRECT	GO:0016020~membrane	45	25	2.61379e-06	CD81, CFI, PDGFB, ATP2A2, SLC2A4, ITGAL, TNF, FUT4, EGFR, HSPD1, ICAM1, LAMP1, TNFSF11, HMOX1, APOE, RAC1, PDLIM5, PDGFRB, ABCC1, G6PD, HSP90AA1, PARP1, IL15, HGF, CAV1, INSR, GZMB, RPSA, CYBA, SDHA, MTOR, VEGFA, EEF1A1, CD4, GZMM, SELL, IRF4, CAT, LTA, BCL2, BAX, FAS, IL6ST, RECK, BCL2L1	180	2200	18224	2.07091	0.000778607	4.86818e-05	4.06771e-05
GOTERM_BP_DIRECT	GO:0051897~positive regulation of protein kinase B signaling	9	5	3.11695e-06	IL6, GPX1, LEP, INSR, TNFSF11, TXN, TNF, EGFR, MTOR	180	84	16792	9.99524	0.00828157	8.65929e-05	7.61381e-05
GOTERM_CC_DIRECT	GO:0043234~protein complex	17	9.44444	3.21762e-06	DNAJC19, HSP90AA1, PARP1, CAV1, ATP2A2, PTGS2, NR3C1, HSPD1, SOD1, TTR, MYC, AKT1, MAPK1, NOS1, TP53, BIRC2, MAPK3	180	412	18224	4.17756	0.000958392	5.64029e-05	4.71286e-05
GOTERM_BP_DIRECT	GO:0030890~positive regulation of B cell proliferation	7	3.88889	3.287e-06	IL4, CD81, IL13, BCL2, MIF, TLR4, IL2	180	39	16792	16.7442	0.00873139	9.03756e-05	7.94641e-05
GOTERM_BP_DIRECT	GO:0007267~cell-cell signaling	14	7.77778	3.4235e-06	IL10, EDN1, IL15, IL13, TXN, IL2, AGT, POMC, IL1B, GJA4, TNFSF10, LTA, IAPP, CCR5	180	254	16792	5.14191	0.00909234	9.31682e-05	8.19196e-05
GOTERM_BP_DIRECT	GO:0032733~positive regulation of interleukin-10 production	6	3.33333	3.74814e-06	IL4, HGF, HMGB1, TLR4, HSPD1, TLR2	180	23	16792	24.3362	0.00995022	0.000100973	8.87816e-05
GOTERM_BP_DIRECT	GO:0007566~embryo implantation	7	3.88889	5.14681e-06	IL1B, MMP2, MST1, PTGS2, RECK, MMP9, SOD1	180	42	16792	15.5481	0.0136379	0.000135906	0.000119498
GOTERM_BP_DIRECT	GO:0045740~positive regulation of DNA replication	7	3.88889	5.14681e-06	IL6, JUN, INSR, PDGFB, IGF1, RAC1, EGFR	180	42	16792	15.5481	0.0136379	0.000135906	0.000119498
GOTERM_BP_DIRECT	GO:0032727~positive regulation of interferon-alpha production	5	2.77778	5.78157e-06	TBK1, IRF3, HMGB1, TLR4, HSPD1	180	12	16792	38.8704	0.0153069	0.000150613	0.000132429
GOTERM_BP_DIRECT	GO:0051090~regulation of sequence-specific DNA binding transcription factor activity	6	3.33333	5.8167e-06	JUN, MAPK8, HMOX1, MAPK1, MAPK14, MAPK3	180	25	16792	22.3893	0.0153992	0.000150613	0.000132429
GOTERM_MF_DIRECT	GO:0008201~heparin binding	11	6.11111	8.05913e-06	APP, AOC1, MMP7, SELL, CCL2, CTSG, APOE, APOB, SOD3, ELANE, VEGFA	180	160	16881	6.4476	0.00435052	0.000336004	0.000296948
GOTERM_CC_DIRECT	GO:0030141~secretory granule	8	4.44444	8.10727e-06	POMC, IL1B, CTSG, PLAT, CYBA, ELANE, HSPD1, VEGFA	180	74	18224	10.9453	0.00241306	0.00013422	0.000112151
GOTERM_BP_DIRECT	GO:0030198~extracellular matrix organization	12	6.66667	8.32703e-06	ACAN, APP, ITGAM, TTR, COL4A1, ITGA2B, SERPINE1, PDGFB, ITGAL, RECK, TNF, ICAM1	180	196	16792	5.71156	0.0219716	0.00021354	0.000187758
GOTERM_BP_DIRECT	GO:0043154~negative regulation of cysteine-type endopeptidase activity involved in apoptotic process	8	4.44444	8.59792e-06	IL6, GPX1, HGF, XIAP, AKT1, RAF1, AQP1, VEGFA	180	69	16792	10.8161	0.0226782	0.000216327	0.000190209
GOTERM_BP_DIRECT	GO:0035690~cellular response to drug	8	4.44444	8.59792e-06	EDN1, NOS2, MYC, IL1B, CCL2, TP53, EGFR, NFE2L2	180	69	16792	10.8161	0.0226782	0.000216327	0.000190209
GOTERM_BP_DIRECT	GO:0032729~positive regulation of interferon-gamma production	7	3.88889	8.87129e-06	IL1B, WNT5A, LTA, TNF, TLR4, IL2, HSPD1	180	46	16792	14.1961	0.0233908	0.000221119	0.000194422
GOTERM_BP_DIRECT	GO:0097190~apoptotic signaling pathway	8	4.44444	1.04101e-05	CASP8, CASP3, CAV1, FAS, BAX, PRKCA, BAK1, TLR4	180	71	16792	10.5114	0.0273921	0.000251911	0.000221497
GOTERM_BP_DIRECT	GO:0071347~cellular response to interleukin-1	8	4.44444	1.04101e-05	IL6, EDN1, CXCL8, MYC, CCL2, HIF1A, RELA, ICAM1	180	71	16792	10.5114	0.0273921	0.000251911	0.000221497
GOTERM_BP_DIRECT	GO:0035666~TRIF-dependent toll-like receptor signaling pathway	6	3.33333	1.04845e-05	IKBKB, TBK1, CASP8, IRF3, TLR4, BIRC2	180	28	16792	19.9905	0.0275852	0.000251911	0.000221497
GOTERM_BP_DIRECT	GO:0051881~regulation of mitochondrial membrane potential	6	3.33333	1.04845e-05	UCP2, BCL2, BAX, BAK1, BCL2L1, SOD1	180	28	16792	19.9905	0.0275852	0.000251911	0.000221497
GOTERM_BP_DIRECT	GO:0019221~cytokine-mediated signaling pathway	10	5.55556	1.12637e-05	IL1A, IL6, SOCS1, IL1B, STAT3, TNFSF11, CCL2, IL6ST, RELA, TNFRSF1A	180	131	16792	7.12129	0.0296048	0.000262094	0.00023045
GOTERM_BP_DIRECT	GO:0042554~superoxide anion generation	5	2.77778	1.14979e-05	EDN1, NCF1, CYBB, CYBA, SOD1	180	14	16792	33.3175	0.0302109	0.000262094	0.00023045
GOTERM_BP_DIRECT	GO:0035729~cellular response to hepatocyte growth factor stimulus	5	2.77778	1.14979e-05	IL10, IL6, CREB1, HGF, RELA	180	14	16792	33.3175	0.0302109	0.000262094	0.00023045
GOTERM_BP_DIRECT	GO:0010875~positive regulation of cholesterol efflux	5	2.77778	1.14979e-05	ABCA1, NFKBIA, PON1, APOE, SIRT1	180	14	16792	33.3175	0.0302109	0.000262094	0.00023045
GOTERM_BP_DIRECT	GO:0070498~interleukin-1-mediated signaling pathway	5	2.77778	1.14979e-05	IKBKB, IL1A, EGR1, IRAK1, MAPK3	180	14	16792	33.3175	0.0302109	0.000262094	0.00023045
GOTERM_BP_DIRECT	GO:1902176~negative regulation of oxidative stress-induced intrinsic apoptotic signaling pathway	5	2.77778	1.14979e-05	GPX1, HSPB1, AKT1, SIRT1, NFE2L2	180	14	16792	33.3175	0.0302109	0.000262094	0.00023045
GOTERM_MF_DIRECT	GO:0019901~protein kinase binding	16	8.88889	1.17928e-05	PDGFRB, PARP1, CAV1, STAT3, HSPB1, HIF1A, EGFR, MTOR, RELA, EEF1A1, IKBKB, CD4, SOCS1, RAC1, TP53, BCL2L1	180	376	16881	3.99078	0.00635962	0.00041482	0.000366603
GOTERM_MF_DIRECT	GO:0002020~protease binding	9	5	1.19299e-05	SELL, CASP3, SERPINE1, BCL2, TIMP2, TIMP1, TNF, TP53, ELANE	180	101	16881	8.35693	0.00643336	0.00041482	0.000366603
GOTERM_BP_DIRECT	GO:0043524~negative regulation of neuron apoptotic process	10	5.55556	1.19784e-05	JUN, TERT, BCL2, BAX, HMOX1, CCL2, APOE, HSPD1, BCL2L1, SOD1	180	132	16792	7.06734	0.0314532	0.000270731	0.000238045
GOTERM_MF_DIRECT	GO:0005164~tumor necrosis factor receptor binding	6	3.33333	1.22456e-05	CASP8, STAT1, LTA, TNFSF10, TNFSF11, TNF	180	29	16881	19.4034	0.00660303	0.00041482	0.000366603
GOTERM_BP_DIRECT	GO:0042593~glucose homeostasis	9	5	1.23901e-05	POMC, IL6, LEP, INSR, STAT3, AKT1, PPARG, SLC2A4, HIF1A	180	101	16792	8.31287	0.0325165	0.000274566	0.000241417
GOTERM_BP_DIRECT	GO:0045909~positive regulation of vasodilation	6	3.33333	1.25598e-05	NOS2, NOS3, HMOX1, NOS1, EGFR, AGT	180	29	16792	19.3011	0.0329546	0.000274566	0.000241417
GOTERM_BP_DIRECT	GO:0071549~cellular response to dexamethasone stimulus	6	3.33333	1.25598e-05	IL6, RPS6KB1, CCL2, FOXO1, EGFR, AQP1	180	29	16792	19.3011	0.0329546	0.000274566	0.000241417
GOTERM_BP_DIRECT	GO:0097421~liver regeneration	6	3.33333	1.25598e-05	IL10, NFKBIA, MYC, UCP2, HMOX1, EGFR	180	29	16792	19.3011	0.0329546	0.000274566	0.000241417
GOTERM_BP_DIRECT	GO:0006974~cellular response to DNA damage stimulus	12	6.66667	1.45811e-05	IRF3, PARP1, MYC, DDIT3, BCL2, MAPK1, XIAP, AKT1, SIRT1, TP53, FOXO1, MAPK3	180	208	16792	5.38205	0.0381556	0.00031616	0.000277988
GOTERM_BP_DIRECT	GO:0046326~positive regulation of glucose import	6	3.33333	1.49423e-05	TERT, INSR, AKT1, IGF1, MAPK14, NFE2L2	180	30	16792	18.6578	0.0390821	0.000321379	0.000282578
GOTERM_MF_DIRECT	GO:0020037~heme binding	10	5.55556	1.55053e-05	NOS2, NOS3, CYP1A2, CAT, CYP1A1, CYBB, HMOX1, CYBA, NOS1, PTGS2	180	137	16881	6.8455	0.00835336	0.000494346	0.000436885
GOTERM_BP_DIRECT	GO:0051091~positive regulation of sequence-specific DNA binding transcription factor activity	9	5	1.6487e-05	IL10, IL4, IL6, EDN1, IL1B, TNFSF11, AKT1, PPARG, TNF	180	105	16792	7.99619	0.0430342	0.000351766	0.000309296
GOTERM_MF_DIRECT	GO:0044212~transcription regulatory region DNA binding	12	6.66667	1.73319e-05	JUN, CREB1, THRA, SP1, DDIT3, WNT5A, STAT3, PPARG, TNF, TP53, RELA, NFE2L2	180	213	16881	5.28357	0.00933282	0.000521883	0.000461221
GOTERM_BP_DIRECT	GO:0016032~viral process	14	7.77778	1.98316e-05	MMP1, STAT3, SIRT1, HSPD1, TNFRSF1A, NFKBIA, CREB1, SP1, BAX, MAPK1, VIM, IL6ST, TP53, MAPK3	180	299	16792	4.36804	0.0515359	0.00041977	0.000369089
GOTERM_BP_DIRECT	GO:0044130~negative regulation of growth of symbiont in host	5	2.77778	2.05592e-05	IL10, LTA, CTSG, TNF, ELANE	180	16	16792	29.1528	0.0533752	0.000431743	0.000379617
GOTERM_BP_DIRECT	GO:0006979~response to oxidative stress	9	5	2.31566e-05	APP, MMP14, GPX1, HMOX1, AKT1, APOE, PTGS2, SIRT1, EGFR	180	110	16792	7.63273	0.0599127	0.00048249	0.000424236
GOTERM_BP_DIRECT	GO:0043491~protein kinase B signaling	6	3.33333	2.42496e-05	RPS6KB1, IL1B, CCL2, AKT1, IGF1, TNF	180	33	16792	16.9616	0.0626502	0.000501346	0.000440816
GOTERM_BP_DIRECT	GO:0090201~negative regulation of release of cytochrome c from mitochondria	5	2.77778	2.66617e-05	GPX1, HGF, AKT1, IGF1, BCL2L1	180	17	16792	27.4379	0.0686633	0.000538688	0.00047365
GOTERM_BP_DIRECT	GO:0032722~positive regulation of chemokine production	5	2.77778	2.66617e-05	IL6, HIF1A, TNF, TLR4, TLR2	180	17	16792	27.4379	0.0686633	0.000538688	0.00047365
GOTERM_BP_DIRECT	GO:0070542~response to fatty acid	5	2.77778	2.66617e-05	PON1, UCP2, CAT, PTGS2, TLR2	180	17	16792	27.4379	0.0686633	0.000538688	0.00047365
GOTERM_BP_DIRECT	GO:0006919~activation of cysteine-type endopeptidase activity involved in apoptotic process	8	4.44444	2.91928e-05	CASP8, CASP3, TNFSF10, FAS, BAX, PPARG, TNF, HSPD1	180	83	16792	8.9917	0.0749316	0.000585393	0.000514715
GOTERM_BP_DIRECT	GO:0042127~regulation of cell proliferation	11	6.11111	3.00669e-05	NFKBIA, JUN, NOS2, PLAU, FAS, XIAP, SIRT1, TNF, AGT, BIRC2, TNFRSF1A	180	185	16792	5.54691	0.0770864	0.00059842	0.00052617
GOTERM_BP_DIRECT	GO:0007155~cell adhesion	17	9.44444	3.35789e-05	AOC3, APP, ITGAM, PRKCE, ITGA2B, ATP2A2, PRKCA, RPSA, ITGAL, SELE, IL2, ICAM1, ACAN, CD4, SELL, CCL2, RAC1	180	459	16792	3.45514	0.085694	0.00066337	0.000583278
GOTERM_BP_DIRECT	GO:0030225~macrophage differentiation	5	2.77778	3.39946e-05	CASP8, PARP1, SIRT1, MMP9, VEGFA	180	18	16792	25.9136	0.0867076	0.000666645	0.000586157
GOTERM_BP_DIRECT	GO:0009409~response to cold	6	3.33333	3.75351e-05	IL6, HSP90AA1, CASP8, THRA, PPARG, HSPD1	180	36	16792	15.5481	0.0952943	0.000725407	0.000637825
GOTERM_BP_DIRECT	GO:0010507~negative regulation of autophagy	6	3.33333	3.75351e-05	LEP, HGF, BCL2, AKT1, MTOR, BCL2L1	180	36	16792	15.5481	0.0952943	0.000725407	0.000637825
GOTERM_BP_DIRECT	GO:0009612~response to mechanical stimulus	7	3.88889	3.80534e-05	MMP14, JUN, RPS6KB1, STAT1, CCL2, PPARG, RETN	180	59	16792	11.0682	0.0965445	0.000730132	0.00064198
GOTERM_BP_DIRECT	GO:0044267~cellular protein metabolic process	9	5	3.84647e-05	APP, MMP13, TTR, MMP1, MMP2, APOA1, CTSG, IAPP, IGF1	180	118	16792	7.11525	0.0975353	0.000730576	0.00064237
GOTERM_BP_DIRECT	GO:0007166~cell surface receptor signaling pathway	13	7.22222	3.86244e-05	EDN1, CD81, MIF, MAPK14, EGFR, AGT, CD4, CASP8, IL2RA, TNFSF10, CCL2, CCR5, BIRC2	180	274	16792	4.42612	0.0979197	0.000730576	0.00064237
GOTERM_BP_DIRECT	GO:1903140~regulation of establishment of endothelial barrier	4	2.22222	4.04001e-05	IKBKB, IL1B, TNF, TNFRSF1A	180	7	16792	53.3079	0.102184	0.000753476	0.000662505
GOTERM_BP_DIRECT	GO:0071455~cellular response to hyperoxia	4	2.22222	4.04001e-05	CAV1, FAS, PPARG, FOXO1	180	7	16792	53.3079	0.102184	0.000753476	0.000662505
GOTERM_BP_DIRECT	GO:0042102~positive regulation of T cell proliferation	7	3.88889	4.19109e-05	IL4, IL6, CD4, IL15, LEP, IL1B, IL6ST	180	60	16792	10.8837	0.105795	0.000776224	0.000682507
GOTERM_BP_DIRECT	GO:0007263~nitric oxide mediated signal transduction	5	2.77778	4.27023e-05	NOS2, NOS3, NOS1, APOE, AGT	180	19	16792	24.5497	0.107682	0.000785428	0.000690599
GOTERM_BP_DIRECT	GO:0035094~response to nicotine	6	3.33333	4.30275e-05	EDN1, CREB1, CASP3, IL13, BCL2, HMOX1	180	37	16792	15.1279	0.108455	0.000785989	0.000691092
GOTERM_MF_DIRECT	GO:0001077~transcriptional activator activity, RNA polymerase II core promoter proximal region sequence-specific binding	12	6.66667	4.45637e-05	EGR1, JUN, CREB1, IRF4, MYC, DDIT3, STAT3, TFAM, PPARA, NR3C1, HIF1A, RELA	180	236	16881	4.76864	0.0238212	0.00127124	0.00112347
GOTERM_BP_DIRECT	GO:0042517~positive regulation of tyrosine phosphorylation of Stat3 protein	6	3.33333	4.91217e-05	IL6, IL15, LEP, STAT3, IL6ST, VEGFA	180	38	16792	14.7298	0.122835	0.000891207	0.000783607
GOTERM_BP_DIRECT	GO:0006801~superoxide metabolic process	5	2.77778	5.29348e-05	NCF1, NOS2, CYBB, CYBA, SOD1	180	20	16792	23.3222	0.131714	0.000953899	0.00083873
GOTERM_BP_DIRECT	GO:0045087~innate immune response	16	8.88889	5.90806e-05	APP, C1S, NCF1, CFI, CYBB, C4BPA, CYBA, HMGB1, MIF, IKBKB, GZMM, TBK1, IRAK1, PPARG, TLR4, TLR2	180	430	16792	3.47121	0.145836	0.0010575	0.000929826
GOTERM_BP_DIRECT	GO:0034599~cellular response to oxidative stress	7	3.88889	6.05933e-05	G6PD, GPX1, PARP1, ATP2A2, FOXO1, HSPA1B, NFE2L2	180	64	16792	10.2035	0.149276	0.00107735	0.000947275
GOTERM_MF_DIRECT	GO:0005179~hormone activity	8	4.44444	6.31239e-05	POMC, EDN1, TTR, LEP, IAPP, IGF1, RETN, AGT	180	94	16881	7.98156	0.0335745	0.00171066	0.00151182
GOTERM_BP_DIRECT	GO:0045348~positive regulation of MHC class II biosynthetic process	4	2.22222	6.41329e-05	IL10, IL4, SIRT1, TLR4	180	8	16792	46.6444	0.157273	0.00111792	0.000982952
GOTERM_BP_DIRECT	GO:0010888~negative regulation of lipid storage	4	2.22222	6.41329e-05	NFKBIA, IL6, LEP, TNF	180	8	16792	46.6444	0.157273	0.00111792	0.000982952
GOTERM_BP_DIRECT	GO:0071550~death-inducing signaling complex assembly	4	2.22222	6.41329e-05	CASP8, RAF1, TNF, TNFRSF1A	180	8	16792	46.6444	0.157273	0.00111792	0.000982952
GOTERM_BP_DIRECT	GO:0042346~positive regulation of NF-kappaB import into nucleus	5	2.77778	6.48474e-05	IL1B, PTGS2, TNF, TLR4, TLR2	180	21	16792	22.2116	0.158878	0.00112304	0.000987449
GOTERM_CC_DIRECT	GO:0043025~neuronal cell body	13	7.22222	6.8352e-05	HSP90AA1, NCF1, CYBB, RPSA, CYBA, MTOR, SOD1, LAMP1, TIMP2, IAPP, APOE, APOB, IL6ST	180	315	18224	4.17834	0.0201635	0.00105639	0.000882687
GOTERM_CC_DIRECT	GO:0005578~proteinaceous extracellular matrix	12	6.66667	7.08986e-05	MMP12, ACAN, MMP13, MMP7, MMP1, MMP2, WNT5A, MMP3, TIMP2, TIMP1, MMP9, VEGFA	180	268	18224	4.53333	0.0209069	0.00105639	0.000882687
GOTERM_BP_DIRECT	GO:0045599~negative regulation of fat cell differentiation	6	3.33333	8.04298e-05	IL6, DDIT3, WNT5A, SIRT1, TNF, FOXO1	180	42	16792	13.327	0.193132	0.00138391	0.00121683
GOTERM_BP_DIRECT	GO:0008285~negative regulation of cell proliferation	15	8.33333	9.09481e-05	IL10, JUN, CXCL8, NOS3, STAT3, CXCL1, PTGS2, IL1A, IL6, IL1B, TIMP2, BAK1, RAF1, TP53, TLR2	180	396	16792	3.53367	0.215462	0.00155486	0.00136714
GOTERM_BP_DIRECT	GO:0035924~cellular response to vascular endothelial growth factor stimulus	5	2.77778	9.43588e-05	FLT1, HSPB1, AKT1, MAPK14, VEGFA	180	23	16792	20.2802	0.22257	0.00159095	0.00139886
GOTERM_BP_DIRECT	GO:0001836~release of cytochrome c from mitochondria	5	2.77778	9.43588e-05	JUN, BCL2, BAX, BAK1, BCL2L1	180	23	16792	20.2802	0.22257	0.00159095	0.00139886
GOTERM_BP_DIRECT	GO:0008635~activation of cysteine-type endopeptidase activity involved in apoptotic process by cytochrome c	4	2.22222	9.54449e-05	CASP7, CASP3, BAX, BAK1	180	9	16792	41.4617	0.224819	0.00159095	0.00139886
GOTERM_BP_DIRECT	GO:0010831~positive regulation of myotube differentiation	4	2.22222	9.54449e-05	MMP14, THRA, MAPK14, MTOR	180	9	16792	41.4617	0.224819	0.00159095	0.00139886
GOTERM_BP_DIRECT	GO:0071300~cellular response to retinoic acid	7	3.88889	0.000100519	ABCA1, LEP, MYC, WNT5A, CCL2, PPARG, AQP1	180	70	16792	9.32889	0.235244	0.00166158	0.00146097
GOTERM_BP_DIRECT	GO:0034644~cellular response to UV	6	3.33333	0.000100928	MYC, BAX, BAK1, PTGS2, TP53, AQP1	180	44	16792	12.7212	0.236079	0.00166158	0.00146097
GOTERM_MF_DIRECT	GO:0042826~histone deacetylase binding	8	4.44444	0.000106078	HSP90AA1, MAPK8, PARP1, SP1, RAC1, HIF1A, RELA, HSPA1B	180	102	16881	7.35556	0.0557756	0.00273783	0.0024196
GOTERM_BP_DIRECT	GO:0006468~protein phosphorylation	16	8.88889	0.00011369	APP, PRKCE, PDGFB, PRKCA, MTOR, IKBKB, MAPK8, CREB1, IRAK1, RPS6KB1, CCL2, AKT1, MAPK1, CTSG, RAF1, MAPK3	180	456	16792	3.27329	0.261654	0.00186019	0.0016356
GOTERM_CC_DIRECT	GO:0072562~blood microparticle	9	5	0.000130508	C1S, PON1, ITGA2B, APOA1, C4BPA, APOE, CFB, AGT, HSPA1B	180	152	18224	5.99474	0.0381472	0.00185197	0.00154745
GOTERM_MF_DIRECT	GO:0043565~sequence-specific DNA binding	17	9.44444	0.000130781	EGR1, JUN, THRA, NR1I2, NR3C1, HIF1A, FOXO1, CREB1, SP1, IRF4, MYC, DDIT3, BCL2, PPARG, PPARA, TP53, NFE2L2	180	518	16881	3.07783	0.0683117	0.00313868	0.00277385
GOTERM_BP_DIRECT	GO:0050715~positive regulation of cytokine secretion	5	2.77778	0.000132573	IL10, IL1A, IRF3, MIF, TNF	180	25	16792	18.6578	0.297934	0.00214286	0.00188414
GOTERM_BP_DIRECT	GO:0034612~response to tumor necrosis factor	5	2.77778	0.000132573	CASP8, RPS6KB1, CASP3, PTGS2, SELE	180	25	16792	18.6578	0.297934	0.00214286	0.00188414
GOTERM_MF_DIRECT	GO:0001223~transcription coactivator binding	4	2.22222	0.000133191	TERT, TFAM, PPARA, FOXO1	180	10	16881	37.5133	0.0695261	0.00313868	0.00277385
GOTERM_BP_DIRECT	GO:0032760~positive regulation of tumor necrosis factor production	6	3.33333	0.000138925	LEP, CCL2, CYBA, HMGB1, TLR4, TLR2	180	47	16792	11.9092	0.309734	0.00220221	0.00193633
GOTERM_BP_DIRECT	GO:0031100~organ regeneration	6	3.33333	0.000138925	GSTP1, HGF, CCL2, APOA1, PPARG, BAK1	180	47	16792	11.9092	0.309734	0.00220221	0.00193633
GOTERM_BP_DIRECT	GO:0071230~cellular response to amino acid stimulus	6	3.33333	0.000138925	SOCS1, COL4A1, MMP2, TNF, EGFR, BCL2L1	180	47	16792	11.9092	0.309734	0.00220221	0.00193633
GOTERM_BP_DIRECT	GO:0048015~phosphatidylinositol-mediated signaling	8	4.44444	0.000139548	PDGFRB, RPS6KB1, EGF, PDGFB, AKT1, IGF1, EGFR, MTOR	180	106	16792	7.04067	0.31088	0.00220221	0.00193633
GOTERM_BP_DIRECT	GO:0007623~circadian rhythm	7	3.88889	0.000147735	JUN, CREB1, NOS2, LEP, SERPINE1, FAS, EGFR	180	75	16792	8.70696	0.325772	0.0023177	0.00203787
GOTERM_MF_DIRECT	GO:0097110~scaffold protein binding	6	3.33333	0.000150034	IKBKB, CASP8, NOS3, VIM, NOS1, MAPK3	180	48	16881	11.7229	0.0779671	0.00338826	0.00299442
GOTERM_BP_DIRECT	GO:0007202~activation of phospholipase C activity	5	2.77778	0.000155379	EDNRA, PRKCE, SELE, EGFR, AGT	180	26	16792	17.9402	0.339384	0.00240928	0.00211839
GOTERM_BP_DIRECT	GO:0032148~activation of protein kinase B activity	5	2.77778	0.000155379	INSR, WNT5A, PDGFB, IGF1, TXN	180	26	16792	17.9402	0.339384	0.00240928	0.00211839
GOTERM_BP_DIRECT	GO:0030324~lung development	7	3.88889	0.000158995	MMP14, NOS3, WNT5A, CYP1A2, HMGB1, EGFR, VEGFA	180	76	16792	8.5924	0.345729	0.0024511	0.00215517
GOTERM_BP_DIRECT	GO:0014070~response to organic cyclic compound	6	3.33333	0.000169757	IL4, MMP14, G6PD, CYP1A1, BAK1, ICAM1	180	49	16792	11.4231	0.364251	0.00260197	0.00228782
GOTERM_MF_DIRECT	GO:0042056~chemoattractant activity	5	2.77778	0.000177285	HGF, PDGFB, HMGB1, MIF, VEGFA	180	27	16881	17.3673	0.091463	0.00384354	0.00339678
GOTERM_BP_DIRECT	GO:0042104~positive regulation of activated T cell proliferation	5	2.77778	0.00018089	IL4, IL2RA, IGF1, HMGB1, IL2	180	27	16792	17.2757	0.38286	0.00272562	0.00239654
GOTERM_BP_DIRECT	GO:0010575~positive regulation of vascular endothelial growth factor production	5	2.77778	0.00018089	IL1A, IL1B, IL6ST, PTGS2, HIF1A	180	27	16792	17.2757	0.38286	0.00272562	0.00239654
GOTERM_BP_DIRECT	GO:0032728~positive regulation of interferon-beta production	5	2.77778	0.00018089	TBK1, IRF3, HMGB1, TLR4, TLR2	180	27	16792	17.2757	0.38286	0.00272562	0.00239654
GOTERM_BP_DIRECT	GO:0014066~regulation of phosphatidylinositol 3-kinase signaling	7	3.88889	0.000183549	PDGFRB, EGF, PDGFB, MAPK1, AKT1, EGFR, MAPK3	180	78	16792	8.37208	0.387223	0.00275014	0.0024181
GOTERM_MF_DIRECT	GO:0004222~metalloendopeptidase activity	8	4.44444	0.00020123	MMP12, MMP14, MMP13, MMP7, MMP1, MMP2, MMP3, MMP9	180	113	16881	6.63953	0.103159	0.00411777	0.00363914
GOTERM_MF_DIRECT	GO:0035035~histone acetyltransferase binding	5	2.77778	0.000205129	EGR1, CREB1, SP1, HIF1A, TP53	180	28	16881	16.747	0.105049	0.00411777	0.00363914
GOTERM_BP_DIRECT	GO:0090200~positive regulation of release of cytochrome c from mitochondria	5	2.77778	0.000209291	TNFSF10, BAX, BAK1, TP53, MMP9	180	28	16792	16.6587	0.427904	0.00311833	0.00274183
GOTERM_MF_DIRECT	GO:0003690~double-stranded DNA binding	7	3.88889	0.000219604	CREB1, STAT1, SP1, MYC, HMGB1, TP53, EGFR	180	81	16881	8.10473	0.112031	0.0042509	0.00375679
GOTERM_BP_DIRECT	GO:0030168~platelet activation	8	4.44444	0.000231555	IL6, PRKCE, MAPK1, AKT1, PRKCA, RAC1, RAF1, MAPK3	180	115	16792	6.48966	0.460903	0.00343087	0.00301665
GOTERM_BP_DIRECT	GO:0046889~positive regulation of lipid biosynthetic process	4	2.22222	0.000244144	CREB1, AKT1, APOE, MTOR	180	12	16792	31.0963	0.478714	0.00350072	0.00307806
GOTERM_BP_DIRECT	GO:0001774~microglial cell activation	4	2.22222	0.000244144	IL4, JUN, IL13, TLR2	180	12	16792	31.0963	0.478714	0.00350072	0.00307806
GOTERM_BP_DIRECT	GO:0036499~PERK-mediated unfolded protein response	4	2.22222	0.000244144	CXCL8, DDIT3, CCL2, NFE2L2	180	12	16792	31.0963	0.478714	0.00350072	0.00307806
GOTERM_BP_DIRECT	GO:0043032~positive regulation of macrophage activation	4	2.22222	0.000244144	IL10, WNT5A, IL13, HSPD1	180	12	16792	31.0963	0.478714	0.00350072	0.00307806
GOTERM_BP_DIRECT	GO:0030195~negative regulation of blood coagulation	4	2.22222	0.000244144	EDN1, PROC, SERPINE1, APOE	180	12	16792	31.0963	0.478714	0.00350072	0.00307806
GOTERM_BP_DIRECT	GO:0045086~positive regulation of interleukin-2 biosynthetic process	4	2.22222	0.000244144	IL1A, CD4, IRF4, IL1B	180	12	16792	31.0963	0.478714	0.00350072	0.00307806
GOTERM_BP_DIRECT	GO:0000122~negative regulation of transcription from RNA polymerase II promoter	20	11.1111	0.000253153	EGR1, EDN1, PARP1, STAT1, CAV1, STAT3, HMGB1, TXN, SIRT1, TNF, FOXO1, RELA, VEGFA, MYC, LEP, DDIT3, PPARG, PPARA, TP53, ELANE	180	720	16792	2.59136	0.491097	0.00361047	0.00317456
GOTERM_BP_DIRECT	GO:0033209~tumor necrosis factor-mediated signaling pathway	8	4.44444	0.000271293	IKBKB, STAT1, LTA, FAS, TNFSF11, TNF, BIRC2, TNFRSF1A	180	118	16792	6.32467	0.515147	0.00384706	0.00338258
GOTERM_BP_DIRECT	GO:1900740~positive regulation of protein insertion into mitochondrial membrane involved in apoptotic signaling pathway	5	2.77778	0.000275511	MAPK8, CASP8, BCL2, GZMB, TP53	180	30	16792	15.5481	0.520573	0.00384706	0.00338258
GOTERM_BP_DIRECT	GO:0010803~regulation of tumor necrosis factor-mediated signaling pathway	5	2.77778	0.000275511	IKBKB, CASP8, TNF, BIRC2, TNFRSF1A	180	30	16792	15.5481	0.520573	0.00384706	0.00338258
GOTERM_BP_DIRECT	GO:0007281~germ cell development	5	2.77778	0.000275511	RPS6KB1, BAX, AKT1, MTOR, BCL2L1	180	30	16792	15.5481	0.520573	0.00384706	0.00338258
GOTERM_BP_DIRECT	GO:0050829~defense response to Gram-negative bacterium	6	3.33333	0.000294134	APP, IL6, CD4, NOS2, SERPINE1, TLR4	180	55	16792	10.177	0.543818	0.0040857	0.00359241
GOTERM_BP_DIRECT	GO:0048147~negative regulation of fibroblast proliferation	5	2.77778	0.000313711	MYC, GSTP1, LTA, BAX, TP53	180	31	16792	15.0466	0.567041	0.00424165	0.00372954
GOTERM_BP_DIRECT	GO:0051926~negative regulation of calcium ion transport	4	2.22222	0.000314903	NOS3, NOS1, PTGS2, ICAM1	180	13	16792	28.7043	0.568416	0.00424165	0.00372954
GOTERM_BP_DIRECT	GO:0006809~nitric oxide biosynthetic process	4	2.22222	0.000314903	NOS2, NOS3, AKT1, NOS1	180	13	16792	28.7043	0.568416	0.00424165	0.00372954
GOTERM_BP_DIRECT	GO:0010745~negative regulation of macrophage derived foam cell differentiation	4	2.22222	0.000314903	ABCA1, NFKBIA, PPARG, PPARA	180	13	16792	28.7043	0.568416	0.00424165	0.00372954
GOTERM_BP_DIRECT	GO:0097296~activation of cysteine-type endopeptidase activity involved in apoptotic signaling pathway	4	2.22222	0.000314903	CASP8, TNFSF10, FAS, BAX	180	13	16792	28.7043	0.568416	0.00424165	0.00372954
GOTERM_BP_DIRECT	GO:2000573~positive regulation of DNA biosynthetic process	4	2.22222	0.000314903	PDGFRB, MYC, HGF, PDGFB	180	13	16792	28.7043	0.568416	0.00424165	0.00372954
GOTERM_BP_DIRECT	GO:0006935~chemotaxis	8	4.44444	0.000332625	IL4, CXCL8, PLAU, MAPK1, CCL2, CXCL1, CCR5, MAPK14	180	122	16792	6.1173	0.588354	0.00445784	0.00391962
GOTERM_MF_DIRECT	GO:0004517~nitric-oxide synthase activity	3	1.66667	0.000333102	NOS2, NOS3, NOS1	180	3	16881	93.7833	0.164929	0.00622556	0.00550192
GOTERM_BP_DIRECT	GO:0031281~positive regulation of cyclase activity	3	1.66667	0.00033663	MAPK8, MAPK14, MAPK3	180	3	16792	93.2889	0.59273	0.00446662	0.00392735
GOTERM_BP_DIRECT	GO:1904044~response to aldosterone	3	1.66667	0.00033663	PARP1, CYBB, CYBA	180	3	16792	93.2889	0.59273	0.00446662	0.00392735
GOTERM_BP_DIRECT	GO:0070301~cellular response to hydrogen peroxide	6	3.33333	0.000348	IL6, SIRT1, RELA, FOXO1, AQP1, NFE2L2	180	57	16792	9.81988	0.604904	0.00459463	0.0040399
GOTERM_BP_DIRECT	GO:0045907~positive regulation of vasoconstriction	5	2.77778	0.000355562	CAV1, AKT1, PTGS2, EGFR, ICAM1	180	32	16792	14.5764	0.612798	0.00467135	0.00410735
GOTERM_MF_DIRECT	GO:0032403~protein complex binding	10	5.55556	0.000357862	NFKBIA, AOC1, CASP8, THRA, MYC, CASP3, ITGAL, PPARA, NR3C1, RELA	180	206	16881	4.55259	0.176044	0.00646538	0.00571387
GOTERM_MF_DIRECT	GO:0004707~MAP kinase activity	4	2.22222	0.000391572	MAPK8, MAPK1, MAPK14, MAPK3	180	14	16881	26.7952	0.19094	0.0068462	0.00605043
GOTERM_BP_DIRECT	GO:0032461~positive regulation of protein oligomerization	4	2.22222	0.00039765	MMP1, MMP3, BAX, TP53	180	14	16792	26.654	0.653939	0.00512038	0.00450218
GOTERM_BP_DIRECT	GO:0045821~positive regulation of glycolytic process	4	2.22222	0.00039765	MYC, INSR, IGF1, HIF1A	180	14	16792	26.654	0.653939	0.00512038	0.00450218
GOTERM_BP_DIRECT	GO:0051402~neuron apoptotic process	5	2.77778	0.00040126	APP, CASP7, BCL2, BAX, BCL2L1	180	33	16792	14.1347	0.657258	0.00512038	0.00450218
GOTERM_BP_DIRECT	GO:0070555~response to interleukin-1	5	2.77778	0.00040126	IRAK1, PRKCA, CYBA, SELE, RELA	180	33	16792	14.1347	0.657258	0.00512038	0.00450218
GOTERM_BP_DIRECT	GO:0071364~cellular response to epidermal growth factor stimulus	5	2.77778	0.00040126	EEF1A1, MYC, GSTP1, AKT1, EGFR	180	33	16792	14.1347	0.657258	0.00512038	0.00450218
GOTERM_BP_DIRECT	GO:2001244~positive regulation of intrinsic apoptotic signaling pathway	5	2.77778	0.00040126	CAV1, BCL2, BAX, TP53, BCL2L1	180	33	16792	14.1347	0.657258	0.00512038	0.00450218
GOTERM_MF_DIRECT	GO:0000978~RNA polymerase II core promoter proximal region sequence-specific DNA binding	13	7.22222	0.000414896	JUN, STAT1, STAT3, NR3C1, RELA, CREB1, IRF3, SP1, IRF4, MYC, DDIT3, TFAM, PPARA	180	355	16881	3.43432	0.201089	0.00702731	0.00621048
GOTERM_BP_DIRECT	GO:0007249~I-kappaB kinase/NF-kappaB signaling	6	3.33333	0.000442387	IKBKB, TBK1, TNF, TLR4, BIRC2, TNFRSF1A	180	60	16792	9.32889	0.69289	0.00561832	0.00493999
GOTERM_CC_DIRECT	GO:0071682~endocytic vesicle lumen	4	2.22222	0.000474936	HSP90AA1, APOA1, APOE, APOB	180	16	18224	25.3111	0.132001	0.00643323	0.00537542
GOTERM_BP_DIRECT	GO:0042981~regulation of apoptotic process	10	5.55556	0.000475323	EGR1, CASP8, STAT1, FAS, BAX, RAF1, TP53, BIRC2, BCL2L1, TNFRSF1A	180	213	16792	4.37976	0.718737	0.006008	0.00528262
GOTERM_MF_DIRECT	GO:0017127~cholesterol transporter activity	4	2.22222	0.000485658	ABCA1, APOA1, APOE, APOB	180	15	16881	25.0089	0.231108	0.00789244	0.00697505
GOTERM_BP_DIRECT	GO:0046688~response to copper ion	4	2.22222	0.000493175	IL1A, SOD3, ICAM1, SOD1	180	15	16792	24.877	0.731825	0.00617511	0.00542956
GOTERM_BP_DIRECT	GO:0032469~endoplasmic reticulum calcium ion homeostasis	4	2.22222	0.000493175	BCL2, BAX, ATP2A2, BAK1	180	15	16792	24.877	0.731825	0.00617511	0.00542956
GOTERM_MF_DIRECT	GO:0050661~NADP binding	5	2.77778	0.000495098	G6PD, NOS2, NOS3, CAT, NOS1	180	35	16881	13.3976	0.235027	0.00789244	0.00697505
GOTERM_BP_DIRECT	GO:0001890~placenta development	5	2.77778	0.00050499	LEP, PPARG, MAPK14, BIRC2, SOD1	180	35	16792	13.327	0.740151	0.00626423	0.00550792
GOTERM_BP_DIRECT	GO:0050918~positive chemotaxis	5	2.77778	0.00050499	HGF, PDGFB, HMGB1, MIF, VEGFA	180	35	16792	13.327	0.740151	0.00626423	0.00550792
GOTERM_MF_DIRECT	GO:0019903~protein phosphatase binding	6	3.33333	0.000541837	HSP90AA1, STAT3, PPARG, MAPK14, TP53, EGFR	180	63	16881	8.93175	0.254137	0.00839074	0.00741543
GOTERM_BP_DIRECT	GO:0009611~response to wounding	6	3.33333	0.000554889	RPS6KB1, MYC, PDGFB, CYP1A1, CCL2, RAC1	180	63	16792	8.88466	0.772557	0.00685133	0.00602414
GOTERM_BP_DIRECT	GO:0042632~cholesterol homeostasis	6	3.33333	0.000596778	ABCA1, CAV1, APOA1, APOE, APOB, SIRT1	180	64	16792	8.74583	0.79662	0.00733414	0.00644865
GOTERM_BP_DIRECT	GO:0030949~positive regulation of vascular endothelial growth factor receptor signaling pathway	4	2.22222	0.000602241	FLT1, IL1B, HIF1A, VEGFA	180	16	16792	23.3222	0.799564	0.00733414	0.00644865
GOTERM_BP_DIRECT	GO:0097194~execution phase of apoptosis	4	2.22222	0.000602241	CASP7, CASP8, CASP3, AKT1	180	16	16792	23.3222	0.799564	0.00733414	0.00644865
GOTERM_BP_DIRECT	GO:0055114~oxidation-reduction process	17	9.44444	0.000611143	AOC3, G6PD, AOC1, NOS2, NCF1, NOS3, TYRP1, CYBB, CYBA, TXN, PTGS2, SDHA, SOD3, SOD1, CYP1A2, CYP1A1, NOS1	180	592	16792	2.6789	0.804272	0.00740872	0.00651423
GOTERM_MF_DIRECT	GO:0008270~zinc ion binding	26	14.4444	0.000614857	THRA, NR1I2, XIAP, NR3C1, SMPD1, PDLIM5, EGR1, AOC1, MMP7, PARP1, MMP1, MMP2, MMP3, PRKCA, MMP9, SOD3, SIRT3, SOD1, MMP12, CD4, MMP14, MMP13, PPARG, PPARA, TP53, BIRC2	180	1169	16881	2.08586	0.283043	0.00916969	0.00810384
GOTERM_MF_DIRECT	GO:0001948~glycoprotein binding	6	3.33333	0.000625975	CD4, HSP90AA1, ITGAM, PLAT, VIM, EGFR	180	65	16881	8.65692	0.287345	0.00916969	0.00810384
GOTERM_MF_DIRECT	GO:0051434~BH3 domain binding	3	1.66667	0.00066155	BCL2, BAX, BCL2L1	180	4	16881	70.3375	0.300939	0.00919385	0.00812519
GOTERM_MF_DIRECT	GO:0034617~tetrahydrobiopterin binding	3	1.66667	0.00066155	NOS2, NOS3, NOS1	180	4	16881	70.3375	0.300939	0.00919385	0.00812519
GOTERM_BP_DIRECT	GO:0051450~myoblast proliferation	3	1.66667	0.000668532	GPX1, HGF, IGF1	180	4	16792	69.9667	0.832075	0.00803141	0.00706174
GOTERM_BP_DIRECT	GO:1900015~regulation of cytokine production involved in inflammatory response	3	1.66667	0.000668532	NOS2, LEP, MAPK14	180	4	16792	69.9667	0.832075	0.00803141	0.00706174
GOTERM_CC_DIRECT	GO:0005741~mitochondrial outer membrane	8	4.44444	0.000682784	CASP8, RPS6KB1, BCL2, BAX, BAK1, RAF1, MTOR, BCL2L1	180	149	18224	5.43594	0.184162	0.00884651	0.00739188
GOTERM_BP_DIRECT	GO:2001237~negative regulation of extrinsic apoptotic signaling pathway	5	2.77778	0.000694427	IL4, RPS6KB1, GSTP1, IGF1, RELA	180	38	16792	12.2749	0.843293	0.00819486	0.00720545
GOTERM_BP_DIRECT	GO:0042157~lipoprotein metabolic process	5	2.77778	0.000694427	ABCA1, APOA1, APOE, APOB, PPARA	180	38	16792	12.2749	0.843293	0.00819486	0.00720545
GOTERM_BP_DIRECT	GO:0008625~extrinsic apoptotic signaling pathway via death domain receptors	5	2.77778	0.000694427	BCL2, FAS, BAX, TNF, TNFRSF1A	180	38	16792	12.2749	0.843293	0.00819486	0.00720545
GOTERM_BP_DIRECT	GO:0018107~peptidyl-threonine phosphorylation	5	2.77778	0.000694427	MAPK8, BCL2, MAPK1, AKT1, MTOR	180	38	16792	12.2749	0.843293	0.00819486	0.00720545
GOTERM_BP_DIRECT	GO:0010468~regulation of gene expression	7	3.88889	0.000702477	IL10, MYC, CYP1A2, BCL2, IGF1, APOE, HIF1A	180	100	16792	6.53022	0.846625	0.00825333	0.00725687
GOTERM_BP_DIRECT	GO:0071276~cellular response to cadmium ion	4	2.22222	0.000725579	CYP1A2, CYBB, HMOX1, SOD1	180	17	16792	21.9503	0.855799	0.00848737	0.00746265
GOTERM_BP_DIRECT	GO:0006006~glucose metabolic process	6	3.33333	0.00073674	G6PD, LEP, MYC, AKT1, MAPK14, TNF	180	67	16792	8.35423	0.860033	0.00858029	0.00754435
GOTERM_BP_DIRECT	GO:0043280~positive regulation of cysteine-type endopeptidase activity involved in apoptotic process	5	2.77778	0.000845641	MYC, TNFSF10, HMGB1, SIRT1, TNF	180	40	16792	11.6611	0.895349	0.00980576	0.00862186
GOTERM_BP_DIRECT	GO:0060324~face development	4	2.22222	0.000863896	WNT5A, MAPK1, RAF1, MAPK3	180	18	16792	20.7309	0.900328	0.0098462	0.00865742
GOTERM_BP_DIRECT	GO:0036120~cellular response to platelet-derived growth factor stimulus	4	2.22222	0.000863896	PDGFRB, CREB1, MYC, CCL2	180	18	16792	20.7309	0.900328	0.0098462	0.00865742
GOTERM_BP_DIRECT	GO:0001935~endothelial cell proliferation	4	2.22222	0.000863896	MMP14, HMOX1, APOA1, HMGB1	180	18	16792	20.7309	0.900328	0.0098462	0.00865742
GOTERM_BP_DIRECT	GO:0034142~toll-like receptor 4 signaling pathway	4	2.22222	0.000863896	NFKBIA, ITGAM, IRAK1, TLR4	180	18	16792	20.7309	0.900328	0.0098462	0.00865742
GOTERM_MF_DIRECT	GO:0001618~virus receptor activity	6	3.33333	0.000878994	CD4, LAMP1, RPSA, CCR5, HSPA1B, ICAM1	180	70	16881	8.03857	0.378578	0.0119104	0.010526
GOTERM_BP_DIRECT	GO:0098869~cellular oxidant detoxification	6	3.33333	0.000899885	GPX1, GSTP1, CAT, APOE, TXN, PTGS2	180	70	16792	7.99619	0.909461	0.0102127	0.0089797
GOTERM_MF_DIRECT	GO:0031072~heat shock protein binding	5	2.77778	0.000999041	NFKBIA, IRAK1, TFAM, BAK1, HSPA1B	180	42	16881	11.1647	0.417689	0.0132068	0.0116717
GOTERM_BP_DIRECT	GO:0008637~apoptotic mitochondrial changes	4	2.22222	0.00101787	BAX, AKT1, HSPD1, BCL2L1	180	19	16792	19.6398	0.933931	0.0114154	0.0100371
GOTERM_BP_DIRECT	GO:0042832~defense response to protozoan	4	2.22222	0.00101787	IL10, IL4, IL6, IRF4	180	19	16792	19.6398	0.933931	0.0114154	0.0100371
GOTERM_BP_DIRECT	GO:0002548~monocyte chemotaxis	5	2.77778	0.00101869	IL6, FLT1, PDGFB, TNFSF11, CCL2	180	42	16792	11.1058	0.934077	0.0114154	0.0100371
GOTERM_MF_DIRECT	GO:0016301~kinase activity	10	5.55556	0.0011008	MAPK8, RPS6KB1, IRAK1, PLAU, MAPK1, AKT1, PRKCA, RAF1, MTOR, MAPK3	180	241	16881	3.89142	0.448913	0.0142056	0.0125544
GOTERM_BP_DIRECT	GO:0072584~caveolin-mediated endocytosis	3	1.66667	0.0011064	CAV1, MAPK1, MAPK3	180	5	16792	55.9733	0.947844	0.0121755	0.0107055
GOTERM_BP_DIRECT	GO:0090335~regulation of brown fat cell differentiation	3	1.66667	0.0011064	LEP, SIRT1, MTOR	180	5	16792	55.9733	0.947844	0.0121755	0.0107055
GOTERM_BP_DIRECT	GO:0031622~positive regulation of fever generation	3	1.66667	0.0011064	IL1B, PTGS2, TNF	180	5	16792	55.9733	0.947844	0.0121755	0.0107055
GOTERM_BP_DIRECT	GO:0032489~regulation of Cdc42 protein signal transduction	3	1.66667	0.0011064	ABCA1, APOA1, APOE	180	5	16792	55.9733	0.947844	0.0121755	0.0107055
GOTERM_BP_DIRECT	GO:0043525~positive regulation of neuron apoptotic process	5	2.77778	0.00111392	JUN, DDIT3, CASP3, BAX, TP53	180	43	16792	10.8475	0.948881	0.0121755	0.0107055
GOTERM_BP_DIRECT	GO:0048538~thymus development	5	2.77778	0.00111392	BCL2, MAPK1, RAF1, SOD1, MAPK3	180	43	16792	10.8475	0.948881	0.0121755	0.0107055
GOTERM_BP_DIRECT	GO:0009615~response to virus	7	3.88889	0.00115656	IKBKB, TBK1, ODC1, CYP1A1, HSPB1, APOB, TNF	180	110	16792	5.93657	0.954384	0.01259	0.01107
GOTERM_BP_DIRECT	GO:1900034~regulation of cellular response to heat	6	3.33333	0.00122957	HSP90AA1, MAPK1, SIRT1, HSPA1B, MTOR, MAPK3	180	75	16792	7.46311	0.962466	0.0133303	0.0117209
GOTERM_CC_DIRECT	GO:0034364~high-density lipoprotein particle	4	2.22222	0.0012507	ABCA1, PON1, APOA1, APOE	180	22	18224	18.4081	0.311296	0.0155296	0.0129761
GOTERM_MF_DIRECT	GO:0008144~drug binding	6	3.33333	0.00127501	AOC1, GSTP1, IL2RA, NR1I2, PPARG, PPARA	180	76	16881	7.40395	0.498534	0.016071	0.014203
GOTERM_MF_DIRECT	GO:0003700~transcription factor activity, sequence-specific DNA binding	22	12.2222	0.00131816	EGR1, JUN, THRA, STAT1, WNT5A, STAT3, NR1I2, HMGB1, NR3C1, HIF1A, RELA, CREB1, IRF3, SP1, IRF4, MYC, DDIT3, TFAM, PPARG, PPARA, TP53, NFE2L2	180	961	16881	2.14696	0.510121	0.0162374	0.01435
GOTERM_BP_DIRECT	GO:0071363~cellular response to growth factor stimulus	5	2.77778	0.0013228	RPS6KB1, INSR, CAT, PDGFB, NOS1	180	45	16792	10.3654	0.970741	0.014283	0.0125585
GOTERM_BP_DIRECT	GO:0006921~cellular component disassembly involved in execution phase of apoptosis	4	2.22222	0.00137537	CASP7, CASP8, CASP3, BIRC2	180	21	16792	17.7693	0.974575	0.0146724	0.012901
GOTERM_BP_DIRECT	GO:2000378~negative regulation of reactive oxygen species metabolic process	4	2.22222	0.00137537	G6PD, BCL2, HIF1A, SIRT3	180	21	16792	17.7693	0.974575	0.0146724	0.012901
GOTERM_BP_DIRECT	GO:0019835~cytolysis	4	2.22222	0.00137537	GZMM, GZMA, GZMB, BAK1	180	21	16792	17.7693	0.974575	0.0146724	0.012901
GOTERM_CC_DIRECT	GO:0005654~nucleoplasm	44	24.4444	0.00137679	THRA, NR1I2, XIAP, HMGB1, TXN, NR3C1, HIF1A, FOXO1, RELA, PTPA, CASP7, MAPK8, CASP8, TERT, MYC, CASP3, AKT1, MAPK1, DECR1, MAPK3, EGR1, JUN, HSP90AA1, PARP1, IL15, STAT1, STAT3, PRKCA, RPSA, MIF, MAPK14, SIRT1, MTOR, SOD1, CREB1, IRF3, RPS6KB1, SP1, IRF4, DDIT3, PPARG, PPARA, TP53, HSPA1B	180	2784	18224	1.60013	0.336726	0.0164114	0.0137129
GOTERM_CC_DIRECT	GO:0005887~integral component of plasma membrane	27	15	0.001434	APP, FLT1, CD81, ITGA2B, ATP2A2, SLC2A4, TNF, AQP1, ICAM1, EDNRA, LAMP1, GJA4, TNFSF10, TNFSF11, CCR5, ABCA1, ABCC1, IL15, CAV1, INSR, CYBB, TNFRSF1A, MMP14, SELL, FAS, TLR4, TLR2	180	1415	18224	1.93187	0.347952	0.0164358	0.0137333
GOTERM_BP_DIRECT	GO:0010595~positive regulation of endothelial cell migration	5	2.77778	0.00143685	EDN1, WNT5A, PRKCA, AGT, VEGFA	180	46	16792	10.1401	0.978426	0.0152672	0.013424
GOTERM_MF_DIRECT	GO:0001530~lipopolysaccharide binding	4	2.22222	0.00155649	HMGB1, TLR4, HSPD1, TLR2	180	22	16881	17.0515	0.56946	0.018747	0.0165679
GOTERM_BP_DIRECT	GO:0051781~positive regulation of cell division	5	2.77778	0.00155759	IL1A, IL1B, CAT, PDGFB, VEGFA	180	47	16792	9.92435	0.984375	0.0164845	0.0144942
GOTERM_CC_DIRECT	GO:0005791~rough endoplasmic reticulum	5	2.77778	0.00156923	APP, NCF1, CYBB, CCL2, HSPD1	180	51	18224	9.92593	0.373745	0.0173196	0.0144718
GOTERM_BP_DIRECT	GO:0051000~positive regulation of nitric-oxide synthase activity	4	2.22222	0.00158012	TERT, AKT1, APOE, HIF1A	180	22	16792	16.9616	0.985288	0.0165913	0.0145881
GOTERM_BP_DIRECT	GO:0060999~positive regulation of dendritic spine development	4	2.22222	0.00158012	RAC1, APOE, IL2, MTOR	180	22	16792	16.9616	0.985288	0.0165913	0.0145881
GOTERM_MF_DIRECT	GO:0004672~protein kinase activity	12	6.66667	0.00159338	IKBKB, TBK1, RPS6KB1, IRAK1, PRKCE, CCL2, AKT1, PRKCA, RAF1, MAPK14, EGFR, MTOR	180	359	16881	3.13482	0.577982	0.0187742	0.016592
GOTERM_BP_DIRECT	GO:0032873~negative regulation of stress-activated MAPK cascade	3	1.66667	0.00164797	MYC, GSTP1, FOXO1	180	6	16792	46.6444	0.987728	0.0168396	0.0148065
GOTERM_BP_DIRECT	GO:0060137~maternal process involved in parturition	3	1.66667	0.00164797	EDN1, CYP1A1, CCL2	180	6	16792	46.6444	0.987728	0.0168396	0.0148065
GOTERM_BP_DIRECT	GO:0006924~activation-induced cell death of T cells	3	1.66667	0.00164797	IL2RA, FAS, AKT1	180	6	16792	46.6444	0.987728	0.0168396	0.0148065
GOTERM_BP_DIRECT	GO:0010887~negative regulation of cholesterol storage	3	1.66667	0.00164797	ABCA1, PPARG, PPARA	180	6	16792	46.6444	0.987728	0.0168396	0.0148065
GOTERM_BP_DIRECT	GO:0033210~leptin-mediated signaling pathway	3	1.66667	0.00164797	LEP, STAT3, SIRT1	180	6	16792	46.6444	0.987728	0.0168396	0.0148065
GOTERM_BP_DIRECT	GO:0051045~negative regulation of membrane protein ectodomain proteolysis	3	1.66667	0.00164797	IL10, TIMP2, TIMP1	180	6	16792	46.6444	0.987728	0.0168396	0.0148065
GOTERM_BP_DIRECT	GO:0002740~negative regulation of cytokine secretion involved in immune response	3	1.66667	0.00164797	IL10, APOA1, TNF	180	6	16792	46.6444	0.987728	0.0168396	0.0148065
GOTERM_MF_DIRECT	GO:0051087~chaperone binding	6	3.33333	0.00169471	BAX, BAK1, TP53, BIRC2, HSPD1, SOD1	180	81	16881	6.94691	0.600531	0.0195433	0.0172717
GOTERM_CC_DIRECT	GO:0005768~endosome	9	5	0.00173286	APP, FLT1, IL15, SMPD1, CAV1, CYBA, HMGB1, CCR5, EGFR	180	225	18224	4.04978	0.403598	0.0184426	0.0154101
GOTERM_BP_DIRECT	GO:0033137~negative regulation of peptidyl-serine phosphorylation	4	2.22222	0.00180299	CAV1, HGF, BAX, BAK1	180	23	16792	16.2242	0.99189	0.0183533	0.0161374
GOTERM_CC_DIRECT	GO:0005769~early endosome	9	5	0.00194685	AOC3, CD4, MAPK1, APOA1, HMGB1, APOE, APOB, HSPD1, MAPK3	180	229	18224	3.97904	0.440508	0.0193748	0.016189
GOTERM_CC_DIRECT	GO:0031264~death-inducing signaling complex	3	1.66667	0.00195049	CASP8, CASP3, FAS	180	7	18224	43.3905	0.441116	0.0193748	0.016189
GOTERM_BP_DIRECT	GO:0030307~positive regulation of cell growth	6	3.33333	0.00203672	MMP14, BCL2, AKT1, CYBA, EGFR, IL2	180	84	16792	6.66349	0.995658	0.0206537	0.0181601
GOTERM_BP_DIRECT	GO:0019722~calcium-mediated signaling	5	2.77778	0.00211138	EDN1, CXCL8, TNFSF11, CCR5, SELE	180	51	16792	9.14597	0.996444	0.0213298	0.0187545
GOTERM_CC_DIRECT	GO:0005794~Golgi apparatus	19	10.5556	0.00213289	ABCA1, AOC3, APP, NCF1, IL15, PRKCE, CYBB, CYBA, FUT4, HSPD1, PROC, CAT, MAPK1, PPARG, APOE, RAF1, APOB, TLR2, MAPK3	180	863	18224	2.22902	0.470743	0.0205033	0.017132
GOTERM_BP_DIRECT	GO:0050830~defense response to Gram-positive bacterium	6	3.33333	0.00214564	APP, IL6, TBK1, LTA, TNF, TLR2	180	85	16792	6.5851	0.996755	0.0215941	0.0189869
GOTERM_MF_DIRECT	GO:0034618~arginine binding	3	1.66667	0.00226732	NOS2, NOS3, NOS1	180	7	16881	40.1929	0.707126	0.0253064	0.0223648
GOTERM_BP_DIRECT	GO:0019233~sensory perception of pain	5	2.77778	0.00226854	EDN1, MAPK1, IAPP, PTGS2, MAPK3	180	52	16792	8.97009	0.997664	0.0225204	0.0198014
GOTERM_MF_DIRECT	GO:0004674~protein serine/threonine kinase activity	12	6.66667	0.00228784	IKBKB, MAPK8, TBK1, IRAK1, PRKCE, MAPK1, AKT1, PRKCA, RAF1, MAPK14, MTOR, MAPK3	180	376	16881	2.99309	0.710367	0.0253064	0.0223648
GOTERM_BP_DIRECT	GO:0061051~positive regulation of cell growth involved in cardiac muscle cell development	3	1.66667	0.002291	EDN1, IGF1, MTOR	180	7	16792	39.981	0.9978	0.0225204	0.0198014
GOTERM_BP_DIRECT	GO:0001542~ovulation from ovarian follicle	3	1.66667	0.002291	NOS3, LEP, SIRT1	180	7	16792	39.981	0.9978	0.0225204	0.0198014
GOTERM_BP_DIRECT	GO:0044321~response to leptin	3	1.66667	0.002291	EDN1, STAT3, SIRT1	180	7	16792	39.981	0.9978	0.0225204	0.0198014
GOTERM_BP_DIRECT	GO:0043496~regulation of protein homodimerization activity	3	1.66667	0.002291	BCL2, BAX, BAK1	180	7	16792	39.981	0.9978	0.0225204	0.0198014
GOTERM_BP_DIRECT	GO:0032735~positive regulation of interleukin-12 production	4	2.22222	0.00230524	HMGB1, TLR4, HSPD1, TLR2	180	25	16792	14.9262	0.997882	0.0225204	0.0198014
GOTERM_BP_DIRECT	GO:0033344~cholesterol efflux	4	2.22222	0.00230524	ABCA1, APOA1, APOE, APOB	180	25	16792	14.9262	0.997882	0.0225204	0.0198014
GOTERM_BP_DIRECT	GO:0030878~thyroid gland development	4	2.22222	0.00230524	THRA, MAPK1, RAF1, MAPK3	180	25	16792	14.9262	0.997882	0.0225204	0.0198014
GOTERM_CC_DIRECT	GO:0010008~endosome membrane	8	4.44444	0.00238388	TBK1, IRAK1, LAMP1, INSR, TYRP1, APOB, TLR4, EGFR	180	185	18224	4.37814	0.508967	0.0221999	0.0185495
GOTERM_BP_DIRECT	GO:0045727~positive regulation of translation	5	2.77778	0.00243358	IL6, RPS6KB1, MAPK1, MTOR, MAPK3	180	53	16792	8.80084	0.998498	0.0236874	0.0208275
GOTERM_MF_DIRECT	GO:0004175~endopeptidase activity	5	2.77778	0.00255772	MMP12, MMP1, MMP3, MMP9, ELANE	180	54	16881	8.68364	0.749802	0.0277257	0.024503
GOTERM_BP_DIRECT	GO:0031018~endocrine pancreas development	4	2.22222	0.00258565	IL6, AKT1, BAK1, FOXO1	180	26	16792	14.3521	0.999	0.0248951	0.0218894
GOTERM_BP_DIRECT	GO:0002053~positive regulation of mesenchymal cell proliferation	4	2.22222	0.00258565	STAT1, MYC, WNT5A, VEGFA	180	26	16792	14.3521	0.999	0.0248951	0.0218894
GOTERM_BP_DIRECT	GO:0040014~regulation of multicellular organism growth	4	2.22222	0.00258565	APP, STAT3, IGF1, SOD1	180	26	16792	14.3521	0.999	0.0248951	0.0218894
GOTERM_BP_DIRECT	GO:0007565~female pregnancy	6	3.33333	0.00262417	IL4, SP1, LEP, UCP2, BCL2, AGT	180	89	16792	6.28914	0.999098	0.025175	0.0221355
GOTERM_MF_DIRECT	GO:0008233~peptidase activity	6	3.33333	0.0026934	APP, CASP8, CASP3, CTSG, MASP2, ELANE	180	90	16881	6.25222	0.767554	0.028624	0.0252969
GOTERM_CC_DIRECT	GO:0005634~nucleus	72	40	0.00270197	THRA, HSPB1, HMGB1, NR3C1, AQP1, IKBKB, CASP7, MYC, CASP3, AKT1, CTSG, RAC1, PDGFRB, G6PD, HSP90AA1, PARP1, PRKCE, MMP2, APOA1, RPSA, CYBA, SIRT1, EEF1A1, CREB1, IRF3, IRF4, DDIT3, TFAM, PPARG, RAF1, PPARA, TP53, BIRC2, GSTP1, NR1I2, XIAP, RETN, TXN, PTGS2, HIF1A, FOXO1, EGFR, RELA, PTPA, MAPK8, SOCS1, IRAK1, TERT, HMOX1, MAPK1, APOE, DECR1, MAPK3, EGR1, JUN, NOS2, NOS3, STAT1, GZMA, STAT3, GZMB,…	180	5415	18224	1.34619	0.553482	0.0243996	0.0203876
GOTERM_MF_DIRECT	GO:0003707~steroid hormone receptor activity	5	2.77778	0.00292221	THRA, NR1I2, PPARG, PPARA, NR3C1	180	56	16881	8.37351	0.794689	0.0304585	0.0269181
GOTERM_CC_DIRECT	GO:0005788~endoplasmic reticulum lumen	8	4.44444	0.00292738	CD4, PROC, COL4A1, WNT5A, PDGFB, APOA1, APOB, PTGS2	180	192	18224	4.21852	0.58257	0.0256576	0.0214388
GOTERM_MF_DIRECT	GO:0030235~nitric-oxide synthase regulator activity	3	1.66667	0.00300205	HSP90AA1, AKT1, EGFR	180	8	16881	35.1687	0.803394	0.0307002	0.0271317
GOTERM_BP_DIRECT	GO:0038095~Fc-epsilon receptor signaling pathway	8	4.44444	0.00301509	NFKBIA, IKBKB, JUN, MAPK8, MAPK1, RAC1, RELA, MAPK3	180	178	16792	4.19276	0.999683	0.0277047	0.0243598
GOTERM_BP_DIRECT	GO:0007179~transforming growth factor beta receptor signaling pathway	6	3.33333	0.00303065	JUN, CREB1, PARP1, PDGFB, CCL2, APOA1	180	92	16792	6.08406	0.999696	0.0277047	0.0243598
GOTERM_BP_DIRECT	GO:0002262~myeloid cell homeostasis	3	1.66667	0.00303328	BAX, BAK1, SOD1	180	8	16792	34.9833	0.999698	0.0277047	0.0243598
GOTERM_BP_DIRECT	GO:0006527~arginine catabolic process	3	1.66667	0.00303328	NOS2, NOS3, NOS1	180	8	16792	34.9833	0.999698	0.0277047	0.0243598
GOTERM_BP_DIRECT	GO:0001955~blood vessel maturation	3	1.66667	0.00303328	DDIT3, MMP2, RECK	180	8	16792	34.9833	0.999698	0.0277047	0.0243598
GOTERM_BP_DIRECT	GO:0002674~negative regulation of acute inflammatory response	3	1.66667	0.00303328	IL4, GSTP1, PPARG	180	8	16792	34.9833	0.999698	0.0277047	0.0243598
GOTERM_BP_DIRECT	GO:0032872~regulation of stress-activated MAPK cascade	3	1.66667	0.00303328	GSTP1, MAPK1, MAPK3	180	8	16792	34.9833	0.999698	0.0277047	0.0243598
GOTERM_BP_DIRECT	GO:0009308~amine metabolic process	3	1.66667	0.00303328	AOC3, AOC1, CYP1A1	180	8	16792	34.9833	0.999698	0.0277047	0.0243598
GOTERM_BP_DIRECT	GO:0043497~regulation of protein heterodimerization activity	3	1.66667	0.00303328	BCL2, BAX, BAK1	180	8	16792	34.9833	0.999698	0.0277047	0.0243598
GOTERM_BP_DIRECT	GO:0034380~high-density lipoprotein particle assembly	3	1.66667	0.00303328	ABCA1, APOA1, APOE	180	8	16792	34.9833	0.999698	0.0277047	0.0243598
GOTERM_BP_DIRECT	GO:1904706~negative regulation of vascular smooth muscle cell proliferation	3	1.66667	0.00303328	IL10, GSTP1, HMOX1	180	8	16792	34.9833	0.999698	0.0277047	0.0243598
GOTERM_BP_DIRECT	GO:0010544~negative regulation of platelet activation	3	1.66667	0.00303328	NOS3, PDGFB, APOE	180	8	16792	34.9833	0.999698	0.0277047	0.0243598
GOTERM_BP_DIRECT	GO:0035234~ectopic germ cell programmed cell death	3	1.66667	0.00303328	IL1A, IL1B, BAX	180	8	16792	34.9833	0.999698	0.0277047	0.0243598
GOTERM_BP_DIRECT	GO:0045416~positive regulation of interleukin-8 biosynthetic process	3	1.66667	0.00303328	TNF, TLR4, ELANE	180	8	16792	34.9833	0.999698	0.0277047	0.0243598
GOTERM_BP_DIRECT	GO:0006959~humoral immune response	5	2.77778	0.00317639	IL6, LTA, BCL2, CCL2, TNF	180	57	16792	8.18324	0.999794	0.0285145	0.0250718
GOTERM_BP_DIRECT	GO:0071346~cellular response to interferon-gamma	5	2.77778	0.00317639	EDN1, NOS2, MYC, WNT5A, CCL2	180	57	16792	8.18324	0.999794	0.0285145	0.0250718
GOTERM_BP_DIRECT	GO:0032091~negative regulation of protein binding	5	2.77778	0.00317639	MAPK8, CAV1, PDGFB, BAX, PPARA	180	57	16792	8.18324	0.999794	0.0285145	0.0250718
GOTERM_BP_DIRECT	GO:0043392~negative regulation of DNA binding	4	2.22222	0.00320748	NFKBIA, JUN, GZMA, HMOX1	180	28	16792	13.327	0.999811	0.0285145	0.0250718
GOTERM_BP_DIRECT	GO:0001569~patterning of blood vessels	4	2.22222	0.00320748	EDN1, EDNRA, COL4A1, VEGFA	180	28	16792	13.327	0.999811	0.0285145	0.0250718
GOTERM_BP_DIRECT	GO:0010033~response to organic substance	4	2.22222	0.00320748	CREB1, WNT5A, RELA, SOD1	180	28	16792	13.327	0.999811	0.0285145	0.0250718
GOTERM_BP_DIRECT	GO:2000145~regulation of cell motility	4	2.22222	0.00320748	EGF, CD81, RAF1, EGFR	180	28	16792	13.327	0.999811	0.0285145	0.0250718
GOTERM_BP_DIRECT	GO:0032715~negative regulation of interleukin-6 production	4	2.22222	0.00320748	IL10, HGF, TNF, TLR4	180	28	16792	13.327	0.999811	0.0285145	0.0250718
GOTERM_CC_DIRECT	GO:0046930~pore complex	3	1.66667	0.00330071	BCL2, BAX, BAK1	180	9	18224	33.7481	0.62665	0.0281032	0.0234822
GOTERM_BP_DIRECT	GO:0008584~male gonad development	6	3.33333	0.00332571	MMP14, INSR, WNT5A, BCL2, TNFSF10, BCL2L1	180	94	16792	5.95461	0.999862	0.0294673	0.0259096
GOTERM_BP_DIRECT	GO:0050821~protein stabilization	7	3.88889	0.0033834	HSP90AA1, CREB1, LAMP1, APOA1, IGF1, HSPA1B, HSPD1	180	136	16792	4.80163	0.999882	0.0298792	0.0262718
GOTERM_BP_DIRECT	GO:0006366~transcription from RNA polymerase II promoter	14	7.77778	0.00344957	EGR1, JUN, PARP1, THRA, NR3C1, HIF1A, RELA, CREB1, IRF3, IRF4, MYC, TFAM, TP53, NFE2L2	180	513	16792	2.5459	0.999901	0.0303631	0.0266972
GOTERM_BP_DIRECT	GO:0007507~heart development	8	4.44444	0.0035216	ACAN, EDN1, EDNRA, CASP7, PDGFB, PPARG, RAF1, PPARA	180	183	16792	4.0782	0.999918	0.0308951	0.027165
GOTERM_BP_DIRECT	GO:0046627~negative regulation of insulin receptor signaling pathway	4	2.22222	0.00354979	SOCS1, RPS6KB1, IL1B, RELA	180	29	16792	12.8674	0.999924	0.0310403	0.0272927
GOTERM_MF_DIRECT	GO:0031625~ubiquitin protein ligase binding	10	5.55556	0.00358294	NFKBIA, CASP8, BCL2, HIF1A, TP53, RELA, FOXO1, EGFR, HSPA1B, HSPD1	180	287	16881	3.26771	0.856562	0.0359621	0.031782
GOTERM_BP_DIRECT	GO:0051216~cartilage development	5	2.77778	0.00360005	EDN1, WNT5A, TIMP1, HIF1A, MAPK3	180	59	16792	7.90584	0.999934	0.0313769	0.0275886
GOTERM_BP_DIRECT	GO:0050679~positive regulation of epithelial cell proliferation	5	2.77778	0.00382559	IL6, MYC, IGF1, EGFR, VEGFA	180	60	16792	7.77407	0.999964	0.0323774	0.0284683
GOTERM_BP_DIRECT	GO:0002237~response to molecule of bacterial origin	3	1.66667	0.00387267	IL10, CXCL8, TLR2	180	9	16792	31.0963	0.999968	0.0323774	0.0284683
GOTERM_BP_DIRECT	GO:0003014~renal system process	3	1.66667	0.00387267	BCL2, FAS, AGT	180	9	16792	31.0963	0.999968	0.0323774	0.0284683
GOTERM_BP_DIRECT	GO:0050778~positive regulation of immune response	3	1.66667	0.00387267	IL15, CTSG, ELANE	180	9	16792	31.0963	0.999968	0.0323774	0.0284683
GOTERM_BP_DIRECT	GO:1904754~positive regulation of vascular associated smooth muscle cell migration	3	1.66667	0.00387267	TERT, PDGFB, AGT	180	9	16792	31.0963	0.999968	0.0323774	0.0284683
GOTERM_BP_DIRECT	GO:0042158~lipoprotein biosynthetic process	3	1.66667	0.00387267	APOA1, APOE, APOB	180	9	16792	31.0963	0.999968	0.0323774	0.0284683
GOTERM_BP_DIRECT	GO:0034405~response to fluid shear stress	3	1.66667	0.00387267	PDGFRB, NOS3, AKT1	180	9	16792	31.0963	0.999968	0.0323774	0.0284683
GOTERM_BP_DIRECT	GO:0060020~Bergmann glial cell differentiation	3	1.66667	0.00387267	MAPK1, VIM, MAPK3	180	9	16792	31.0963	0.999968	0.0323774	0.0284683
GOTERM_BP_DIRECT	GO:0070102~interleukin-6-mediated signaling pathway	3	1.66667	0.00387267	IL6, STAT3, IL6ST	180	9	16792	31.0963	0.999968	0.0323774	0.0284683
GOTERM_BP_DIRECT	GO:0009651~response to salt stress	3	1.66667	0.00387267	HSP90AA1, BAX, TNF	180	9	16792	31.0963	0.999968	0.0323774	0.0284683
GOTERM_BP_DIRECT	GO:0060068~vagina development	3	1.66667	0.00387267	WNT5A, BAX, BAK1	180	9	16792	31.0963	0.999968	0.0323774	0.0284683
GOTERM_BP_DIRECT	GO:0014824~artery smooth muscle contraction	3	1.66667	0.00387267	EDN1, EDNRA, AGT	180	9	16792	31.0963	0.999968	0.0323774	0.0284683
GOTERM_BP_DIRECT	GO:0010873~positive regulation of cholesterol esterification	3	1.66667	0.00387267	APOA1, APOE, AGT	180	9	16792	31.0963	0.999968	0.0323774	0.0284683
GOTERM_BP_DIRECT	GO:0045776~negative regulation of blood pressure	4	2.22222	0.0039136	NOS2, NOS3, NOS1, PPARA	180	30	16792	12.4385	0.999971	0.0325158	0.02859
GOTERM_BP_DIRECT	GO:0030217~T cell differentiation	4	2.22222	0.0039136	EGR1, CD4, LEP, IL2	180	30	16792	12.4385	0.999971	0.0325158	0.02859
GOTERM_BP_DIRECT	GO:0006950~response to stress	5	2.77778	0.00406053	HSP90AA1, MAPK8, MAPK1, EGFR, MTOR	180	61	16792	7.64663	0.999981	0.0336318	0.0295712
GOTERM_BP_DIRECT	GO:0043552~positive regulation of phosphatidylinositol 3-kinase activity	4	2.22222	0.00429931	PDGFRB, FLT1, PDGFB, RAC1	180	31	16792	12.0373	0.99999	0.0353897	0.0311169
GOTERM_BP_DIRECT	GO:0031667~response to nutrient levels	4	2.22222	0.00429931	MMP7, PON1, CYBA, SOD1	180	31	16792	12.0373	0.99999	0.0353897	0.0311169
GOTERM_CC_DIRECT	GO:0001772~immunological synapse	4	2.22222	0.00445817	CD81, GZMA, GZMB, ICAM1	180	34	18224	11.9111	0.73592	0.0369037	0.0308356
GOTERM_BP_DIRECT	GO:0050727~regulation of inflammatory response	5	2.77778	0.00455928	XIAP, PTGS2, SELE, RELA, BIRC2	180	63	16792	7.40388	0.999995	0.0374141	0.0328969
GOTERM_BP_DIRECT	GO:0042220~response to cocaine	4	2.22222	0.00470728	HSP90AA1, SMPD1, MTOR, HSPD1	180	32	16792	11.6611	0.999997	0.0382754	0.0336542
GOTERM_BP_DIRECT	GO:0001974~blood vessel remodeling	4	2.22222	0.00470728	NOS3, BAX, BAK1, AGT	180	32	16792	11.6611	0.999997	0.0382754	0.0336542
GOTERM_BP_DIRECT	GO:0007259~JAK-STAT cascade	4	2.22222	0.00470728	SOCS1, STAT1, STAT3, CCL2	180	32	16792	11.6611	0.999997	0.0382754	0.0336542
GOTERM_MF_DIRECT	GO:0050660~flavin adenine dinucleotide binding	5	2.77778	0.00473486	NOS2, NOS3, CYBB, NOS1, SDHA	180	64	16881	7.32682	0.923284	0.0452415	0.0399828
GOTERM_MF_DIRECT	GO:0016504~peptidase activator activity	3	1.66667	0.00475787	APP, MMP14, CAV1	180	10	16881	28.135	0.924237	0.0452415	0.0399828
GOTERM_MF_DIRECT	GO:0016176~superoxide-generating NADPH oxidase activator activity	3	1.66667	0.00475787	NCF1, PDGFB, AGT	180	10	16881	28.135	0.924237	0.0452415	0.0399828
GOTERM_BP_DIRECT	GO:0033160~positive regulation of protein import into nucleus, translocation	3	1.66667	0.00480701	IL6, HSP90AA1, IGF1	180	10	16792	27.9867	0.999997	0.0388494	0.0341589
GOTERM_BP_DIRECT	GO:0060252~positive regulation of glial cell proliferation	3	1.66667	0.00480701	MYC, LTA, MTOR	180	10	16792	27.9867	0.999997	0.0388494	0.0341589
GOTERM_BP_DIRECT	GO:0046330~positive regulation of JNK cascade	5	2.77778	0.0050977	IL1A, IL1B, HMGB1, TNF, TLR4	180	65	16792	7.17607	0.999999	0.0407819	0.0358581
GOTERM_BP_DIRECT	GO:0060326~cell chemotaxis	5	2.77778	0.0050977	PDGFRB, HGF, PDGFB, CCL2, CXCL1	180	65	16792	7.17607	0.999999	0.0407819	0.0358581
GOTERM_CC_DIRECT	GO:0005759~mitochondrial matrix	10	5.55556	0.00513717	CREB1, GPX1, TFAM, NR3C1, TP53, HSPD1, SIRT3, DECR1, BCL2L1, SOD1	180	327	18224	3.09616	0.784506	0.0413751	0.0345718
GOTERM_BP_DIRECT	GO:0002755~MyD88-dependent toll-like receptor signaling pathway	4	2.22222	0.00513788	IRAK1, TLR4, HSPD1, TLR2	180	33	16792	11.3077	0.999999	0.0407819	0.0358581
GOTERM_BP_DIRECT	GO:0015758~glucose transport	4	2.22222	0.00513788	EDN1, EDNRA, AKT1, SLC2A4	180	33	16792	11.3077	0.999999	0.0407819	0.0358581
GOTERM_BP_DIRECT	GO:0002931~response to ischemia	4	2.22222	0.00513788	EGR1, CAV1, BCL2, HSPD1	180	33	16792	11.3077	0.999999	0.0407819	0.0358581
GOTERM_BP_DIRECT	GO:0070059~intrinsic apoptotic signaling pathway in response to endoplasmic reticulum stress	4	2.22222	0.00513788	DDIT3, BCL2, BAX, BAK1	180	33	16792	11.3077	0.999999	0.0407819	0.0358581
GOTERM_BP_DIRECT	GO:0043330~response to exogenous dsRNA	4	2.22222	0.00559145	NFKBIA, IRF3, MAPK1, MAPK3	180	34	16792	10.9752	1	0.0442504	0.0389079
GOTERM_BP_DIRECT	GO:0050796~regulation of insulin secretion	5	2.77778	0.00567718	NOS2, LEP, IL1B, PRKCA, TNF	180	67	16792	6.96186	1	0.0447959	0.0393875
GOTERM_MF_DIRECT	GO:0016175~superoxide-generating NADPH oxidase activity	3	1.66667	0.00577479	NCF1, CYBB, CYBA	180	11	16881	25.5773	0.956423	0.0530498	0.0468835
GOTERM_MF_DIRECT	GO:0048407~platelet-derived growth factor binding	3	1.66667	0.00577479	PDGFRB, COL4A1, PDGFB	180	11	16881	25.5773	0.956423	0.0530498	0.0468835
GOTERM_BP_DIRECT	GO:0032495~response to muramyl dipeptide	3	1.66667	0.00583422	NFKBIA, MAPK14, RELA	180	11	16792	25.4424	1	0.0448411	0.0394273
GOTERM_BP_DIRECT	GO:0046325~negative regulation of glucose import	3	1.66667	0.00583422	LEP, MYC, TNF	180	11	16792	25.4424	1	0.0448411	0.0394273
GOTERM_BP_DIRECT	GO:0034116~positive regulation of heterotypic cell-cell adhesion	3	1.66667	0.00583422	IL10, IL1B, TNF	180	11	16792	25.4424	1	0.0448411	0.0394273
GOTERM_BP_DIRECT	GO:0031284~positive regulation of guanylate cyclase activity	3	1.66667	0.00583422	NOS2, NOS3, NOS1	180	11	16792	25.4424	1	0.0448411	0.0394273
GOTERM_BP_DIRECT	GO:0002523~leukocyte migration involved in inflammatory response	3	1.66667	0.00583422	CCL2, SELE, ELANE	180	11	16792	25.4424	1	0.0448411	0.0394273
GOTERM_BP_DIRECT	GO:0042535~positive regulation of tumor necrosis factor biosynthetic process	3	1.66667	0.00583422	CYBB, HSPB1, TLR4	180	11	16792	25.4424	1	0.0448411	0.0394273
GOTERM_BP_DIRECT	GO:0030278~regulation of ossification	3	1.66667	0.00583422	MAPK1, MAPK14, MAPK3	180	11	16792	25.4424	1	0.0448411	0.0394273
GOTERM_BP_DIRECT	GO:0050707~regulation of cytokine secretion	3	1.66667	0.00583422	SOCS1, TLR4, TLR2	180	11	16792	25.4424	1	0.0448411	0.0394273
GOTERM_BP_DIRECT	GO:0034374~low-density lipoprotein particle remodeling	3	1.66667	0.00583422	APOE, APOB, AGT	180	11	16792	25.4424	1	0.0448411	0.0394273
GOTERM_CC_DIRECT	GO:0043020~NADPH oxidase complex	3	1.66667	0.00593523	NCF1, CYBB, CYBA	180	12	18224	25.3111	0.830341	0.0465447	0.0388914
GOTERM_BP_DIRECT	GO:0018108~peptidyl-tyrosine phosphorylation	7	3.88889	0.00599675	PDGFRB, HSP90AA1, FLT1, EGF, INSR, PDGFB, EGFR	180	153	16792	4.26812	1	0.0459579	0.0404091
GOTERM_BP_DIRECT	GO:0006641~triglyceride metabolic process	4	2.22222	0.00606831	GPX1, CAV1, CAT, APOE	180	35	16792	10.6616	1	0.046373	0.0407741
GOTERM_MF_DIRECT	GO:0004879~RNA polymerase II transcription factor activity, ligand-activated sequence-specific DNA binding	4	2.22222	0.00647417	STAT3, NR1I2, PPARG, PPARA	180	36	16881	10.4204	0.97022	0.0584834	0.0516855
GOTERM_BP_DIRECT	GO:0043407~negative regulation of MAP kinase activity	4	2.22222	0.00656875	SMPD1, IL1B, GSTP1, APOE	180	36	16792	10.3654	1	0.0500539	0.0440106
GOTERM_BP_DIRECT	GO:0042738~exogenous drug catabolic process	3	1.66667	0.00695224	CYP1A2, NR1I2, NOS1	180	12	16792	23.3222	1	0.0520832	0.045795
GOTERM_BP_DIRECT	GO:0030212~hyaluronan metabolic process	3	1.66667	0.00695224	IL15, HGF, AKT1	180	12	16792	23.3222	1	0.0520832	0.045795
GOTERM_BP_DIRECT	GO:0010524~positive regulation of calcium ion transport into cytosol	3	1.66667	0.00695224	CD4, CAV1, BAK1	180	12	16792	23.3222	1	0.0520832	0.045795
GOTERM_BP_DIRECT	GO:0031669~cellular response to nutrient levels	3	1.66667	0.00695224	IL6, MTOR, ICAM1	180	12	16792	23.3222	1	0.0520832	0.045795
GOTERM_BP_DIRECT	GO:0019430~removal of superoxide radicals	3	1.66667	0.00695224	NOS3, SOD3, SOD1	180	12	16792	23.3222	1	0.0520832	0.045795
GOTERM_BP_DIRECT	GO:0007252~I-kappaB phosphorylation	3	1.66667	0.00695224	IKBKB, TLR4, TLR2	180	12	16792	23.3222	1	0.0520832	0.045795
GOTERM_BP_DIRECT	GO:0034605~cellular response to heat	4	2.22222	0.00709307	IL1A, IRAK1, HMOX1, HSPA1B	180	37	16792	10.0853	1	0.0529894	0.0465917
GOTERM_BP_DIRECT	GO:0045892~negative regulation of transcription, DNA-templated	13	7.22222	0.00732964	JUN, THRA, WNT5A, NR1I2, PDGFB, SIRT1, TNF, FOXO1, RELA, IL4, DDIT3, PPARG, TP53	180	499	16792	2.43037	1	0.0546037	0.0480112
GOTERM_MF_DIRECT	GO:0005088~Ras guanyl-nucleotide exchange factor activity	6	3.33333	0.00761596	PDGFRB, EGF, IL2RA, PDGFB, EGFR, IL2	180	115	16881	4.89304	0.984013	0.0676697	0.059804
GOTERM_BP_DIRECT	GO:0030522~intracellular receptor signaling pathway	4	2.22222	0.00764152	THRA, STAT3, NR1I2, PPARA	180	38	16792	9.81988	1	0.0564541	0.0496381
GOTERM_BP_DIRECT	GO:0032720~negative regulation of tumor necrosis factor production	4	2.22222	0.00764152	IL10, POMC, GSTP1, TLR4	180	38	16792	9.81988	1	0.0564541	0.0496381
GOTERM_BP_DIRECT	GO:0038128~ERBB2 signaling pathway	4	2.22222	0.00764152	HSP90AA1, EGF, AKT1, EGFR	180	38	16792	9.81988	1	0.0564541	0.0496381
GOTERM_MF_DIRECT	GO:0097153~cysteine-type endopeptidase activity involved in apoptotic process	3	1.66667	0.00807651	CASP7, CASP8, CASP3	180	13	16881	21.6423	0.987564	0.0706043	0.0623975
GOTERM_CC_DIRECT	GO:0042627~chylomicron	3	1.66667	0.00807864	APOA1, APOE, APOB	180	14	18224	21.6952	0.91083	0.0617291	0.051579
GOTERM_BP_DIRECT	GO:0090090~negative regulation of canonical Wnt signaling pathway	7	3.88889	0.00809097	EGR1, DDIT3, CAV1, WNT5A, APOE, MAPK14, FOXO1	180	163	16792	4.00627	1	0.0588112	0.0517106
GOTERM_BP_DIRECT	GO:0050901~leukocyte tethering or rolling	3	1.66667	0.00815903	LEP, SELE, TNF	180	13	16792	21.5282	1	0.0588112	0.0517106
GOTERM_BP_DIRECT	GO:0048546~digestive tract morphogenesis	3	1.66667	0.00815903	BCL2, HIF1A, EGFR	180	13	16792	21.5282	1	0.0588112	0.0517106
GOTERM_BP_DIRECT	GO:0010952~positive regulation of peptidase activity	3	1.66667	0.00815903	APP, MMP14, CAV1	180	13	16792	21.5282	1	0.0588112	0.0517106
GOTERM_BP_DIRECT	GO:0051770~positive regulation of nitric-oxide synthase biosynthetic process	3	1.66667	0.00815903	CCL2, TLR4, TLR2	180	13	16792	21.5282	1	0.0588112	0.0517106
GOTERM_BP_DIRECT	GO:0045730~respiratory burst	3	1.66667	0.00815903	NCF1, CYBB, CYBA	180	13	16792	21.5282	1	0.0588112	0.0517106
GOTERM_BP_DIRECT	GO:0071318~cellular response to ATP	3	1.66667	0.00815903	CCL2, PTGS2, SOD1	180	13	16792	21.5282	1	0.0588112	0.0517106
GOTERM_BP_DIRECT	GO:0001878~response to yeast	3	1.66667	0.00815903	APP, IL6, ELANE	180	13	16792	21.5282	1	0.0588112	0.0517106
GOTERM_BP_DIRECT	GO:0045019~negative regulation of nitric oxide biosynthetic process	3	1.66667	0.00815903	IL10, IL4, CAV1	180	13	16792	21.5282	1	0.0588112	0.0517106
GOTERM_BP_DIRECT	GO:0032570~response to progesterone	4	2.22222	0.00821436	CAV1, CCL2, RELA, TLR2	180	39	16792	9.56809	1	0.0590504	0.051921
GOTERM_CC_DIRECT	GO:0043235~receptor complex	6	3.33333	0.00839099	APP, FLT1, EGF, INSR, EGFR, TNFRSF1A	180	127	18224	4.7832	0.918818	0.0625129	0.0522339
GOTERM_BP_DIRECT	GO:0043124~negative regulation of I-kappaB kinase/NF-kappaB signaling	4	2.22222	0.00881183	CASP8, STAT1, GSTP1, SIRT1	180	40	16792	9.32889	1	0.0631751	0.0555477
GOTERM_CC_DIRECT	GO:0043005~neuron projection	8	4.44444	0.0090544	HSP90AA1, CASP8, RPS6KB1, FAS, VIM, HMGB1, PDLIM5, PTGS2	180	237	18224	3.41753	0.933497	0.06581	0.0549889
GOTERM_BP_DIRECT	GO:0007005~mitochondrion organization	5	2.77778	0.00923529	TERT, PARP1, NOS3, TFAM, SIRT3	180	77	16792	6.05772	1	0.0660336	0.058061
GOTERM_MF_DIRECT	GO:0015485~cholesterol binding	4	2.22222	0.00930017	ABCA1, CAV1, APOA1, APOE	180	41	16881	9.14959	0.993622	0.080011	0.0707108
GOTERM_BP_DIRECT	GO:0031397~negative regulation of protein ubiquitination	4	2.22222	0.00943413	CAV1, PRKCE, HSPA1B, MTOR	180	41	16792	9.10136	1	0.0666933	0.0586411
GOTERM_BP_DIRECT	GO:0001516~prostaglandin biosynthetic process	3	1.66667	0.00945259	EDN1, MIF, PTGS2	180	14	16792	19.9905	1	0.0666933	0.0586411
GOTERM_BP_DIRECT	GO:0071732~cellular response to nitric oxide	3	1.66667	0.00945259	MMP3, FOXO1, AQP1	180	14	16792	19.9905	1	0.0666933	0.0586411
GOTERM_BP_DIRECT	GO:0033700~phospholipid efflux	3	1.66667	0.00945259	ABCA1, APOA1, APOE	180	14	16792	19.9905	1	0.0666933	0.0586411
GOTERM_BP_DIRECT	GO:0042311~vasodilation	3	1.66667	0.00945259	GPX1, APOE, AGT	180	14	16792	19.9905	1	0.0666933	0.0586411
GOTERM_BP_DIRECT	GO:0010951~negative regulation of endopeptidase activity	6	3.33333	0.00958073	APP, SERPINE1, TIMP2, AKT1, TIMP1, AGT	180	121	16792	4.6259	1	0.067419	0.0592792
GOTERM_BP_DIRECT	GO:0031295~T cell costimulation	5	2.77778	0.00965526	CD4, CAV1, AKT1, RAC1, MTOR	180	78	16792	5.98006	1	0.0675868	0.0594267
GOTERM_BP_DIRECT	GO:0006805~xenobiotic metabolic process	5	2.77778	0.00965526	AOC3, AOC1, GSTP1, CYP1A2, NR1I2	180	78	16792	5.98006	1	0.0675868	0.0594267
GOTERM_BP_DIRECT	GO:0097191~extrinsic apoptotic signaling pathway	4	2.22222	0.0100815	CASP8, FAS, BAX, TNF	180	42	16792	8.88466	1	0.070019	0.0615652
GOTERM_BP_DIRECT	GO:0006986~response to unfolded protein	4	2.22222	0.0100815	HSP90AA1, DDIT3, HSPB1, HSPD1	180	42	16792	8.88466	1	0.070019	0.0615652
GOTERM_BP_DIRECT	GO:0007595~lactation	4	2.22222	0.0100815	CREB1, CAV1, HIF1A, VEGFA	180	42	16792	8.88466	1	0.070019	0.0615652
GOTERM_BP_DIRECT	GO:0046777~protein autophosphorylation	7	3.88889	0.0103844	PDGFRB, FLT1, IRAK1, INSR, AKT1, EGFR, MTOR	180	172	16792	3.79664	1	0.0719358	0.0632506
GOTERM_BP_DIRECT	GO:0001503~ossification	5	2.77778	0.010532	THRA, BCL2, TNFSF11, MMP9, EGFR	180	80	16792	5.83056	1	0.072581	0.0638179
GOTERM_BP_DIRECT	GO:0046718~viral entry into host cell	5	2.77778	0.010532	LAMP1, CD81, RPSA, HSPA1B, ICAM1	180	80	16792	5.83056	1	0.072581	0.0638179
GOTERM_MF_DIRECT	GO:0001046~core promoter sequence-specific DNA binding	4	2.22222	0.0106022	SP1, PPARG, SIRT1, TP53	180	43	16881	8.72403	0.996869	0.0867378	0.0766557
GOTERM_MF_DIRECT	GO:0005159~insulin-like growth factor receptor binding	3	1.66667	0.0107222	SOCS1, INSR, IGF1	180	15	16881	18.7567	0.997068	0.0867378	0.0766557
GOTERM_MF_DIRECT	GO:0005161~platelet-derived growth factor receptor binding	3	1.66667	0.0107222	PDGFRB, PDGFB, VEGFA	180	15	16881	18.7567	0.997068	0.0867378	0.0766557
GOTERM_MF_DIRECT	GO:0010181~FMN binding	3	1.66667	0.0107222	NOS2, NOS3, NOS1	180	15	16881	18.7567	0.997068	0.0867378	0.0766557
GOTERM_BP_DIRECT	GO:0043122~regulation of I-kappaB kinase/NF-kappaB signaling	3	1.66667	0.010831	IL1B, HSPB1, TNF	180	15	16792	18.6578	1	0.0731296	0.0643003
GOTERM_BP_DIRECT	GO:0060397~JAK-STAT cascade involved in growth hormone signaling pathway	3	1.66667	0.010831	STAT3, MAPK1, MAPK3	180	15	16792	18.6578	1	0.0731296	0.0643003
GOTERM_BP_DIRECT	GO:0048714~positive regulation of oligodendrocyte differentiation	3	1.66667	0.010831	PPARG, MTOR, TLR2	180	15	16792	18.6578	1	0.0731296	0.0643003
GOTERM_BP_DIRECT	GO:0042026~protein refolding	3	1.66667	0.010831	HSP90AA1, HSPA1B, HSPD1	180	15	16792	18.6578	1	0.0731296	0.0643003
GOTERM_BP_DIRECT	GO:0032270~positive regulation of cellular protein metabolic process	3	1.66667	0.010831	NFKBIA, AKT1, AGT	180	15	16792	18.6578	1	0.0731296	0.0643003
GOTERM_BP_DIRECT	GO:0051044~positive regulation of membrane protein ectodomain proteolysis	3	1.66667	0.010831	IL1B, APOE, TNF	180	15	16792	18.6578	1	0.0731296	0.0643003
GOTERM_BP_DIRECT	GO:0045725~positive regulation of glycogen biosynthetic process	3	1.66667	0.010831	INSR, AKT1, IGF1	180	15	16792	18.6578	1	0.0731296	0.0643003
GOTERM_BP_DIRECT	GO:0006112~energy reserve metabolic process	3	1.66667	0.010831	LEP, MYC, MTOR	180	15	16792	18.6578	1	0.0731296	0.0643003
GOTERM_BP_DIRECT	GO:0043085~positive regulation of catalytic activity	5	2.77778	0.010989	NCF1, CAV1, BCL2, CXCL1, SOD1	180	81	16792	5.75857	1	0.0740095	0.0650739
GOTERM_BP_DIRECT	GO:0035556~intracellular signal transduction	11	6.11111	0.0113434	EDN1, CXCL8, PRKCE, HSPB1, HMOX1, AKT1, CXCL1, PRKCA, RAC1, RAF1, MAPK14	180	403	16792	2.54635	1	0.0762037	0.0670033
GOTERM_BP_DIRECT	GO:0006879~cellular iron ion homeostasis	4	2.22222	0.011452	MYC, HMOX1, HIF1A, SOD1	180	44	16792	8.48081	1	0.0767399	0.0674747
GOTERM_CC_DIRECT	GO:0031143~pseudopodium	3	1.66667	0.0118429	MAPK1, RAF1, MAPK3	180	17	18224	17.8667	0.971282	0.0840281	0.0702114
GOTERM_CC_DIRECT	GO:0000790~nuclear chromatin	7	3.88889	0.0121307	CREB1, STAT1, SP1, STAT3, SIRT1, TP53, RELA	180	193	18224	3.67208	0.97367	0.0840687	0.0702453
GOTERM_MF_DIRECT	GO:0008191~metalloendopeptidase inhibitor activity	3	1.66667	0.0121692	TIMP2, TIMP1, RECK	180	16	16881	17.5844	0.998672	0.0942245	0.0832722
GOTERM_MF_DIRECT	GO:0048018~receptor agonist activity	3	1.66667	0.0121692	WNT5A, AGT, VEGFA	180	16	16881	17.5844	0.998672	0.0942245	0.0832722
GOTERM_MF_DIRECT	GO:0001190~transcriptional activator activity, RNA polymerase II transcription factor binding	3	1.66667	0.0121692	JUN, CREB1, PPARA	180	16	16881	17.5844	0.998672	0.0942245	0.0832722
GOTERM_BP_DIRECT	GO:0008542~visual learning	4	2.22222	0.0121755	APP, CREB1, HIF1A, MTOR	180	45	16792	8.29235	1	0.0809465	0.0711734
GOTERM_BP_DIRECT	GO:0030838~positive regulation of actin filament polymerization	4	2.22222	0.0121755	PRKCE, RAC1, MTOR, ICAM1	180	45	16792	8.29235	1	0.0809465	0.0711734
GOTERM_BP_DIRECT	GO:0032147~activation of protein kinase activity	4	2.22222	0.0121755	INSR, PDGFB, HMGB1, VEGFA	180	45	16792	8.29235	1	0.0809465	0.0711734
GOTERM_BP_DIRECT	GO:0090280~positive regulation of calcium ion import	3	1.66667	0.0122922	PDGFRB, PDGFB, CCL2	180	16	16792	17.4917	1	0.0809465	0.0711734
GOTERM_BP_DIRECT	GO:0030301~cholesterol transport	3	1.66667	0.0122922	CAV1, APOA1, APOB	180	16	16792	17.4917	1	0.0809465	0.0711734
GOTERM_BP_DIRECT	GO:0010592~positive regulation of lamellipodium assembly	3	1.66667	0.0122922	HSP90AA1, RAC1, MTOR	180	16	16792	17.4917	1	0.0809465	0.0711734
GOTERM_BP_DIRECT	GO:0090026~positive regulation of monocyte chemotaxis	3	1.66667	0.0122922	SERPINE1, CCL2, HMGB1	180	16	16792	17.4917	1	0.0809465	0.0711734
GOTERM_BP_DIRECT	GO:0051591~response to cAMP	4	2.22222	0.0129247	JUN, STAT1, RELA, BIRC2	180	46	16792	8.11208	1	0.0849021	0.0746514
GOTERM_MF_DIRECT	GO:0005543~phospholipid binding	5	2.77778	0.0132307	ABCA1, PON1, APOA1, APOE, APOB	180	86	16881	5.45252	0.999258	0.101	0.0892603
GOTERM_MF_DIRECT	GO:0004713~protein tyrosine kinase activity	6	3.33333	0.0137121	PDGFRB, HSP90AA1, FLT1, EGF, INSR, EGFR	180	133	16881	4.23083	0.99943	0.103221	0.0912233
GOTERM_BP_DIRECT	GO:0060749~mammary gland alveolus development	3	1.66667	0.0138344	EGF, TNFSF11, VEGFA	180	17	16792	16.4627	1	0.0884806	0.0777979
GOTERM_BP_DIRECT	GO:0042789~mRNA transcription from RNA polymerase II promoter	3	1.66667	0.0138344	DDIT3, STAT3, HIF1A	180	17	16792	16.4627	1	0.0884806	0.0777979
GOTERM_BP_DIRECT	GO:0071380~cellular response to prostaglandin E stimulus	3	1.66667	0.0138344	PRKCE, AKT1, PPARG	180	17	16792	16.4627	1	0.0884806	0.0777979
GOTERM_BP_DIRECT	GO:0055093~response to hyperoxia	3	1.66667	0.0138344	PDGFRB, CAT, CYP1A1	180	17	16792	16.4627	1	0.0884806	0.0777979
GOTERM_BP_DIRECT	GO:0030224~monocyte differentiation	3	1.66667	0.0138344	JUN, PPARG, VEGFA	180	17	16792	16.4627	1	0.0884806	0.0777979
GOTERM_BP_DIRECT	GO:1902041~regulation of extrinsic apoptotic signaling pathway via death domain receptors	3	1.66667	0.0138344	CASP8, TNFSF10, FAS	180	17	16792	16.4627	1	0.0884806	0.0777979
GOTERM_BP_DIRECT	GO:2000811~negative regulation of anoikis	3	1.66667	0.0138344	CAV1, BCL2, BCL2L1	180	17	16792	16.4627	1	0.0884806	0.0777979
GOTERM_BP_DIRECT	GO:0042523~positive regulation of tyrosine phosphorylation of Stat5 protein	3	1.66667	0.0138344	IL4, IGF1, IL2	180	17	16792	16.4627	1	0.0884806	0.0777979
GOTERM_BP_DIRECT	GO:1901216~positive regulation of neuron death	3	1.66667	0.0138344	PARP1, APOE, MTOR	180	17	16792	16.4627	1	0.0884806	0.0777979
GOTERM_BP_DIRECT	GO:2000778~positive regulation of interleukin-6 secretion	3	1.66667	0.0138344	IL1B, HMGB1, HSPD1	180	17	16792	16.4627	1	0.0884806	0.0777979
GOTERM_BP_DIRECT	GO:0042310~vasoconstriction	3	1.66667	0.0138344	EDN1, EDNRA, CAV1	180	17	16792	16.4627	1	0.0884806	0.0777979
GOTERM_BP_DIRECT	GO:0007204~positive regulation of cytosolic calcium ion concentration	6	3.33333	0.0144199	EDN1, EDNRA, HMGB1, CCR5, IL2, AGT	180	134	16792	4.17711	1	0.0920048	0.0808966
GOTERM_CC_DIRECT	GO:0005796~Golgi lumen	5	2.77778	0.0148487	ACAN, MMP14, PROC, WNT5A, SOD3	180	96	18224	5.27315	0.988416	0.100566	0.0840301
GOTERM_BP_DIRECT	GO:0001701~in utero embryonic development	7	3.88889	0.0151749	EDN1, EDNRA, NOS3, MYC, APOB, BCL2L1, VEGFA	180	187	16792	3.4921	1	0.0965905	0.0849286
GOTERM_BP_DIRECT	GO:0042752~regulation of circadian rhythm	4	2.22222	0.0153277	MAPK8, CREB1, PPARG, PPARA	180	49	16792	7.61542	1	0.0969893	0.0852793
GOTERM_MF_DIRECT	GO:0009055~electron carrier activity	5	2.77778	0.0154124	NCF1, CYP1A2, CYBB, CYBA, SDHA	180	90	16881	5.21019	0.999776	0.114432	0.101131
GOTERM_BP_DIRECT	GO:0043691~reverse cholesterol transport	3	1.66667	0.0154557	ABCA1, APOA1, APOE	180	18	16792	15.5481	1	0.0969893	0.0852793
GOTERM_BP_DIRECT	GO:0001782~B cell homeostasis	3	1.66667	0.0154557	BCL2, BAX, BAK1	180	18	16792	15.5481	1	0.0969893	0.0852793
GOTERM_BP_DIRECT	GO:0035066~positive regulation of histone acetylation	3	1.66667	0.0154557	IL1B, NOS1, MAPK3	180	18	16792	15.5481	1	0.0969893	0.0852793
GOTERM_BP_DIRECT	GO:0050870~positive regulation of T cell activation	3	1.66667	0.0154557	TNFSF11, CCL2, HSPD1	180	18	16792	15.5481	1	0.0969893	0.0852793
GOTERM_BP_DIRECT	GO:0033189~response to vitamin A	3	1.66667	0.0154557	CAT, CYP1A1, PPARG	180	18	16792	15.5481	1	0.0969893	0.0852793
GOTERM_CC_DIRECT	GO:0030139~endocytic vesicle	4	2.22222	0.016022	ABCA1, CCL2, APOA1, EGFR	180	54	18224	7.49959	0.991878	0.105141	0.0878528
GOTERM_CC_DIRECT	GO:0034361~very-low-density lipoprotein particle	3	1.66667	0.0162298	APOA1, APOE, APOB	180	20	18224	15.1867	0.992374	0.105141	0.0878528
GOTERM_CC_DIRECT	GO:0005905~clathrin-coated pit	4	2.22222	0.0168265	APP, SLC2A4, SELE, HSPD1	180	55	18224	7.36323	0.993635	0.106687	0.0891444
GOTERM_BP_DIRECT	GO:0032481~positive regulation of type I interferon production	4	2.22222	0.0170602	TBK1, IRAK1, IRF3, RELA	180	51	16792	7.31678	1	0.106645	0.0937689
GOTERM_BP_DIRECT	GO:0046716~muscle cell cellular homeostasis	3	1.66667	0.0171543	IL6, HIF1A, SOD1	180	19	16792	14.7298	1	0.106645	0.0937689
GOTERM_BP_DIRECT	GO:0045672~positive regulation of osteoclast differentiation	3	1.66667	0.0171543	CREB1, TNFSF11, TNF	180	19	16792	14.7298	1	0.106645	0.0937689
GOTERM_BP_DIRECT	GO:0001659~temperature homeostasis	3	1.66667	0.0171543	GPX1, STAT3, FOXO1	180	19	16792	14.7298	1	0.106645	0.0937689
GOTERM_CC_DIRECT	GO:0043209~myelin sheath	6	3.33333	0.0171944	HSP90AA1, BCL2, MIF, SDHA, HSPD1, SOD1	180	152	18224	3.99649	0.994307	0.106749	0.0891959
GOTERM_BP_DIRECT	GO:0006874~cellular calcium ion homeostasis	5	2.77778	0.0174893	CAV1, ATP2A2, CCL2, APOE, ELANE	180	93	16792	5.01553	1	0.108474	0.0953775
GOTERM_CC_DIRECT	GO:0042470~melanosome	5	2.77778	0.0175792	MMP14, HSP90AA1, LAMP1, TYRP1, RAC1	180	101	18224	5.0121	0.994934	0.106859	0.0892878
GOTERM_CC_DIRECT	GO:0030425~dendrite	9	5	0.0179293	NCF1, LAMP1, STAT1, CYBB, CCL2, CYBA, APOE, IL6ST, MTOR	180	335	18224	2.72	0.995444	0.106859	0.0892878
GOTERM_BP_DIRECT	GO:2000377~regulation of reactive oxygen species metabolic process	3	1.66667	0.0189283	TNF, FOXO1, BIRC2	180	20	16792	13.9933	1	0.116586	0.10251
GOTERM_BP_DIRECT	GO:0071375~cellular response to peptide hormone stimulus	3	1.66667	0.0189283	EDN1, CAV1, RELA	180	20	16792	13.9933	1	0.116586	0.10251
GOTERM_BP_DIRECT	GO:0001892~embryonic placenta development	3	1.66667	0.0189283	PDGFB, HIF1A, EGFR	180	20	16792	13.9933	1	0.116586	0.10251
GOTERM_CC_DIRECT	GO:0005777~peroxisome	5	2.77778	0.0193581	AOC1, NOS2, CAT, VIM, SOD1	180	104	18224	4.86752	0.997048	0.113112	0.0945131
GOTERM_MF_DIRECT	GO:0047485~protein N-terminus binding	5	2.77778	0.0197495	PARP1, PDLIM5, TP53, RELA, BIRC2	180	97	16881	4.83419	0.999979	0.144652	0.127838
GOTERM_MF_DIRECT	GO:0005509~calcium ion binding	15	8.33333	0.0206212	AOC3, AOC1, C1S, MMP1, EGF, PON1, MMP3, ATP2A2, MMP12, ACAN, MMP14, MMP13, PROC, MASP2, DSG3	180	717	16881	1.96199	0.999987	0.149023	0.131701
GOTERM_BP_DIRECT	GO:0032094~response to food	3	1.66667	0.020776	G6PD, CYP1A1, AKT1	180	21	16792	13.327	1	0.124304	0.109296
GOTERM_BP_DIRECT	GO:0048844~artery morphogenesis	3	1.66667	0.020776	APOE, APOB, VEGFA	180	21	16792	13.327	1	0.124304	0.109296
GOTERM_BP_DIRECT	GO:0006471~protein ADP-ribosylation	3	1.66667	0.020776	PARP1, SIRT1, SIRT3	180	21	16792	13.327	1	0.124304	0.109296
GOTERM_BP_DIRECT	GO:0042730~fibrinolysis	3	1.66667	0.020776	PLAU, SERPINE1, PLAT	180	21	16792	13.327	1	0.124304	0.109296
GOTERM_BP_DIRECT	GO:0033198~response to ATP	3	1.66667	0.020776	SELL, IL1B, HSPD1	180	21	16792	13.327	1	0.124304	0.109296
GOTERM_BP_DIRECT	GO:0071480~cellular response to gamma radiation	3	1.66667	0.020776	EGR1, CYBA, BCL2L1	180	21	16792	13.327	1	0.124304	0.109296
GOTERM_BP_DIRECT	GO:0035902~response to immobilization stress	3	1.66667	0.020776	CYP1A2, CYP1A1, PPARG	180	21	16792	13.327	1	0.124304	0.109296
GOTERM_BP_DIRECT	GO:0017055~negative regulation of RNA polymerase II transcriptional preinitiation complex assembly	2	1.11111	0.0212067	THRA, HMGB1	180	2	16792	93.2889	1	0.124304	0.109296
GOTERM_BP_DIRECT	GO:0002352~B cell negative selection	2	1.11111	0.0212067	BAX, BAK1	180	2	16792	93.2889	1	0.124304	0.109296
GOTERM_BP_DIRECT	GO:0001912~positive regulation of leukocyte mediated cytotoxicity	2	1.11111	0.0212067	NOS2, CCL2	180	2	16792	93.2889	1	0.124304	0.109296
GOTERM_BP_DIRECT	GO:0014806~smooth muscle hyperplasia	2	1.11111	0.0212067	NOS3, HMOX1	180	2	16792	93.2889	1	0.124304	0.109296
GOTERM_BP_DIRECT	GO:1902617~response to fluoride	2	1.11111	0.0212067	PON1, FOXO1	180	2	16792	93.2889	1	0.124304	0.109296
GOTERM_BP_DIRECT	GO:1904036~negative regulation of epithelial cell apoptotic process	2	1.11111	0.0212067	MST1, HMOX1	180	2	16792	93.2889	1	0.124304	0.109296
GOTERM_BP_DIRECT	GO:1902947~regulation of tau-protein kinase activity	2	1.11111	0.0212067	HGF, APOE	180	2	16792	93.2889	1	0.124304	0.109296
GOTERM_BP_DIRECT	GO:0072604~interleukin-6 secretion	2	1.11111	0.0212067	NOS2, LEP	180	2	16792	93.2889	1	0.124304	0.109296
GOTERM_BP_DIRECT	GO:0071506~cellular response to mycophenolic acid	2	1.11111	0.0212067	EGR1, PDGFB	180	2	16792	93.2889	1	0.124304	0.109296
GOTERM_BP_DIRECT	GO:0003057~regulation of the force of heart contraction by chemical signal	2	1.11111	0.0212067	NOS3, CAV1	180	2	16792	93.2889	1	0.124304	0.109296
GOTERM_BP_DIRECT	GO:1905049~negative regulation of metallopeptidase activity	2	1.11111	0.0212067	TIMP2, TIMP1	180	2	16792	93.2889	1	0.124304	0.109296
GOTERM_BP_DIRECT	GO:0006808~regulation of nitrogen utilization	2	1.11111	0.0212067	BCL2, BAX	180	2	16792	93.2889	1	0.124304	0.109296
GOTERM_BP_DIRECT	GO:0032707~negative regulation of interleukin-23 production	2	1.11111	0.0212067	RAC1, TLR4	180	2	16792	93.2889	1	0.124304	0.109296
GOTERM_BP_DIRECT	GO:0002876~positive regulation of chronic inflammatory response to antigenic stimulus	2	1.11111	0.0212067	LTA, TNF	180	2	16792	93.2889	1	0.124304	0.109296
GOTERM_BP_DIRECT	GO:0070101~positive regulation of chemokine-mediated signaling pathway	2	1.11111	0.0212067	EDN1, HIF1A	180	2	16792	93.2889	1	0.124304	0.109296
GOTERM_BP_DIRECT	GO:0006469~negative regulation of protein kinase activity	5	2.77778	0.0214768	IL6, SOCS1, GSTP1, HSPB1, AKT1	180	99	16792	4.71156	1	0.125611	0.110445
GOTERM_BP_DIRECT	GO:0006749~glutathione metabolic process	4	2.22222	0.0218519	G6PD, GPX1, GSTP1, SOD1	180	56	16792	6.66349	1	0.127247	0.111883
GOTERM_BP_DIRECT	GO:0016049~cell growth	4	2.22222	0.0218519	IL6, EDN1, BCL2, MTOR	180	56	16792	6.66349	1	0.127247	0.111883
GOTERM_MF_DIRECT	GO:0035257~nuclear hormone receptor binding	3	1.66667	0.0224734	STAT1, HIF1A, SIRT1	180	22	16881	12.7886	0.999995	0.160271	0.141642
GOTERM_BP_DIRECT	GO:2001243~negative regulation of intrinsic apoptotic signaling pathway	3	1.66667	0.0226956	BCL2, MMP9, BCL2L1	180	22	16792	12.7212	1	0.131016	0.115197
GOTERM_BP_DIRECT	GO:0001502~cartilage condensation	3	1.66667	0.0226956	ACAN, THRA, MAPK14	180	22	16792	12.7212	1	0.131016	0.115197
GOTERM_BP_DIRECT	GO:0046427~positive regulation of JAK-STAT cascade	3	1.66667	0.0226956	IL10, IL6, LEP	180	22	16792	12.7212	1	0.131016	0.115197
GOTERM_BP_DIRECT	GO:0090023~positive regulation of neutrophil chemotaxis	3	1.66667	0.0226956	CXCL8, CXCL1, RAC1	180	22	16792	12.7212	1	0.131016	0.115197
GOTERM_BP_DIRECT	GO:0043401~steroid hormone mediated signaling pathway	4	2.22222	0.0228894	THRA, NR1I2, PPARG, PPARA	180	57	16792	6.54659	1	0.131849	0.11593
GOTERM_CC_DIRECT	GO:0005789~endoplasmic reticulum membrane	16	8.88889	0.0229837	ABCA1, CAV1, CYBB, ATP2A2, CYBA, PTGS2, EGFR, MTOR, CD4, CYP1A2, CYP1A1, BCL2, BAX, HMOX1, RAC1, APOB	180	862	18224	1.87925	0.999021	0.131714	0.110056
GOTERM_MF_DIRECT	GO:0000976~transcription regulatory region sequence-specific DNA binding	4	2.22222	0.0236292	EGR1, THRA, DDIT3, NFE2L2	180	58	16881	6.46782	0.999998	0.165043	0.145859
GOTERM_MF_DIRECT	GO:0019904~protein domain specific binding	7	3.88889	0.0237516	THRA, LAMP1, IL1B, WNT5A, PPARA, MTOR, NFE2L2	180	208	16881	3.15617	0.999998	0.165043	0.145859
GOTERM_BP_DIRECT	GO:0030316~osteoclast differentiation	3	1.66667	0.0246854	TNFSF11, MAPK14, TNF	180	23	16792	12.1681	1	0.140675	0.123691
GOTERM_BP_DIRECT	GO:0016239~positive regulation of macroautophagy	3	1.66667	0.0246854	HMOX1, HIF1A, SIRT1	180	23	16792	12.1681	1	0.140675	0.123691
GOTERM_BP_DIRECT	GO:0009617~response to bacterium	3	1.66667	0.0246854	NOS2, CAV1, CCL2	180	23	16792	12.1681	1	0.140675	0.123691
GOTERM_BP_DIRECT	GO:0043278~response to morphine	3	1.66667	0.0246854	PRKCE, RELA, MTOR	180	23	16792	12.1681	1	0.140675	0.123691
GOTERM_BP_DIRECT	GO:0048754~branching morphogenesis of an epithelial tube	3	1.66667	0.0246854	MMP14, EGF, VEGFA	180	23	16792	12.1681	1	0.140675	0.123691
GOTERM_CC_DIRECT	GO:0032993~protein-DNA complex	3	1.66667	0.0248197	SP1, DDIT3, NFE2L2	180	25	18224	12.1493	0.999441	0.139552	0.116606
GOTERM_MF_DIRECT	GO:0005178~integrin binding	5	2.77778	0.0255458	MMP14, TIMP2, IGF1, EGFR, ICAM1	180	105	16881	4.46587	0.999999	0.175263	0.154891
GOTERM_BP_DIRECT	GO:0045669~positive regulation of osteoblast differentiation	4	2.22222	0.0261604	IL6, HGF, IGF1, IL6ST	180	60	16792	6.21926	1	0.148763	0.130802
GOTERM_MF_DIRECT	GO:0005524~ATP binding	25	13.8889	0.0265508	FLT1, ATP2A2, EGFR, HSPD1, PTPA, IKBKB, MAPK8, TBK1, IRAK1, AKT1, MAPK1, MAPK3, ABCA1, PDGFRB, ABCC1, HSP90AA1, PRKCE, INSR, PRKCA, MAPK14, MTOR, RPS6KB1, RAF1, TP53, HSPA1B	180	1495	16881	1.56828	1	0.178406	0.157669
GOTERM_MF_DIRECT	GO:0004888~transmembrane signaling receptor activity	7	3.88889	0.0266622	CD4, FAS, SELE, TLR4, EGFR, ICAM1, TLR2	180	214	16881	3.06768	1	0.178406	0.157669
GOTERM_BP_DIRECT	GO:0001819~positive regulation of cytokine production	3	1.66667	0.0267436	TNF, AGT, SOD1	180	24	16792	11.6611	1	0.151434	0.13315
GOTERM_BP_DIRECT	GO:0045742~positive regulation of epidermal growth factor receptor signaling pathway	3	1.66667	0.0267436	AKT1, MMP9, AGT	180	24	16792	11.6611	1	0.151434	0.13315
GOTERM_BP_DIRECT	GO:0001523~retinoid metabolic process	4	2.22222	0.0273035	TTR, APOA1, APOE, APOB	180	61	16792	6.1173	1	0.154276	0.13565
GOTERM_MF_DIRECT	GO:0046934~phosphatidylinositol-4,5-bisphosphate 3-kinase activity	4	2.22222	0.0280921	PDGFRB, EGF, PDGFB, EGFR	180	62	16881	6.05054	1	0.185682	0.164099
GOTERM_BP_DIRECT	GO:0006968~cellular defense response	4	2.22222	0.0284729	IL4, NCF1, CCR5, RELA	180	62	16792	6.01864	1	0.160544	0.141161
GOTERM_CC_DIRECT	GO:0005719~nuclear euchromatin	3	1.66667	0.0286711	JUN, CREB1, SIRT1	180	27	18224	11.2494	0.999828	0.152554	0.127469
GOTERM_CC_DIRECT	GO:0008305~integrin complex	3	1.66667	0.0286711	ITGAM, ITGA2B, ITGAL	180	27	18224	11.2494	0.999828	0.152554	0.127469
GOTERM_BP_DIRECT	GO:0051899~membrane depolarization	3	1.66667	0.0288687	EDN1, JUN, CAV1	180	25	16792	11.1947	1	0.160737	0.14133
GOTERM_BP_DIRECT	GO:0042327~positive regulation of phosphorylation	3	1.66667	0.0288687	EGF, MIF, EGFR	180	25	16792	11.1947	1	0.160737	0.14133
GOTERM_BP_DIRECT	GO:0007159~leukocyte cell-cell adhesion	3	1.66667	0.0288687	ITGAL, SELE, ICAM1	180	25	16792	11.1947	1	0.160737	0.14133
GOTERM_BP_DIRECT	GO:0070423~nucleotide-binding oligomerization domain containing signaling pathway	3	1.66667	0.0288687	IKBKB, CASP8, IRAK1	180	25	16792	11.1947	1	0.160737	0.14133
GOTERM_BP_DIRECT	GO:0060135~maternal process involved in female pregnancy	3	1.66667	0.0288687	MMP7, CCL2, MTOR	180	25	16792	11.1947	1	0.160737	0.14133
GOTERM_BP_DIRECT	GO:0019433~triglyceride catabolic process	3	1.66667	0.0288687	APOA1, APOE, APOB	180	25	16792	11.1947	1	0.160737	0.14133
GOTERM_CC_DIRECT	GO:0097136~Bcl-2 family protein complex	2	1.11111	0.0291797	BAX, BCL2L1	180	3	18224	67.4963	0.999853	0.152554	0.127469
GOTERM_CC_DIRECT	GO:0005896~interleukin-6 receptor complex	2	1.11111	0.0291797	IL6, IL6ST	180	3	18224	67.4963	0.999853	0.152554	0.127469
GOTERM_CC_DIRECT	GO:0031226~intrinsic component of plasma membrane	3	1.66667	0.0306805	PDGFRB, TLR4, TLR2	180	28	18224	10.8476	0.999907	0.157634	0.131715
GOTERM_BP_DIRECT	GO:0060337~type I interferon signaling pathway	4	2.22222	0.0308905	EGR1, IRF3, STAT1, IRF4	180	64	16792	5.83056	1	0.162598	0.142967
GOTERM_BP_DIRECT	GO:0035025~positive regulation of Rho protein signal transduction	3	1.66667	0.031059	PDGFRB, APOA1, RAC1	180	26	16792	10.7641	1	0.162598	0.142967
GOTERM_BP_DIRECT	GO:0042755~eating behavior	3	1.66667	0.031059	LEP, STAT3, IAPP	180	26	16792	10.7641	1	0.162598	0.142967
GOTERM_BP_DIRECT	GO:0045930~negative regulation of mitotic cell cycle	3	1.66667	0.031059	IL10, TIMP2, EGFR	180	26	16792	10.7641	1	0.162598	0.142967
GOTERM_BP_DIRECT	GO:2001238~positive regulation of extrinsic apoptotic signaling pathway	3	1.66667	0.031059	CAV1, TNFSF10, AGT	180	26	16792	10.7641	1	0.162598	0.142967
GOTERM_MF_DIRECT	GO:0097200~cysteine-type endopeptidase activity involved in execution phase of apoptosis	2	1.11111	0.0314766	CASP7, CASP3	180	3	16881	62.5222	1	0.20462	0.180836
GOTERM_BP_DIRECT	GO:0014854~response to inactivity	2	1.11111	0.0316417	IL10, CAT	180	3	16792	62.1926	1	0.162598	0.142967
GOTERM_BP_DIRECT	GO:0070424~regulation of nucleotide-binding oligomerization domain containing signaling pathway	2	1.11111	0.0316417	XIAP, BIRC2	180	3	16792	62.1926	1	0.162598	0.142967
GOTERM_BP_DIRECT	GO:0045079~negative regulation of chemokine biosynthetic process	2	1.11111	0.0316417	IL6, ELANE	180	3	16792	62.1926	1	0.162598	0.142967
GOTERM_BP_DIRECT	GO:0000189~MAPK import into nucleus	2	1.11111	0.0316417	MAPK1, MAPK3	180	3	16792	62.1926	1	0.162598	0.142967
GOTERM_BP_DIRECT	GO:0034465~response to carbon monoxide	2	1.11111	0.0316417	IL10, SOD1	180	3	16792	62.1926	1	0.162598	0.142967
GOTERM_BP_DIRECT	GO:0070434~positive regulation of nucleotide-binding oligomerization domain containing 2 signaling pathway	2	1.11111	0.0316417	TLR4, HSPA1B	180	3	16792	62.1926	1	0.162598	0.142967
GOTERM_BP_DIRECT	GO:0035793~positive regulation of metanephric mesenchymal cell migration by platelet-derived growth factor receptor-beta signaling pathway	2	1.11111	0.0316417	PDGFRB, PDGFB	180	3	16792	62.1926	1	0.162598	0.142967
GOTERM_BP_DIRECT	GO:0060559~positive regulation of calcidiol 1-monooxygenase activity	2	1.11111	0.0316417	IL1B, TNF	180	3	16792	62.1926	1	0.162598	0.142967
GOTERM_BP_DIRECT	GO:0019087~transformation of host cell by virus	2	1.11111	0.0316417	MYC, INSR	180	3	16792	62.1926	1	0.162598	0.142967
GOTERM_BP_DIRECT	GO:1903660~negative regulation of complement-dependent cytotoxicity	2	1.11111	0.0316417	IL4, IL13	180	3	16792	62.1926	1	0.162598	0.142967
GOTERM_BP_DIRECT	GO:0061308~cardiac neural crest cell development involved in heart development	2	1.11111	0.0316417	MAPK1, MAPK3	180	3	16792	62.1926	1	0.162598	0.142967
GOTERM_BP_DIRECT	GO:0048597~post-embryonic camera-type eye morphogenesis	2	1.11111	0.0316417	BAX, BAK1	180	3	16792	62.1926	1	0.162598	0.142967
GOTERM_BP_DIRECT	GO:0033590~response to cobalamin	2	1.11111	0.0316417	RELA, EGFR	180	3	16792	62.1926	1	0.162598	0.142967
GOTERM_BP_DIRECT	GO:0071288~cellular response to mercury ion	2	1.11111	0.0316417	IL4, AQP1	180	3	16792	62.1926	1	0.162598	0.142967
GOTERM_BP_DIRECT	GO:0032800~receptor biosynthetic process	2	1.11111	0.0316417	IL10, TNF	180	3	16792	62.1926	1	0.162598	0.142967
GOTERM_BP_DIRECT	GO:0055098~response to low-density lipoprotein particle	2	1.11111	0.0316417	ABCA1, PPARG	180	3	16792	62.1926	1	0.162598	0.142967
GOTERM_BP_DIRECT	GO:0038091~positive regulation of cell proliferation by VEGF-activated platelet derived growth factor receptor signaling pathway	2	1.11111	0.0316417	PDGFRB, VEGFA	180	3	16792	62.1926	1	0.162598	0.142967
GOTERM_BP_DIRECT	GO:0070141~response to UV-A	2	1.11111	0.0316417	AKT1, EGFR	180	3	16792	62.1926	1	0.162598	0.142967
GOTERM_BP_DIRECT	GO:0002693~positive regulation of cellular extravasation	2	1.11111	0.0316417	CCL2, ICAM1	180	3	16792	62.1926	1	0.162598	0.142967
GOTERM_BP_DIRECT	GO:0002904~positive regulation of B cell apoptotic process	2	1.11111	0.0316417	IL10, BAX	180	3	16792	62.1926	1	0.162598	0.142967
GOTERM_BP_DIRECT	GO:0010041~response to iron(III) ion	2	1.11111	0.0316417	G6PD, CYP1A1	180	3	16792	62.1926	1	0.162598	0.142967
GOTERM_BP_DIRECT	GO:0044346~fibroblast apoptotic process	2	1.11111	0.0316417	MYC, BAK1	180	3	16792	62.1926	1	0.162598	0.142967
GOTERM_BP_DIRECT	GO:0018158~protein oxidation	2	1.11111	0.0316417	GPX1, APOA1	180	3	16792	62.1926	1	0.162598	0.142967
GOTERM_BP_DIRECT	GO:2000366~positive regulation of STAT protein import into nucleus	2	1.11111	0.0316417	IL6, LEP	180	3	16792	62.1926	1	0.162598	0.142967
GOTERM_BP_DIRECT	GO:0030185~nitric oxide transport	2	1.11111	0.0316417	EDN1, AQP1	180	3	16792	62.1926	1	0.162598	0.142967
GOTERM_BP_DIRECT	GO:1904845~cellular response to L-glutamine	2	1.11111	0.0316417	CYBB, CYBA	180	3	16792	62.1926	1	0.162598	0.142967
GOTERM_BP_DIRECT	GO:0002291~T cell activation via T cell receptor contact with antigen bound to MHC molecule on antigen presenting cell	2	1.11111	0.0316417	ITGAL, ICAM1	180	3	16792	62.1926	1	0.162598	0.142967
GOTERM_BP_DIRECT	GO:0010871~negative regulation of receptor biosynthetic process	2	1.11111	0.0316417	PPARG, PPARA	180	3	16792	62.1926	1	0.162598	0.142967
GOTERM_BP_DIRECT	GO:0051097~negative regulation of helicase activity	2	1.11111	0.0316417	SIRT1, TP53	180	3	16792	62.1926	1	0.162598	0.142967
GOTERM_BP_DIRECT	GO:1990646~cellular response to prolactin	2	1.11111	0.0316417	IL6, MYC	180	3	16792	62.1926	1	0.162598	0.142967
GOTERM_BP_DIRECT	GO:2000491~positive regulation of hepatic stellate cell activation	2	1.11111	0.0316417	PDGFRB, LEP	180	3	16792	62.1926	1	0.162598	0.142967
GOTERM_BP_DIRECT	GO:0001660~fever generation	2	1.11111	0.0316417	IL1A, IL1B	180	3	16792	62.1926	1	0.162598	0.142967
GOTERM_BP_DIRECT	GO:0046013~regulation of T cell homeostatic proliferation	2	1.11111	0.0316417	IL2RA, IL2	180	3	16792	62.1926	1	0.162598	0.142967
GOTERM_BP_DIRECT	GO:1903598~positive regulation of gap junction assembly	2	1.11111	0.0316417	CAV1, AGT	180	3	16792	62.1926	1	0.162598	0.142967
GOTERM_BP_DIRECT	GO:0032310~prostaglandin secretion	2	1.11111	0.0316417	NOS2, LEP	180	3	16792	62.1926	1	0.162598	0.142967
GOTERM_MF_DIRECT	GO:0000980~RNA polymerase II distal enhancer sequence-specific DNA binding	4	2.22222	0.0317124	JUN, CREB1, RELA, NFE2L2	180	65	16881	5.77128	1	0.20462	0.180836
GOTERM_BP_DIRECT	GO:0051607~defense response to virus	6	3.33333	0.0319578	IL6, TBK1, IRF3, STAT1, BCL2, RELA	180	165	16792	3.39232	1	0.163907	0.144117
GOTERM_CC_DIRECT	GO:0016323~basolateral plasma membrane	6	3.33333	0.0326168	HSP90AA1, ABCC1, CAV1, PDGFB, EGFR, AQP1	180	180	18224	3.37481	0.999949	0.164743	0.137654
GOTERM_MF_DIRECT	GO:0003705~transcription factor activity, RNA polymerase II distal enhancer sequence-specific binding	4	2.22222	0.0329709	JUN, CREB1, HIF1A, RELA	180	66	16881	5.68384	1	0.20793	0.183761
GOTERM_MF_DIRECT	GO:0001103~RNA polymerase II repressing transcription factor binding	3	1.66667	0.0329926	SP1, STAT3, PPARA	180	27	16881	10.4204	1	0.20793	0.183761
GOTERM_BP_DIRECT	GO:0010800~positive regulation of peptidyl-threonine phosphorylation	3	1.66667	0.0333128	EGF, WNT5A, MAPK1	180	27	16792	10.3654	1	0.170202	0.149652
GOTERM_BP_DIRECT	GO:0035987~endodermal cell differentiation	3	1.66667	0.0333128	MMP14, MMP2, MMP9	180	27	16792	10.3654	1	0.170202	0.149652
GOTERM_BP_DIRECT	GO:0030593~neutrophil chemotaxis	4	2.22222	0.0334127	EDN1, CXCL8, IL1B, CCL2	180	66	16792	5.65387	1	0.170385	0.149814
GOTERM_MF_DIRECT	GO:0003950~NAD+ ADP-ribosyltransferase activity	3	1.66667	0.0352874	PARP1, SIRT1, SIRT3	180	28	16881	10.0482	1	0.219836	0.194283
GOTERM_BP_DIRECT	GO:0000060~protein import into nucleus, translocation	3	1.66667	0.0356286	NFKBIA, AKT1, TNF	180	28	16792	9.99524	1	0.179625	0.157938
GOTERM_BP_DIRECT	GO:0061418~regulation of transcription from RNA polymerase II promoter in response to hypoxia	3	1.66667	0.0356286	EGR1, HIF1A, VEGFA	180	28	16792	9.99524	1	0.179625	0.157938
GOTERM_BP_DIRECT	GO:0009314~response to radiation	3	1.66667	0.0356286	JUN, BCL2, TXN	180	28	16792	9.99524	1	0.179625	0.157938
GOTERM_BP_DIRECT	GO:0040007~growth	3	1.66667	0.0356286	MTOR, BCL2L1, VEGFA	180	28	16792	9.99524	1	0.179625	0.157938
GOTERM_BP_DIRECT	GO:0032689~negative regulation of interferon-gamma production	3	1.66667	0.0356286	IL10, HMGB1, TLR4	180	28	16792	9.99524	1	0.179625	0.157938
GOTERM_BP_DIRECT	GO:0045931~positive regulation of mitotic cell cycle	3	1.66667	0.0356286	APP, RPS6KB1, PRKCA	180	28	16792	9.99524	1	0.179625	0.157938
GOTERM_BP_DIRECT	GO:0001937~negative regulation of endothelial cell proliferation	3	1.66667	0.0380048	STAT1, CAV1, APOE	180	29	16792	9.65057	1	0.18875	0.165961
GOTERM_BP_DIRECT	GO:0042149~cellular response to glucose starvation	3	1.66667	0.0380048	BCL2, TP53, NFE2L2	180	29	16792	9.65057	1	0.18875	0.165961
GOTERM_BP_DIRECT	GO:0051973~positive regulation of telomerase activity	3	1.66667	0.0380048	MYC, MAPK1, MAPK3	180	29	16792	9.65057	1	0.18875	0.165961
GOTERM_BP_DIRECT	GO:0050766~positive regulation of phagocytosis	3	1.66667	0.0380048	IL1B, CYBA, TNF	180	29	16792	9.65057	1	0.18875	0.165961
GOTERM_BP_DIRECT	GO:0042113~B cell activation	3	1.66667	0.0380048	IL4, CASP8, HSPD1	180	29	16792	9.65057	1	0.18875	0.165961
GOTERM_BP_DIRECT	GO:0048873~homeostasis of number of cells within a tissue	3	1.66667	0.0380048	BCL2, BAX, RAC1	180	29	16792	9.65057	1	0.18875	0.165961
GOTERM_BP_DIRECT	GO:0048008~platelet-derived growth factor receptor signaling pathway	3	1.66667	0.0380048	PDGFRB, PDGFB, PLAT	180	29	16792	9.65057	1	0.18875	0.165961
GOTERM_BP_DIRECT	GO:0048662~negative regulation of smooth muscle cell proliferation	3	1.66667	0.0380048	IL15, HMOX1, PPARG	180	29	16792	9.65057	1	0.18875	0.165961
GOTERM_CC_DIRECT	GO:0034363~intermediate-density lipoprotein particle	2	1.11111	0.0387169	APOE, APOB	180	4	18224	50.6222	0.999992	0.192294	0.160675
GOTERM_BP_DIRECT	GO:0031647~regulation of protein stability	4	2.22222	0.0387681	TERT, CD81, BCL2, MAPK1	180	70	16792	5.33079	1	0.191471	0.168354
GOTERM_BP_DIRECT	GO:0007265~Ras protein signal transduction	4	2.22222	0.0387681	JUN, IGF1, MAPK14, TP53	180	70	16792	5.33079	1	0.191471	0.168354
GOTERM_BP_DIRECT	GO:0030855~epithelial cell differentiation	4	2.22222	0.0387681	COL4A1, RPSA, PPARG, VEGFA	180	70	16792	5.33079	1	0.191471	0.168354
GOTERM_BP_DIRECT	GO:0032088~negative regulation of NF-kappaB transcription factor activity	4	2.22222	0.0401712	NFKBIA, IRAK1, CAT, SIRT1	180	71	16792	5.25571	1	0.192972	0.169673
GOTERM_BP_DIRECT	GO:0060333~interferon-gamma-mediated signaling pathway	4	2.22222	0.0401712	IRF3, STAT1, IRF4, ICAM1	180	71	16792	5.25571	1	0.192972	0.169673
GOTERM_BP_DIRECT	GO:0070098~chemokine-mediated signaling pathway	4	2.22222	0.0401712	CXCL8, CCL2, CXCL1, CCR5	180	71	16792	5.25571	1	0.192972	0.169673
GOTERM_BP_DIRECT	GO:0044344~cellular response to fibroblast growth factor stimulus	3	1.66667	0.0404399	CXCL8, MYC, CCL2	180	30	16792	9.32889	1	0.192972	0.169673
GOTERM_BP_DIRECT	GO:0030449~regulation of complement activation	3	1.66667	0.0404399	CFI, C4BPA, CFB	180	30	16792	9.32889	1	0.192972	0.169673
GOTERM_BP_DIRECT	GO:0030308~negative regulation of cell growth	5	2.77778	0.0405818	BCL2, PPARG, SIRT1, TP53, AGT	180	121	16792	3.85491	1	0.192972	0.169673
GOTERM_CC_DIRECT	GO:0090575~RNA polymerase II transcription factor complex	3	1.66667	0.0415155	STAT3, PPARG, HIF1A	180	33	18224	9.20404	0.999997	0.202813	0.169465
GOTERM_BP_DIRECT	GO:0016485~protein processing	4	2.22222	0.0415998	MMP14, CASP7, GZMB, CTSG	180	72	16792	5.18272	1	0.192972	0.169673
GOTERM_MF_DIRECT	GO:0051022~Rho GDP-dissociation inhibitor binding	2	1.11111	0.0417483	HSP90AA1, RAC1	180	4	16881	46.8917	1	0.251418	0.222194
GOTERM_MF_DIRECT	GO:0043208~glycosphingolipid binding	2	1.11111	0.0417483	SELL, IL2	180	4	16881	46.8917	1	0.251418	0.222194
GOTERM_MF_DIRECT	GO:0051425~PTB domain binding	2	1.11111	0.0417483	APP, INSR	180	4	16881	46.8917	1	0.251418	0.222194
GOTERM_BP_DIRECT	GO:0033864~positive regulation of NAD(P)H oxidase activity	2	1.11111	0.0419661	CYBA, AGT	180	4	16792	46.6444	1	0.192972	0.169673
GOTERM_BP_DIRECT	GO:0038001~paracrine signaling	2	1.11111	0.0419661	PDGFB, TNFSF11	180	4	16792	46.6444	1	0.192972	0.169673
GOTERM_BP_DIRECT	GO:0030260~entry into host cell	2	1.11111	0.0419661	CD4, CCR5	180	4	16792	46.6444	1	0.192972	0.169673
GOTERM_BP_DIRECT	GO:0010574~regulation of vascular endothelial growth factor production	2	1.11111	0.0419661	IL6, CCL2	180	4	16792	46.6444	1	0.192972	0.169673
GOTERM_BP_DIRECT	GO:0018119~peptidyl-cysteine S-nitrosylation	2	1.11111	0.0419661	NOS2, NOS1	180	4	16792	46.6444	1	0.192972	0.169673
GOTERM_BP_DIRECT	GO:0071677~positive regulation of mononuclear cell migration	2	1.11111	0.0419661	IL4, TNF	180	4	16792	46.6444	1	0.192972	0.169673
GOTERM_BP_DIRECT	GO:0010193~response to ozone	2	1.11111	0.0419661	EDN1, CAT	180	4	16792	46.6444	1	0.192972	0.169673
GOTERM_BP_DIRECT	GO:0097411~hypoxia-inducible factor-1alpha signaling pathway	2	1.11111	0.0419661	CYBB, HIF1A	180	4	16792	46.6444	1	0.192972	0.169673
GOTERM_BP_DIRECT	GO:0030730~sequestering of triglyceride	2	1.11111	0.0419661	IL1B, TNF	180	4	16792	46.6444	1	0.192972	0.169673
GOTERM_BP_DIRECT	GO:0090400~stress-induced premature senescence	2	1.11111	0.0419661	MAPK14, SIRT1	180	4	16792	46.6444	1	0.192972	0.169673
GOTERM_BP_DIRECT	GO:0010523~negative regulation of calcium ion transport into cytosol	2	1.11111	0.0419661	BCL2, NOS1	180	4	16792	46.6444	1	0.192972	0.169673
GOTERM_BP_DIRECT	GO:0002925~positive regulation of humoral immune response mediated by circulating immunoglobulin	2	1.11111	0.0419661	LTA, TNF	180	4	16792	46.6444	1	0.192972	0.169673
GOTERM_BP_DIRECT	GO:0072606~interleukin-8 secretion	2	1.11111	0.0419661	NOS2, LEP	180	4	16792	46.6444	1	0.192972	0.169673
GOTERM_BP_DIRECT	GO:0051771~negative regulation of nitric-oxide synthase biosynthetic process	2	1.11111	0.0419661	EDN1, GSTP1	180	4	16792	46.6444	1	0.192972	0.169673
GOTERM_BP_DIRECT	GO:0046886~positive regulation of hormone biosynthetic process	2	1.11111	0.0419661	EGR1, HIF1A	180	4	16792	46.6444	1	0.192972	0.169673
GOTERM_BP_DIRECT	GO:0006642~triglyceride mobilization	2	1.11111	0.0419661	APOB, SIRT1	180	4	16792	46.6444	1	0.192972	0.169673
GOTERM_BP_DIRECT	GO:0070849~response to epidermal growth factor	2	1.11111	0.0419661	MAPK1, MAPK3	180	4	16792	46.6444	1	0.192972	0.169673
GOTERM_BP_DIRECT	GO:0090170~regulation of Golgi inheritance	2	1.11111	0.0419661	MAPK1, MAPK3	180	4	16792	46.6444	1	0.192972	0.169673
GOTERM_BP_DIRECT	GO:0060355~positive regulation of cell adhesion molecule production	2	1.11111	0.0419661	IL1B, CAV1	180	4	16792	46.6444	1	0.192972	0.169673
GOTERM_BP_DIRECT	GO:0014042~positive regulation of neuron maturation	2	1.11111	0.0419661	BCL2, MTOR	180	4	16792	46.6444	1	0.192972	0.169673
GOTERM_BP_DIRECT	GO:0061419~positive regulation of transcription from RNA polymerase II promoter in response to hypoxia	2	1.11111	0.0419661	HIF1A, VEGFA	180	4	16792	46.6444	1	0.192972	0.169673
GOTERM_BP_DIRECT	GO:0045191~regulation of isotype switching	2	1.11111	0.0419661	IL10, IL4	180	4	16792	46.6444	1	0.192972	0.169673
GOTERM_BP_DIRECT	GO:0042159~lipoprotein catabolic process	2	1.11111	0.0419661	APOE, APOB	180	4	16792	46.6444	1	0.192972	0.169673
GOTERM_BP_DIRECT	GO:0032507~maintenance of protein location in cell	2	1.11111	0.0419661	CD4, CAV1	180	4	16792	46.6444	1	0.192972	0.169673
GOTERM_BP_DIRECT	GO:1900127~positive regulation of hyaluronan biosynthetic process	2	1.11111	0.0419661	EGF, PDGFB	180	4	16792	46.6444	1	0.192972	0.169673
GOTERM_BP_DIRECT	GO:0034137~positive regulation of toll-like receptor 2 signaling pathway	2	1.11111	0.0419661	CYBA, HMGB1	180	4	16792	46.6444	1	0.192972	0.169673
GOTERM_BP_DIRECT	GO:0033158~regulation of protein import into nucleus, translocation	2	1.11111	0.0419661	TXN, SIRT1	180	4	16792	46.6444	1	0.192972	0.169673
GOTERM_BP_DIRECT	GO:0002248~connective tissue replacement involved in inflammatory response wound healing	2	1.11111	0.0419661	IL1A, HIF1A	180	4	16792	46.6444	1	0.192972	0.169673
GOTERM_BP_DIRECT	GO:1903347~negative regulation of bicellular tight junction assembly	2	1.11111	0.0419661	IKBKB, TNF	180	4	16792	46.6444	1	0.192972	0.169673
GOTERM_BP_DIRECT	GO:0010155~regulation of proton transport	2	1.11111	0.0419661	IL4, IL13	180	4	16792	46.6444	1	0.192972	0.169673
GOTERM_BP_DIRECT	GO:0032269~negative regulation of cellular protein metabolic process	2	1.11111	0.0419661	EDN1, MIF	180	4	16792	46.6444	1	0.192972	0.169673
GOTERM_BP_DIRECT	GO:0006778~porphyrin-containing compound metabolic process	2	1.11111	0.0419661	CYP1A2, CYP1A1	180	4	16792	46.6444	1	0.192972	0.169673
GOTERM_BP_DIRECT	GO:0035655~interleukin-18-mediated signaling pathway	2	1.11111	0.0419661	PDGFB, AKT1	180	4	16792	46.6444	1	0.192972	0.169673
GOTERM_CC_DIRECT	GO:0005604~basement membrane	4	2.22222	0.0428217	ACAN, COL4A1, RPSA, TIMP1	180	79	18224	5.1263	0.999998	0.20582	0.171977
GOTERM_BP_DIRECT	GO:0071479~cellular response to ionizing radiation	3	1.66667	0.0429323	MAPK14, SIRT1, TP53	180	31	16792	9.02796	1	0.195946	0.172288
GOTERM_BP_DIRECT	GO:0071392~cellular response to estradiol stimulus	3	1.66667	0.0429323	IL10, IL6, EGFR	180	31	16792	9.02796	1	0.195946	0.172288
GOTERM_BP_DIRECT	GO:0045765~regulation of angiogenesis	3	1.66667	0.0429323	IL6, LEP, HMOX1	180	31	16792	9.02796	1	0.195946	0.172288
GOTERM_BP_DIRECT	GO:1990090~cellular response to nerve growth factor stimulus	3	1.66667	0.0429323	APP, CREB1, AKT1	180	31	16792	9.02796	1	0.195946	0.172288
GOTERM_BP_DIRECT	GO:0045444~fat cell differentiation	4	2.22222	0.0430537	SOCS1, GPX1, RETN, FOXO1	180	73	16792	5.11172	1	0.195946	0.172288
GOTERM_BP_DIRECT	GO:0009791~post-embryonic development	4	2.22222	0.0430537	CYP1A2, BCL2, APOB, MTOR	180	73	16792	5.11172	1	0.195946	0.172288
GOTERM_BP_DIRECT	GO:0051726~regulation of cell cycle	5	2.77778	0.0437464	JUN, LEP, STAT3, BAK1, BIRC2	180	124	16792	3.76165	1	0.198759	0.174762
GOTERM_BP_DIRECT	GO:0003007~heart morphogenesis	3	1.66667	0.0454807	INSR, MTOR, VEGFA	180	32	16792	8.74583	1	0.205588	0.180766
GOTERM_BP_DIRECT	GO:0042100~B cell proliferation	3	1.66667	0.0454807	IL10, BCL2, HSPD1	180	32	16792	8.74583	1	0.205588	0.180766
GOTERM_BP_DIRECT	GO:0042177~negative regulation of protein catabolic process	3	1.66667	0.0454807	NOS2, RELA, EGFR	180	32	16792	8.74583	1	0.205588	0.180766
GOTERM_MF_DIRECT	GO:0016887~ATPase activity	6	3.33333	0.045596	ABCA1, PTPA, HSP90AA1, ABCC1, HSPA1B, HSPD1	180	183	16881	3.07486	1	0.271572	0.240005
GOTERM_BP_DIRECT	GO:0038096~Fc-gamma receptor signaling pathway involved in phagocytosis	5	2.77778	0.0470461	HSP90AA1, PRKCE, MAPK1, RAC1, MAPK3	180	127	16792	3.67279	1	0.212305	0.186672
GOTERM_BP_DIRECT	GO:0010634~positive regulation of epithelial cell migration	3	1.66667	0.0480834	JUN, PRKCE, HIF1A	180	33	16792	8.48081	1	0.216619	0.190466
GOTERM_CC_DIRECT	GO:0033256~I-kappaB/NF-kappaB complex	2	1.11111	0.0481609	NFKBIA, RELA	180	5	18224	40.4978	1	0.227809	0.19035
GOTERM_CC_DIRECT	GO:0043231~intracellular membrane-bounded organelle	11	6.11111	0.0491321	APP, CASP7, G6PD, INSR, PON1, CYP1A2, CAT, CYP1A1, GZMB, PPARG, APOB	180	558	18224	1.99586	1	0.228771	0.191155
GOTERM_BP_DIRECT	GO:0006898~receptor-mediated endocytosis	6	3.33333	0.0492061	HSP90AA1, CFI, APOA1, APOE, APOB, EGFR	180	186	16792	3.00932	1	0.221303	0.194584
GOTERM_MF_DIRECT	GO:0051219~phosphoprotein binding	3	1.66667	0.0502639	TBK1, PLAT, MTOR	180	34	16881	8.275	1	0.290063	0.256347
GOTERM_BP_DIRECT	GO:0001837~epithelial to mesenchymal transition	3	1.66667	0.0507392	HGF, WNT5A, HIF1A	180	34	16792	8.23137	1	0.223024	0.196097
GOTERM_CC_DIRECT	GO:0043202~lysosomal lumen	4	2.22222	0.0512854	PDGFRB, ACAN, HSP90AA1, SMPD1	180	85	18224	4.76444	1	0.231562	0.193486
GOTERM_CC_DIRECT	GO:0042383~sarcolemma	4	2.22222	0.0512854	DES, LAMP1, NOS1, AQP1	180	85	18224	4.76444	1	0.231562	0.193486
GOTERM_MF_DIRECT	GO:0032451~demethylase activity	2	1.11111	0.0519117	CYP1A2, CYP1A1	180	5	16881	37.5133	1	0.290063	0.256347
GOTERM_MF_DIRECT	GO:0001875~lipopolysaccharide receptor activity	2	1.11111	0.0519117	TLR4, TLR2	180	5	16881	37.5133	1	0.290063	0.256347
GOTERM_MF_DIRECT	GO:0004784~superoxide dismutase activity	2	1.11111	0.0519117	SOD3, SOD1	180	5	16881	37.5133	1	0.290063	0.256347
GOTERM_MF_DIRECT	GO:1990254~keratin filament binding	2	1.11111	0.0519117	VIM, SIRT1	180	5	16881	37.5133	1	0.290063	0.256347
GOTERM_MF_DIRECT	GO:0051525~NFAT protein binding	2	1.11111	0.0519117	MAPK14, PPARA	180	5	16881	37.5133	1	0.290063	0.256347
GOTERM_BP_DIRECT	GO:0002821~positive regulation of adaptive immune response	2	1.11111	0.052181	IL6ST, SIRT1	180	5	16792	37.3156	1	0.223024	0.196097
GOTERM_BP_DIRECT	GO:0090370~negative regulation of cholesterol efflux	2	1.11111	0.052181	EGF, APOE	180	5	16792	37.3156	1	0.223024	0.196097
GOTERM_BP_DIRECT	GO:0070242~thymocyte apoptotic process	2	1.11111	0.052181	BAX, BAK1	180	5	16792	37.3156	1	0.223024	0.196097
GOTERM_BP_DIRECT	GO:0038033~positive regulation of endothelial cell chemotaxis by VEGF-activated vascular endothelial growth factor receptor signaling pathway	2	1.11111	0.052181	HSPB1, VEGFA	180	5	16792	37.3156	1	0.223024	0.196097
GOTERM_BP_DIRECT	GO:0048639~positive regulation of developmental growth	2	1.11111	0.052181	LEP, INSR	180	5	16792	37.3156	1	0.223024	0.196097
GOTERM_BP_DIRECT	GO:0033591~response to L-ascorbic acid	2	1.11111	0.052181	GSTP1, CAT	180	5	16792	37.3156	1	0.223024	0.196097
GOTERM_BP_DIRECT	GO:0070431~nucleotide-binding oligomerization domain containing 2 signaling pathway	2	1.11111	0.052181	NFKBIA, RELA	180	5	16792	37.3156	1	0.223024	0.196097
GOTERM_BP_DIRECT	GO:0045541~negative regulation of cholesterol biosynthetic process	2	1.11111	0.052181	APOE, SOD1	180	5	16792	37.3156	1	0.223024	0.196097
GOTERM_BP_DIRECT	GO:0034392~negative regulation of smooth muscle cell apoptotic process	2	1.11111	0.052181	EDN1, IGF1	180	5	16792	37.3156	1	0.223024	0.196097
GOTERM_BP_DIRECT	GO:2000757~negative regulation of peptidyl-lysine acetylation	2	1.11111	0.052181	SIRT1, SIRT3	180	5	16792	37.3156	1	0.223024	0.196097
GOTERM_BP_DIRECT	GO:0060509~Type I pneumocyte differentiation	2	1.11111	0.052181	CREB1, THRA	180	5	16792	37.3156	1	0.223024	0.196097
GOTERM_BP_DIRECT	GO:1900103~positive regulation of endoplasmic reticulum unfolded protein response	2	1.11111	0.052181	BAX, BAK1	180	5	16792	37.3156	1	0.223024	0.196097
GOTERM_BP_DIRECT	GO:0030300~regulation of intestinal cholesterol absorption	2	1.11111	0.052181	LEP, APOA1	180	5	16792	37.3156	1	0.223024	0.196097
GOTERM_BP_DIRECT	GO:0050996~positive regulation of lipid catabolic process	2	1.11111	0.052181	IL1B, PRKCE	180	5	16792	37.3156	1	0.223024	0.196097
GOTERM_BP_DIRECT	GO:0071504~cellular response to heparin	2	1.11111	0.052181	EGR1, AOC1	180	5	16792	37.3156	1	0.223024	0.196097
GOTERM_BP_DIRECT	GO:0046813~receptor-mediated virion attachment to host cell	2	1.11111	0.052181	CD81, ICAM1	180	5	16792	37.3156	1	0.223024	0.196097
GOTERM_BP_DIRECT	GO:0000303~response to superoxide	2	1.11111	0.052181	UCP2, SOD1	180	5	16792	37.3156	1	0.223024	0.196097
GOTERM_BP_DIRECT	GO:1904417~positive regulation of xenophagy	2	1.11111	0.052181	TBK1, MAPK3	180	5	16792	37.3156	1	0.223024	0.196097
GOTERM_BP_DIRECT	GO:1902262~apoptotic process involved in patterning of blood vessels	2	1.11111	0.052181	BAX, BAK1	180	5	16792	37.3156	1	0.223024	0.196097
GOTERM_BP_DIRECT	GO:2000343~positive regulation of chemokine (C-X-C motif) ligand 2 production	2	1.11111	0.052181	MIF, TNF	180	5	16792	37.3156	1	0.223024	0.196097
GOTERM_BP_DIRECT	GO:0070257~positive regulation of mucus secretion	2	1.11111	0.052181	PRKCE, CYBA	180	5	16792	37.3156	1	0.223024	0.196097
GOTERM_BP_DIRECT	GO:0003100~regulation of systemic arterial blood pressure by endothelin	2	1.11111	0.052181	EDN1, NOS3	180	5	16792	37.3156	1	0.223024	0.196097
GOTERM_BP_DIRECT	GO:2000535~regulation of entry of bacterium into host cell	2	1.11111	0.052181	CXCL8, CAV1	180	5	16792	37.3156	1	0.223024	0.196097
GOTERM_BP_DIRECT	GO:0010891~negative regulation of sequestering of triglyceride	2	1.11111	0.052181	PPARG, PPARA	180	5	16792	37.3156	1	0.223024	0.196097
GOTERM_BP_DIRECT	GO:0042092~type 2 immune response	2	1.11111	0.052181	IL10, IL4	180	5	16792	37.3156	1	0.223024	0.196097
GOTERM_BP_DIRECT	GO:0035630~bone mineralization involved in bone maturation	2	1.11111	0.052181	LEP, IGF1	180	5	16792	37.3156	1	0.223024	0.196097
GOTERM_BP_DIRECT	GO:0033599~regulation of mammary gland epithelial cell proliferation	2	1.11111	0.052181	GPX1, BAX	180	5	16792	37.3156	1	0.223024	0.196097
GOTERM_BP_DIRECT	GO:1904385~cellular response to angiotensin	2	1.11111	0.052181	MYC, CYBA	180	5	16792	37.3156	1	0.223024	0.196097
GOTERM_BP_DIRECT	GO:0072540~T-helper 17 cell lineage commitment	2	1.11111	0.052181	IL6, IRF4	180	5	16792	37.3156	1	0.223024	0.196097
GOTERM_BP_DIRECT	GO:0035509~negative regulation of myosin-light-chain-phosphatase activity	2	1.11111	0.052181	IKBKB, TNF	180	5	16792	37.3156	1	0.223024	0.196097
GOTERM_MF_DIRECT	GO:0070491~repressing transcription factor binding	3	1.66667	0.0529478	MYC, HMGB1, RELA	180	35	16881	8.03857	1	0.292834	0.258796
GOTERM_BP_DIRECT	GO:0072593~reactive oxygen species metabolic process	3	1.66667	0.0534465	PDGFB, BCL2, SOD1	180	35	16792	7.99619	1	0.228067	0.200531
GOTERM_BP_DIRECT	GO:0007611~learning or memory	3	1.66667	0.056204	THRA, CASP3, EGFR	180	36	16792	7.77407	1	0.238688	0.20987
GOTERM_BP_DIRECT	GO:0050714~positive regulation of protein secretion	3	1.66667	0.056204	IL1A, IL13, IGF1	180	36	16792	7.77407	1	0.238688	0.20987
GOTERM_BP_DIRECT	GO:0048469~cell maturation	3	1.66667	0.056204	IL15, PPARG, VEGFA	180	36	16792	7.77407	1	0.238688	0.20987
GOTERM_CC_DIRECT	GO:0046696~lipopolysaccharide receptor complex	2	1.11111	0.0575126	TLR4, HSPD1	180	6	18224	33.7481	1	0.252041	0.210598
GOTERM_CC_DIRECT	GO:0031265~CD95 death-inducing signaling complex	2	1.11111	0.0575126	CASP8, FAS	180	6	18224	33.7481	1	0.252041	0.210598
GOTERM_MF_DIRECT	GO:0004714~transmembrane receptor protein tyrosine kinase activity	3	1.66667	0.0612934	FLT1, INSR, EGFR	180	38	16881	7.40395	1	0.319872	0.282691
GOTERM_MF_DIRECT	GO:0001102~RNA polymerase II activating transcription factor binding	3	1.66667	0.0612934	JUN, CREB1, NFE2L2	180	38	16881	7.40395	1	0.319872	0.282691
GOTERM_CC_DIRECT	GO:0030669~clathrin-coated endocytic vesicle membrane	3	1.66667	0.0612969	WNT5A, TYRP1, APOB	180	41	18224	7.40813	1	0.264731	0.221202
GOTERM_MF_DIRECT	GO:0008131~primary amine oxidase activity	2	1.11111	0.0619679	AOC3, AOC1	180	6	16881	31.2611	1	0.319872	0.282691
GOTERM_MF_DIRECT	GO:0070324~thyroid hormone binding	2	1.11111	0.0619679	TTR, THRA	180	6	16881	31.2611	1	0.319872	0.282691
GOTERM_MF_DIRECT	GO:1990782~protein tyrosine kinase binding	2	1.11111	0.0619679	CD4, HSP90AA1	180	6	16881	31.2611	1	0.319872	0.282691
GOTERM_MF_DIRECT	GO:0046870~cadmium ion binding	2	1.11111	0.0619679	NOS3, NOS1	180	6	16881	31.2611	1	0.319872	0.282691
GOTERM_MF_DIRECT	GO:0060228~phosphatidylcholine-sterol O-acyltransferase activator activity	2	1.11111	0.0619679	APOA1, APOE	180	6	16881	31.2611	1	0.319872	0.282691
GOTERM_BP_DIRECT	GO:0070245~positive regulation of thymocyte apoptotic process	2	1.11111	0.0622876	WNT5A, TP53	180	6	16792	31.0963	1	0.255178	0.224369
GOTERM_BP_DIRECT	GO:0046321~positive regulation of fatty acid oxidation	2	1.11111	0.0622876	PPARG, PPARA	180	6	16792	31.0963	1	0.255178	0.224369
GOTERM_BP_DIRECT	GO:0043619~regulation of transcription from RNA polymerase II promoter in response to oxidative stress	2	1.11111	0.0622876	HMOX1, HIF1A	180	6	16792	31.0963	1	0.255178	0.224369
GOTERM_BP_DIRECT	GO:0034134~toll-like receptor 2 signaling pathway	2	1.11111	0.0622876	IRAK1, TLR2	180	6	16792	31.0963	1	0.255178	0.224369
GOTERM_BP_DIRECT	GO:0071280~cellular response to copper ion	2	1.11111	0.0622876	AOC1, AQP1	180	6	16792	31.0963	1	0.255178	0.224369
GOTERM_BP_DIRECT	GO:0060440~trachea formation	2	1.11111	0.0622876	MAPK1, MAPK3	180	6	16792	31.0963	1	0.255178	0.224369
GOTERM_BP_DIRECT	GO:0072655~establishment of protein localization to mitochondrion	2	1.11111	0.0622876	DDIT3, AKT1	180	6	16792	31.0963	1	0.255178	0.224369
GOTERM_BP_DIRECT	GO:0045639~positive regulation of myeloid cell differentiation	2	1.11111	0.0622876	LEP, HMGB1	180	6	16792	31.0963	1	0.255178	0.224369
GOTERM_BP_DIRECT	GO:0038084~vascular endothelial growth factor signaling pathway	2	1.11111	0.0622876	FLT1, VEGFA	180	6	16792	31.0963	1	0.255178	0.224369
GOTERM_BP_DIRECT	GO:0032025~response to cobalt ion	2	1.11111	0.0622876	CASP8, CASP3	180	6	16792	31.0963	1	0.255178	0.224369
GOTERM_BP_DIRECT	GO:0090336~positive regulation of brown fat cell differentiation	2	1.11111	0.0622876	MAPK14, PTGS2	180	6	16792	31.0963	1	0.255178	0.224369
GOTERM_BP_DIRECT	GO:0043615~astrocyte cell migration	2	1.11111	0.0622876	MMP14, CCL2	180	6	16792	31.0963	1	0.255178	0.224369
GOTERM_BP_DIRECT	GO:0007253~cytoplasmic sequestering of NF-kappaB	2	1.11111	0.0622876	IL10, NFKBIA	180	6	16792	31.0963	1	0.255178	0.224369
GOTERM_BP_DIRECT	GO:0051346~negative regulation of hydrolase activity	2	1.11111	0.0622876	NOS3, NOS1	180	6	16792	31.0963	1	0.255178	0.224369
GOTERM_BP_DIRECT	GO:2001171~positive regulation of ATP biosynthetic process	2	1.11111	0.0622876	MYC, STAT3	180	6	16792	31.0963	1	0.255178	0.224369
GOTERM_BP_DIRECT	GO:0045084~positive regulation of interleukin-12 biosynthetic process	2	1.11111	0.0622876	TLR4, RELA	180	6	16792	31.0963	1	0.255178	0.224369
GOTERM_BP_DIRECT	GO:0033033~negative regulation of myeloid cell apoptotic process	2	1.11111	0.0622876	BCL2, MIF	180	6	16792	31.0963	1	0.255178	0.224369
GOTERM_BP_DIRECT	GO:0097527~necroptotic signaling pathway	2	1.11111	0.0622876	FAS, TNF	180	6	16792	31.0963	1	0.255178	0.224369
GOTERM_BP_DIRECT	GO:0034384~high-density lipoprotein particle clearance	2	1.11111	0.0622876	APOA1, APOE	180	6	16792	31.0963	1	0.255178	0.224369
GOTERM_BP_DIRECT	GO:1903428~positive regulation of reactive oxygen species biosynthetic process	2	1.11111	0.0622876	IL4, CYBA	180	6	16792	31.0963	1	0.255178	0.224369
GOTERM_BP_DIRECT	GO:0034105~positive regulation of tissue remodeling	2	1.11111	0.0622876	IL15, IL2	180	6	16792	31.0963	1	0.255178	0.224369
GOTERM_BP_DIRECT	GO:0010742~macrophage derived foam cell differentiation	2	1.11111	0.0622876	STAT1, PPARG	180	6	16792	31.0963	1	0.255178	0.224369
GOTERM_BP_DIRECT	GO:0060664~epithelial cell proliferation involved in salivary gland morphogenesis	2	1.11111	0.0622876	IL6, TNF	180	6	16792	31.0963	1	0.255178	0.224369
GOTERM_CC_DIRECT	GO:0009898~cytoplasmic side of plasma membrane	3	1.66667	0.0639579	IKBKB, G6PD, BIRC2	180	42	18224	7.23175	1	0.272191	0.227435
GOTERM_BP_DIRECT	GO:0001822~kidney development	4	2.22222	0.0641945	ODC1, BAX, AGT, VEGFA	180	86	16792	4.33902	1	0.262279	0.230613
GOTERM_BP_DIRECT	GO:0007050~cell cycle arrest	5	2.77778	0.0642176	CXCL8, MYC, DDIT3, TP53, MTOR	180	141	16792	3.30812	1	0.262279	0.230613
GOTERM_CC_DIRECT	GO:0005783~endoplasmic reticulum	14	7.77778	0.0648509	AOC3, PRKCE, CAV1, ATP2A2, PRKCA, PTGS2, PROC, CAT, BCL2, BAX, HMOX1, BAK1, APOE, TP53	180	828	18224	1.71186	1	0.272191	0.227435
GOTERM_BP_DIRECT	GO:0007190~activation of adenylate cyclase activity	3	1.66667	0.067709	EDNRA, PRKCA, RAF1	180	40	16792	6.99667	1	0.275695	0.242409
GOTERM_BP_DIRECT	GO:0009566~fertilization	3	1.66667	0.067709	BAX, APOB, BCL2L1	180	40	16792	6.99667	1	0.275695	0.242409
GOTERM_BP_DIRECT	GO:0042742~defense response to bacterium	5	2.77778	0.0697033	IL10, NOS2, TLR4, ELANE, TNFRSF1A	180	145	16792	3.21686	1	0.283382	0.249168
GOTERM_BP_DIRECT	GO:0030163~protein catabolic process	3	1.66667	0.0706975	AKT1, ELANE, MTOR	180	41	16792	6.82602	1	0.286463	0.251877
GOTERM_CC_DIRECT	GO:0005635~nuclear envelope	5	2.77778	0.0718048	PARP1, CYBB, BAX, SIRT1, MAPK3	180	159	18224	3.18379	1	0.290818	0.242999
GOTERM_MF_DIRECT	GO:0005138~interleukin-6 receptor binding	2	1.11111	0.0719179	IL6, IL6ST	180	7	16881	26.7952	1	0.367731	0.324988
GOTERM_CC_DIRECT	GO:0016605~PML body	4	2.22222	0.0721412	TERT, SIRT1, TP53, MTOR	180	98	18224	4.13243	1	0.290818	0.242999
GOTERM_CC_DIRECT	GO:0005764~lysosome	6	3.33333	0.0722166	LAMP1, SMPD1, IL1B, CAT, MTOR, SOD1	180	226	18224	2.68791	1	0.290818	0.242999
GOTERM_BP_DIRECT	GO:0032308~positive regulation of prostaglandin secretion	2	1.11111	0.072287	EDN1, IL1B	180	7	16792	26.654	1	0.286463	0.251877
GOTERM_BP_DIRECT	GO:0045359~positive regulation of interferon-beta biosynthetic process	2	1.11111	0.072287	TBK1, TLR4	180	7	16792	26.654	1	0.286463	0.251877
GOTERM_BP_DIRECT	GO:0045822~negative regulation of heart contraction	2	1.11111	0.072287	ATP2A2, IL2	180	7	16792	26.654	1	0.286463	0.251877
GOTERM_BP_DIRECT	GO:0034351~negative regulation of glial cell apoptotic process	2	1.11111	0.072287	CCL2, PRKCA	180	7	16792	26.654	1	0.286463	0.251877
GOTERM_BP_DIRECT	GO:0060907~positive regulation of macrophage cytokine production	2	1.11111	0.072287	WNT5A, TLR4	180	7	16792	26.654	1	0.286463	0.251877
GOTERM_BP_DIRECT	GO:0048806~genitalia development	2	1.11111	0.072287	DNAJC19, WNT5A	180	7	16792	26.654	1	0.286463	0.251877
GOTERM_BP_DIRECT	GO:0032287~peripheral nervous system myelin maintenance	2	1.11111	0.072287	AKT1, SOD1	180	7	16792	26.654	1	0.286463	0.251877
GOTERM_BP_DIRECT	GO:0070417~cellular response to cold	2	1.11111	0.072287	NFKBIA, FOXO1	180	7	16792	26.654	1	0.286463	0.251877
GOTERM_BP_DIRECT	GO:0010870~positive regulation of receptor biosynthetic process	2	1.11111	0.072287	EDN1, HIF1A	180	7	16792	26.654	1	0.286463	0.251877
GOTERM_BP_DIRECT	GO:0071312~cellular response to alkaloid	2	1.11111	0.072287	BCL2L1, ICAM1	180	7	16792	26.654	1	0.286463	0.251877
GOTERM_BP_DIRECT	GO:0061298~retina vasculature development in camera-type eye	2	1.11111	0.072287	PDGFRB, HIF1A	180	7	16792	26.654	1	0.286463	0.251877
GOTERM_BP_DIRECT	GO:0001783~B cell apoptotic process	2	1.11111	0.072287	BAX, BAK1	180	7	16792	26.654	1	0.286463	0.251877
GOTERM_BP_DIRECT	GO:0045722~positive regulation of gluconeogenesis	2	1.11111	0.072287	PPARA, FOXO1	180	7	16792	26.654	1	0.286463	0.251877
GOTERM_BP_DIRECT	GO:0071639~positive regulation of monocyte chemotactic protein-1 production	2	1.11111	0.072287	IL1A, IL1B	180	7	16792	26.654	1	0.286463	0.251877
GOTERM_BP_DIRECT	GO:0090050~positive regulation of cell migration involved in sprouting angiogenesis	2	1.11111	0.072287	PTGS2, VEGFA	180	7	16792	26.654	1	0.286463	0.251877
GOTERM_BP_DIRECT	GO:0034983~peptidyl-lysine deacetylation	2	1.11111	0.072287	SIRT1, SIRT3	180	7	16792	26.654	1	0.286463	0.251877
GOTERM_BP_DIRECT	GO:0051496~positive regulation of stress fiber assembly	3	1.66667	0.0737283	APOA1, RAC1, MTOR	180	42	16792	6.66349	1	0.290448	0.255381
GOTERM_BP_DIRECT	GO:0009725~response to hormone	3	1.66667	0.0737283	MMP14, TIMP2, TIMP1	180	42	16792	6.66349	1	0.290448	0.255381
GOTERM_BP_DIRECT	GO:0090002~establishment of protein localization to plasma membrane	3	1.66667	0.0737283	IKBKB, TNF, TNFRSF1A	180	42	16792	6.66349	1	0.290448	0.255381
GOTERM_BP_DIRECT	GO:0009411~response to UV	3	1.66667	0.0737283	CASP7, MAPK8, ELANE	180	42	16792	6.66349	1	0.290448	0.255381
GOTERM_BP_DIRECT	GO:0050852~T cell receptor signaling pathway	5	2.77778	0.0739346	NFKBIA, IKBKB, CD4, MAPK1, RELA	180	148	16792	3.15165	1	0.290831	0.255718
GOTERM_CC_DIRECT	GO:0005856~cytoskeleton	8	4.44444	0.0739655	CASP8, NOS3, PRKCE, HSPB1, MAPK1, VIM, NOS1, MAPK3	180	371	18224	2.18317	1	0.29389	0.245565
GOTERM_CC_DIRECT	GO:0005782~peroxisomal matrix	3	1.66667	0.0749756	POMC, CAT, HSPD1	180	46	18224	6.6029	1	0.293909	0.245582
GOTERM_CC_DIRECT	GO:0034366~spherical high-density lipoprotein particle	2	1.11111	0.0759429	PON1, APOA1	180	8	18224	25.3111	1	0.293909	0.245582
GOTERM_MF_DIRECT	GO:0008289~lipid binding	5	2.77778	0.0761147	BAX, APOA1, APOE, PPARA, PTGS2	180	151	16881	3.10541	1	0.385553	0.340738
GOTERM_BP_DIRECT	GO:0045785~positive regulation of cell adhesion	3	1.66667	0.0768002	PRKCA, TNF, VEGFA	180	43	16792	6.50853	1	0.301215	0.264848
GOTERM_BP_DIRECT	GO:0031623~receptor internalization	3	1.66667	0.0768002	CXCL8, CD81, CAV1	180	43	16792	6.50853	1	0.301215	0.264848
GOTERM_BP_DIRECT	GO:0046854~phosphatidylinositol phosphorylation	4	2.22222	0.079164	PDGFRB, EGF, PDGFB, EGFR	180	94	16792	3.96974	1	0.306968	0.269906
GOTERM_BP_DIRECT	GO:0006367~transcription initiation from RNA polymerase II promoter	5	2.77778	0.0797712	THRA, NR1I2, PPARG, PPARA, NR3C1	180	152	16792	3.06871	1	0.306968	0.269906
GOTERM_BP_DIRECT	GO:0043434~response to peptide hormone	3	1.66667	0.079912	STAT1, ATP2A2, TIMP1	180	44	16792	6.36061	1	0.306968	0.269906
GOTERM_MF_DIRECT	GO:0001228~transcriptional activator activity, RNA polymerase II transcription regulatory region sequence-specific binding	4	2.22222	0.0801498	STAT3, NR1I2, HIF1A, TP53	180	95	16881	3.94877	1	0.398351	0.352049
GOTERM_MF_DIRECT	GO:0004872~receptor activity	6	3.33333	0.0815803	CD4, AOC1, FAS, TLR4, ICAM1, TLR2	180	217	16881	2.59309	1	0.398351	0.352049
GOTERM_MF_DIRECT	GO:0004887~thyroid hormone receptor activity	2	1.11111	0.0817631	THRA, NR1I2	180	8	16881	23.4458	1	0.398351	0.352049
GOTERM_MF_DIRECT	GO:0031730~CCR5 chemokine receptor binding	2	1.11111	0.0817631	STAT1, STAT3	180	8	16881	23.4458	1	0.398351	0.352049
GOTERM_BP_DIRECT	GO:0019064~fusion of virus membrane with host plasma membrane	2	1.11111	0.0821804	CD4, CCR5	180	8	16792	23.3222	1	0.306968	0.269906
GOTERM_BP_DIRECT	GO:0034383~low-density lipoprotein particle clearance	2	1.11111	0.0821804	HMOX1, APOB	180	8	16792	23.3222	1	0.306968	0.269906
GOTERM_BP_DIRECT	GO:0061049~cell growth involved in cardiac muscle cell development	2	1.11111	0.0821804	PDLIM5, AGT	180	8	16792	23.3222	1	0.306968	0.269906
GOTERM_BP_DIRECT	GO:0031666~positive regulation of lipopolysaccharide-mediated signaling pathway	2	1.11111	0.0821804	PRKCA, MIF	180	8	16792	23.3222	1	0.306968	0.269906
GOTERM_BP_DIRECT	GO:0005979~regulation of glycogen biosynthetic process	2	1.11111	0.0821804	AKT1, MTOR	180	8	16792	23.3222	1	0.306968	0.269906
GOTERM_BP_DIRECT	GO:0014909~smooth muscle cell migration	2	1.11111	0.0821804	PLAU, PLAT	180	8	16792	23.3222	1	0.306968	0.269906
GOTERM_BP_DIRECT	GO:0032471~negative regulation of endoplasmic reticulum calcium ion concentration	2	1.11111	0.0821804	BAX, BAK1	180	8	16792	23.3222	1	0.306968	0.269906
GOTERM_BP_DIRECT	GO:0031497~chromatin assembly	2	1.11111	0.0821804	HMGB1, TP53	180	8	16792	23.3222	1	0.306968	0.269906
GOTERM_BP_DIRECT	GO:0050702~interleukin-1 beta secretion	2	1.11111	0.0821804	ABCA1, TLR4	180	8	16792	23.3222	1	0.306968	0.269906
GOTERM_BP_DIRECT	GO:0048304~positive regulation of isotype switching to IgG isotypes	2	1.11111	0.0821804	IL4, IL2	180	8	16792	23.3222	1	0.306968	0.269906
GOTERM_BP_DIRECT	GO:0090037~positive regulation of protein kinase C signaling	2	1.11111	0.0821804	WNT5A, VEGFA	180	8	16792	23.3222	1	0.306968	0.269906
GOTERM_BP_DIRECT	GO:0097011~cellular response to granulocyte macrophage colony-stimulating factor stimulus	2	1.11111	0.0821804	MAPK1, AKT1	180	8	16792	23.3222	1	0.306968	0.269906
GOTERM_BP_DIRECT	GO:0014732~skeletal muscle atrophy	2	1.11111	0.0821804	RPS6KB1, IL15	180	8	16792	23.3222	1	0.306968	0.269906
GOTERM_BP_DIRECT	GO:2000650~negative regulation of sodium ion transmembrane transporter activity	2	1.11111	0.0821804	PRKCE, AGT	180	8	16792	23.3222	1	0.306968	0.269906
GOTERM_BP_DIRECT	GO:0031102~neuron projection regeneration	2	1.11111	0.0821804	APOA1, APOE	180	8	16792	23.3222	1	0.306968	0.269906
GOTERM_BP_DIRECT	GO:1903896~positive regulation of IRE1-mediated unfolded protein response	2	1.11111	0.0821804	BAX, BAK1	180	8	16792	23.3222	1	0.306968	0.269906
GOTERM_BP_DIRECT	GO:0071316~cellular response to nicotine	2	1.11111	0.0821804	TNF, RELA	180	8	16792	23.3222	1	0.306968	0.269906
GOTERM_BP_DIRECT	GO:0032966~negative regulation of collagen biosynthetic process	2	1.11111	0.0821804	IL6, PPARG	180	8	16792	23.3222	1	0.306968	0.269906
GOTERM_BP_DIRECT	GO:0098909~regulation of cardiac muscle cell action potential involved in regulation of contraction	2	1.11111	0.0821804	CAV1, ATP2A2	180	8	16792	23.3222	1	0.306968	0.269906
GOTERM_BP_DIRECT	GO:0033598~mammary gland epithelial cell proliferation	2	1.11111	0.0821804	TNFSF11, MAPK1	180	8	16792	23.3222	1	0.306968	0.269906
GOTERM_BP_DIRECT	GO:0034115~negative regulation of heterotypic cell-cell adhesion	2	1.11111	0.0821804	IL10, APOA1	180	8	16792	23.3222	1	0.306968	0.269906
GOTERM_BP_DIRECT	GO:0009812~flavonoid metabolic process	2	1.11111	0.0821804	MYC, CYP1A1	180	8	16792	23.3222	1	0.306968	0.269906
GOTERM_BP_DIRECT	GO:0046887~positive regulation of hormone secretion	2	1.11111	0.0821804	EDN1, CREB1	180	8	16792	23.3222	1	0.306968	0.269906
GOTERM_BP_DIRECT	GO:0032099~negative regulation of appetite	2	1.11111	0.0821804	LEP, PPARA	180	8	16792	23.3222	1	0.306968	0.269906
GOTERM_BP_DIRECT	GO:2000641~regulation of early endosome to late endosome transport	2	1.11111	0.0821804	MAPK1, MAPK3	180	8	16792	23.3222	1	0.306968	0.269906
GOTERM_BP_DIRECT	GO:0033129~positive regulation of histone phosphorylation	2	1.11111	0.0821804	IL1B, MAPK3	180	8	16792	23.3222	1	0.306968	0.269906
GOTERM_BP_DIRECT	GO:0031659~positive regulation of cyclin-dependent protein serine/threonine kinase activity involved in G1/S transition of mitotic cell cycle	2	1.11111	0.0821804	AKT1, EGFR	180	8	16792	23.3222	1	0.306968	0.269906
GOTERM_BP_DIRECT	GO:0002438~acute inflammatory response to antigenic stimulus	2	1.11111	0.0821804	ELANE, ICAM1	180	8	16792	23.3222	1	0.306968	0.269906
GOTERM_BP_DIRECT	GO:0010269~response to selenium ion	2	1.11111	0.0821804	GPX1, APOB	180	8	16792	23.3222	1	0.306968	0.269906
GOTERM_BP_DIRECT	GO:1903071~positive regulation of ER-associated ubiquitin-dependent protein catabolic process	2	1.11111	0.0821804	CAV1, NFE2L2	180	8	16792	23.3222	1	0.306968	0.269906
GOTERM_BP_DIRECT	GO:0006987~activation of signaling protein activity involved in unfolded protein response	2	1.11111	0.0821804	BAX, BAK1	180	8	16792	23.3222	1	0.306968	0.269906
GOTERM_MF_DIRECT	GO:0019902~phosphatase binding	3	1.66667	0.0823161	MAPK1, PPARA, MAPK3	180	45	16881	6.25222	1	0.398351	0.352049
GOTERM_BP_DIRECT	GO:0032870~cellular response to hormone stimulus	3	1.66667	0.0830626	JUN, RPS6KB1, STAT3	180	45	16792	6.21926	1	0.309627	0.272244
GOTERM_BP_DIRECT	GO:0007169~transmembrane receptor protein tyrosine kinase signaling pathway	4	2.22222	0.0831244	CD4, FLT1, INSR, EGFR	180	96	16792	3.88704	1	0.309627	0.272244
GOTERM_CC_DIRECT	GO:0031410~cytoplasmic vesicle	6	3.33333	0.0833442	PDGFRB, MMP14, SOCS1, CAV1, APOA1, SOD1	180	235	18224	2.58496	1	0.318418	0.26606
GOTERM_MF_DIRECT	GO:0004867~serine-type endopeptidase inhibitor activity	4	2.22222	0.08411	APP, SERPINE1, RECK, AGT	180	97	16881	3.86735	1	0.40343	0.356537
GOTERM_MF_DIRECT	GO:0005080~protein kinase C binding	3	1.66667	0.0854785	HSPB1, AKT1, PDLIM5	180	46	16881	6.1163	1	0.406398	0.35916
GOTERM_BP_DIRECT	GO:0003151~outflow tract morphogenesis	3	1.66667	0.0862506	JUN, HIF1A, VEGFA	180	46	16792	6.08406	1	0.320377	0.281696
GOTERM_BP_DIRECT	GO:0000186~activation of MAPKK activity	3	1.66667	0.0862506	EGF, RAF1, EGFR	180	46	16792	6.08406	1	0.320377	0.281696
GOTERM_BP_DIRECT	GO:0007399~nervous system development	7	3.88889	0.0869409	APP, SMPD1, STAT3, CXCL1, APOB, SDHA, VEGFA	180	287	16792	2.27534	1	0.322492	0.283556
GOTERM_BP_DIRECT	GO:0007229~integrin-mediated signaling pathway	4	2.22222	0.0892214	ITGAM, ITGA2B, APOA1, ITGAL	180	99	16792	3.76925	1	0.3296	0.289805
GOTERM_BP_DIRECT	GO:0006958~complement activation, classical pathway	4	2.22222	0.0892214	C1S, CFI, C4BPA, MASP2	180	99	16792	3.76925	1	0.3296	0.289805
GOTERM_BP_DIRECT	GO:0042110~T cell activation	3	1.66667	0.0894751	CASP8, IRF4, HSPD1	180	47	16792	5.95461	1	0.3296	0.289805
GOTERM_BP_DIRECT	GO:0045600~positive regulation of fat cell differentiation	3	1.66667	0.0894751	CREB1, AKT1, PPARG	180	47	16792	5.95461	1	0.3296	0.289805
GOTERM_BP_DIRECT	GO:0009267~cellular response to starvation	3	1.66667	0.0894751	CAV1, SIRT1, FOXO1	180	47	16792	5.95461	1	0.3296	0.289805
GOTERM_BP_DIRECT	GO:0007411~axon guidance	5	2.77778	0.0905274	CREB1, WNT5A, MAPK1, RAC1, MAPK3	180	159	16792	2.93361	1	0.329679	0.289875
GOTERM_BP_DIRECT	GO:0016310~phosphorylation	4	2.22222	0.0912945	STAT3, AKT1, MTOR, MAPK3	180	100	16792	3.73156	1	0.329679	0.289875
GOTERM_BP_DIRECT	GO:1990001~inhibition of cysteine-type endopeptidase activity involved in apoptotic process	2	1.11111	0.0919689	XIAP, BIRC2	180	9	16792	20.7309	1	0.329679	0.289875
GOTERM_BP_DIRECT	GO:0002281~macrophage activation involved in immune response	2	1.11111	0.0919689	PRKCE, HMGB1	180	9	16792	20.7309	1	0.329679	0.289875
GOTERM_BP_DIRECT	GO:1902894~negative regulation of pri-miRNA transcription from RNA polymerase II promoter	2	1.11111	0.0919689	PDGFB, PPARA	180	9	16792	20.7309	1	0.329679	0.289875
GOTERM_BP_DIRECT	GO:1903827~regulation of cellular protein localization	2	1.11111	0.0919689	PARP1, WNT5A	180	9	16792	20.7309	1	0.329679	0.289875
GOTERM_BP_DIRECT	GO:0097267~omega-hydroxylase P450 pathway	2	1.11111	0.0919689	CYP1A2, CYP1A1	180	9	16792	20.7309	1	0.329679	0.289875
GOTERM_BP_DIRECT	GO:0010224~response to UV-B	2	1.11111	0.0919689	BCL2, RELA	180	9	16792	20.7309	1	0.329679	0.289875
GOTERM_BP_DIRECT	GO:0055091~phospholipid homeostasis	2	1.11111	0.0919689	ABCA1, APOA1	180	9	16792	20.7309	1	0.329679	0.289875
GOTERM_BP_DIRECT	GO:2000304~positive regulation of ceramide biosynthetic process	2	1.11111	0.0919689	TNF, TNFRSF1A	180	9	16792	20.7309	1	0.329679	0.289875
GOTERM_BP_DIRECT	GO:0010469~regulation of receptor activity	2	1.11111	0.0919689	PLAU, SERPINE1	180	9	16792	20.7309	1	0.329679	0.289875
GOTERM_BP_DIRECT	GO:0035767~endothelial cell chemotaxis	2	1.11111	0.0919689	HMGB1, VEGFA	180	9	16792	20.7309	1	0.329679	0.289875
GOTERM_BP_DIRECT	GO:0060340~positive regulation of type I interferon-mediated signaling pathway	2	1.11111	0.0919689	IRF3, WNT5A	180	9	16792	20.7309	1	0.329679	0.289875
GOTERM_BP_DIRECT	GO:0044320~cellular response to leptin stimulus	2	1.11111	0.0919689	LEP, STAT3	180	9	16792	20.7309	1	0.329679	0.289875
GOTERM_BP_DIRECT	GO:0007494~midgut development	2	1.11111	0.0919689	WNT5A, EGFR	180	9	16792	20.7309	1	0.329679	0.289875
GOTERM_BP_DIRECT	GO:0071223~cellular response to lipoteichoic acid	2	1.11111	0.0919689	TLR4, TLR2	180	9	16792	20.7309	1	0.329679	0.289875
GOTERM_BP_DIRECT	GO:0010863~positive regulation of phospholipase C activity	2	1.11111	0.0919689	PDGFRB, FLT1	180	9	16792	20.7309	1	0.329679	0.289875
GOTERM_BP_DIRECT	GO:0042473~outer ear morphogenesis	2	1.11111	0.0919689	MAPK1, MAPK3	180	9	16792	20.7309	1	0.329679	0.289875
GOTERM_BP_DIRECT	GO:1900027~regulation of ruffle assembly	2	1.11111	0.0919689	CAV1, ICAM1	180	9	16792	20.7309	1	0.329679	0.289875
GOTERM_BP_DIRECT	GO:0048012~hepatocyte growth factor receptor signaling pathway	2	1.11111	0.0919689	HGF, MST1	180	9	16792	20.7309	1	0.329679	0.289875
GOTERM_BP_DIRECT	GO:0006909~phagocytosis	3	1.66667	0.0927349	LEP, ITGAL, ELANE	180	48	16792	5.83056	1	0.331978	0.291897
GOTERM_MF_DIRECT	GO:0008009~chemokine activity	3	1.66667	0.095179	CXCL8, CCL2, CXCL1	180	49	16881	5.74184	1	0.448583	0.396441
GOTERM_BP_DIRECT	GO:0007254~JNK cascade	3	1.66667	0.0960288	MAPK8, IRAK1, TNF	180	49	16792	5.71156	1	0.34285	0.301456
GOTERM_BP_DIRECT	GO:0071560~cellular response to transforming growth factor beta stimulus	3	1.66667	0.0960288	EDN1, CAV1, WNT5A	180	49	16792	5.71156	1	0.34285	0.301456
GOTERM_BP_DIRECT	GO:0043488~regulation of mRNA stability	4	2.22222	0.0976329	HSPB1, AKT1, PRKCA, HSPA1B	180	103	16792	3.62287	1	0.348111	0.306082
GOTERM_BP_DIRECT	GO:0007157~heterophilic cell-cell adhesion via plasma membrane cell adhesion molecules	3	1.66667	0.0993558	ITGAL, SELE, ICAM1	180	50	16792	5.59733	1	0.353781	0.311067
GOTERM_BP_DIRECT	GO:0007186~G-protein coupled receptor signaling pathway	15	8.33333	0.0999247	PDGFRB, ABCA1, EDN1, CXCL8, INSR, APOA1, CXCL1, AGT, EDNRA, CCL2, AKT1, PPARG, RAC1, APOE, CCR5	180	899	16792	1.55654	1	0.35393	0.311198
